# Supplementary material for: Study of optical rotation based on the molecular structure in fused oligomers of macrocycles
Source: Royal Society of Chemistry journal article supplement (doi:10.1039/d4ra03709j), 2024-01-01
Supplement: d4ra03709j2.pdf [file d4ra03709j2.pdf]

## Electronic Supplementary Information\_2

### Consideration of optical rotation based on the molecular structure in fused oligomers of macrocycles

Ryo Katoono\*, Yudai Obara, Kazuki Sakamoto and Rei Miyashita  
*Department of Chemistry, Faculty of Science, Hokkaido University*

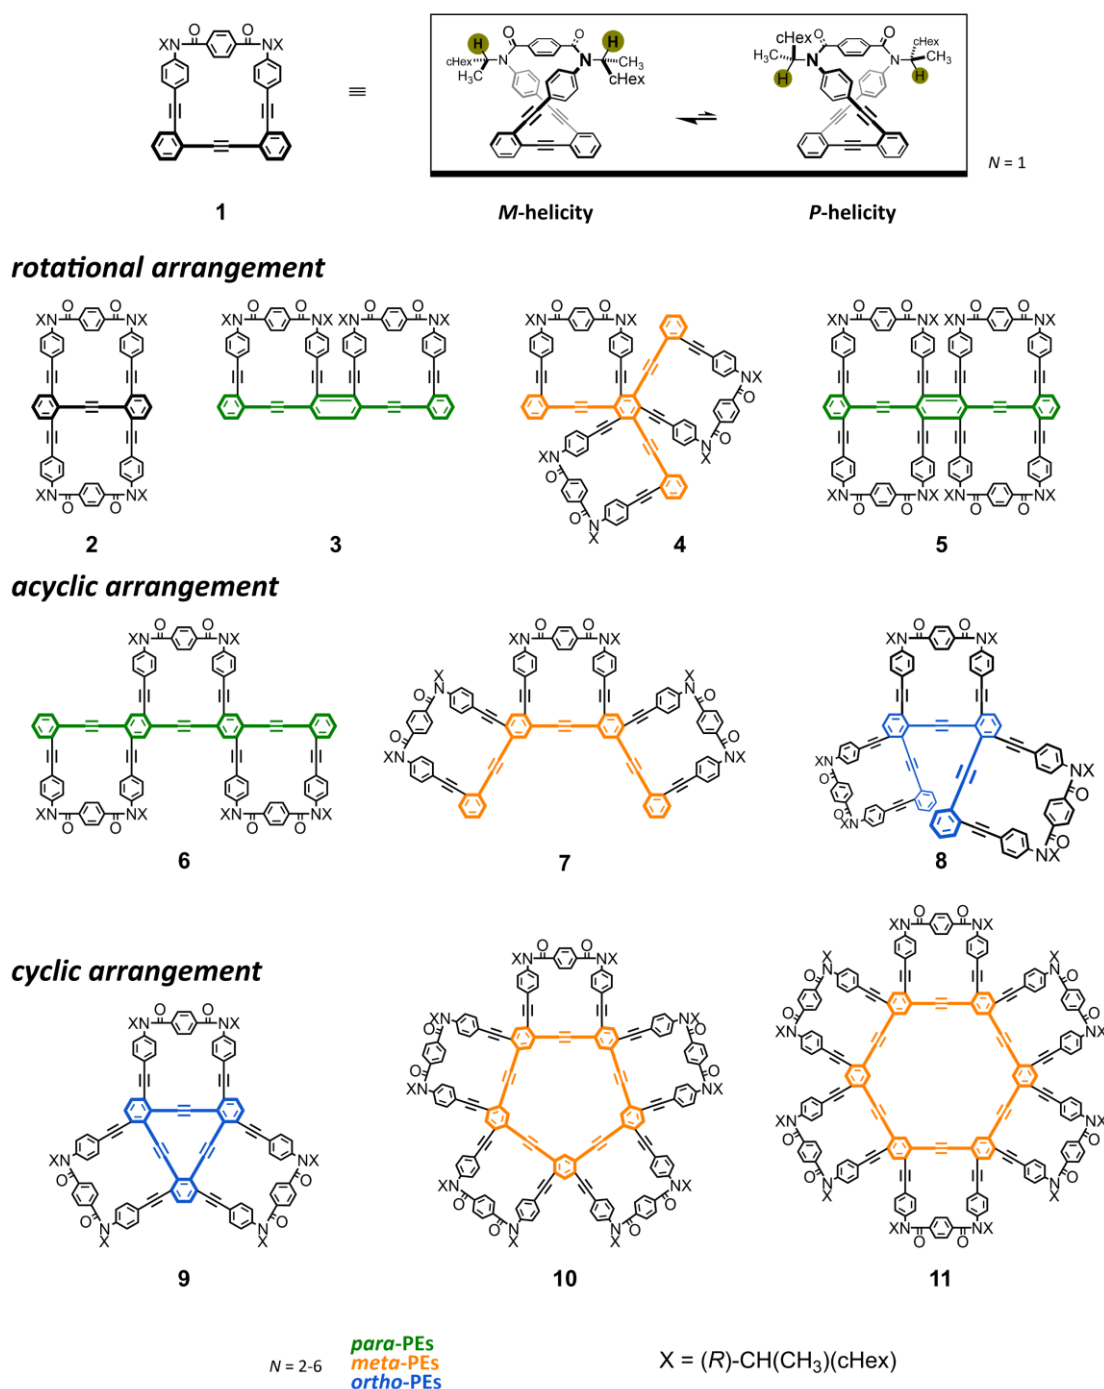

## Contents (ESI\_1)

| <u>Supplementary Figures (Figures S1-S27)</u>                                                                | page    |
|--------------------------------------------------------------------------------------------------------------|---------|
| Conformational searches using MacroModel software.                                                           | S3-S9   |
| <sup>1</sup> H NMR spectra of <b>1-11</b> .                                                                  | S10-S16 |
| Quantitative estimation of the diastereomeric ratio induced in <b>1, 2, 4, and 5</b> .                       | S17-S22 |
| VT-CD spectra of <b>3, 6, 7, 8, and 9</b> .                                                                  | S23-S24 |
| UV spectra of <b>1-11</b> .                                                                                  | S25     |
| Complexation experiment [X = butyl] with a chiral guest ( <b>14</b> ).                                       | S26-S35 |
| UV and CD spectra of <b>3, 6, 7, 8, and 9</b> in the presence of an achiral guest ( <b>13</b> ).             | S36-S37 |
| Plots of $\Delta\epsilon/\epsilon$ for <b>3, 6, 7, 8, and 9</b> before and after complexation ( <b>13</b> ). | S38     |
| <u>Experimental (Schemes S1-S3)</u>                                                                          | S39-S59 |

---

## Contents (ESI\_2)

Copies of <sup>1</sup>H/<sup>13</sup>C NMR spectra and LRMS of new compounds

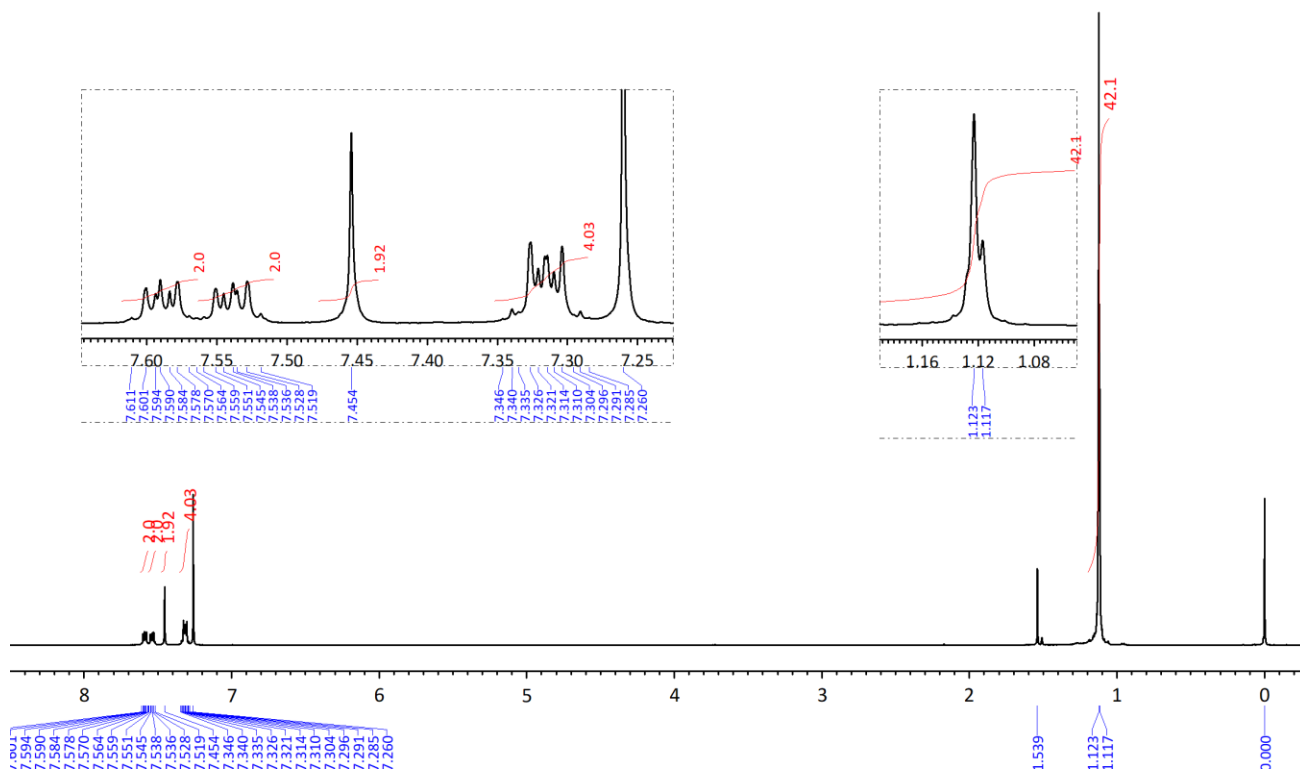

<sup>1</sup>H NMR spectrum (400 MHz) of **16**, measured in CDCl<sub>3</sub> at room temperature.

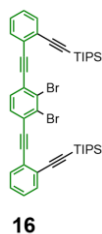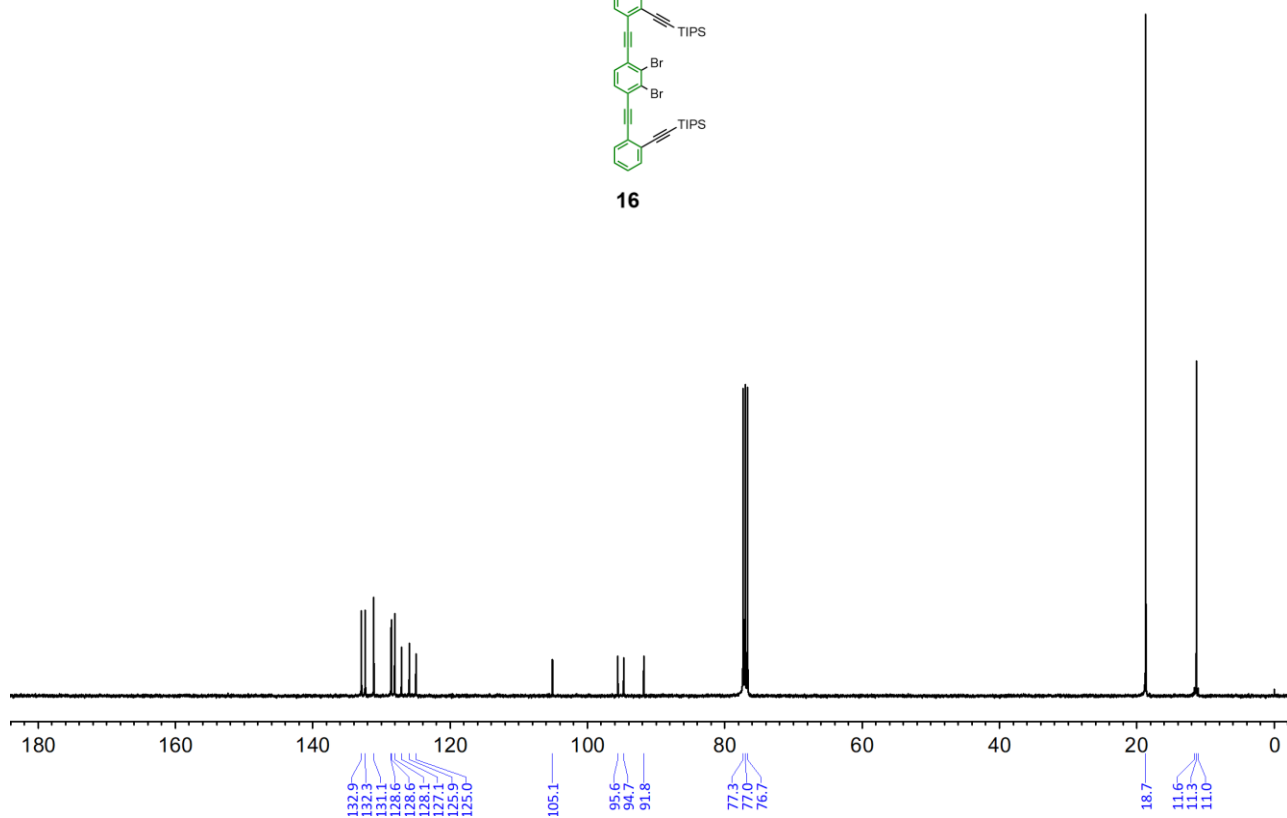

<sup>13</sup>C NMR spectrum (100 MHz) of **16**, measured in CDCl<sub>3</sub> at room temperature.

Data Name: common/Nov20/a51304-  
Sample: u1 katoono / 16o339  
Experiment Date/Time: 2023/11/20 10:08:20

Instrument: JMST-100GCV, Ionization Mode: 1:FD+  
Acquired m/z Range: 40..3200  
Spectrum Time Range: Average(MS[1] Time:0.25)

MS Tune Method Name: FD  
GC: Agilent7890A, Method: -  
Detector Volt: 2300[V]

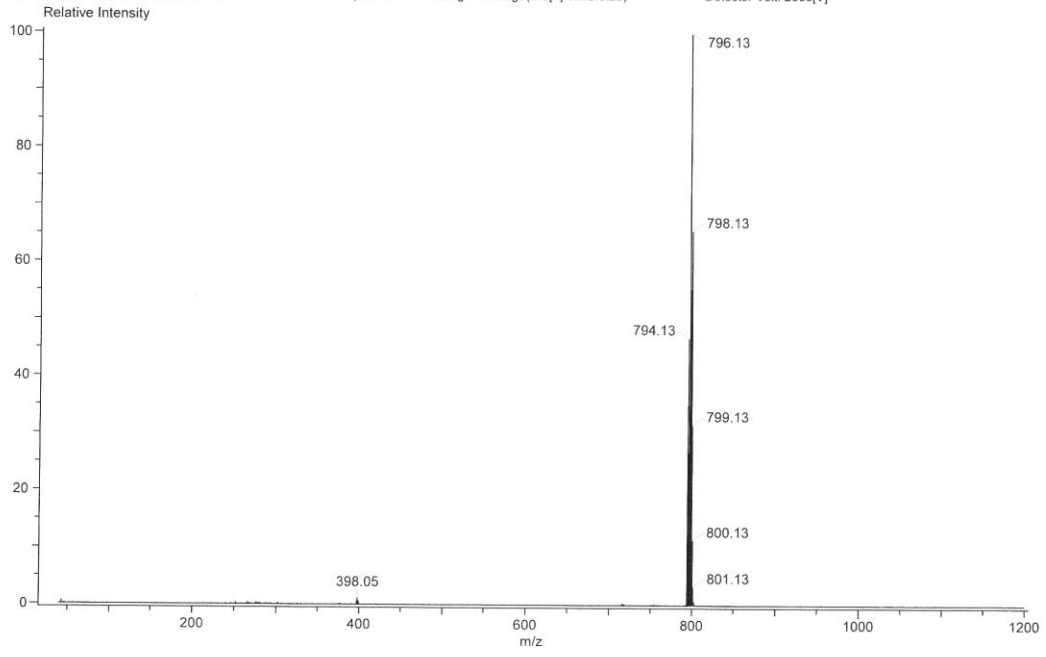

LRMS (FD) of 16.

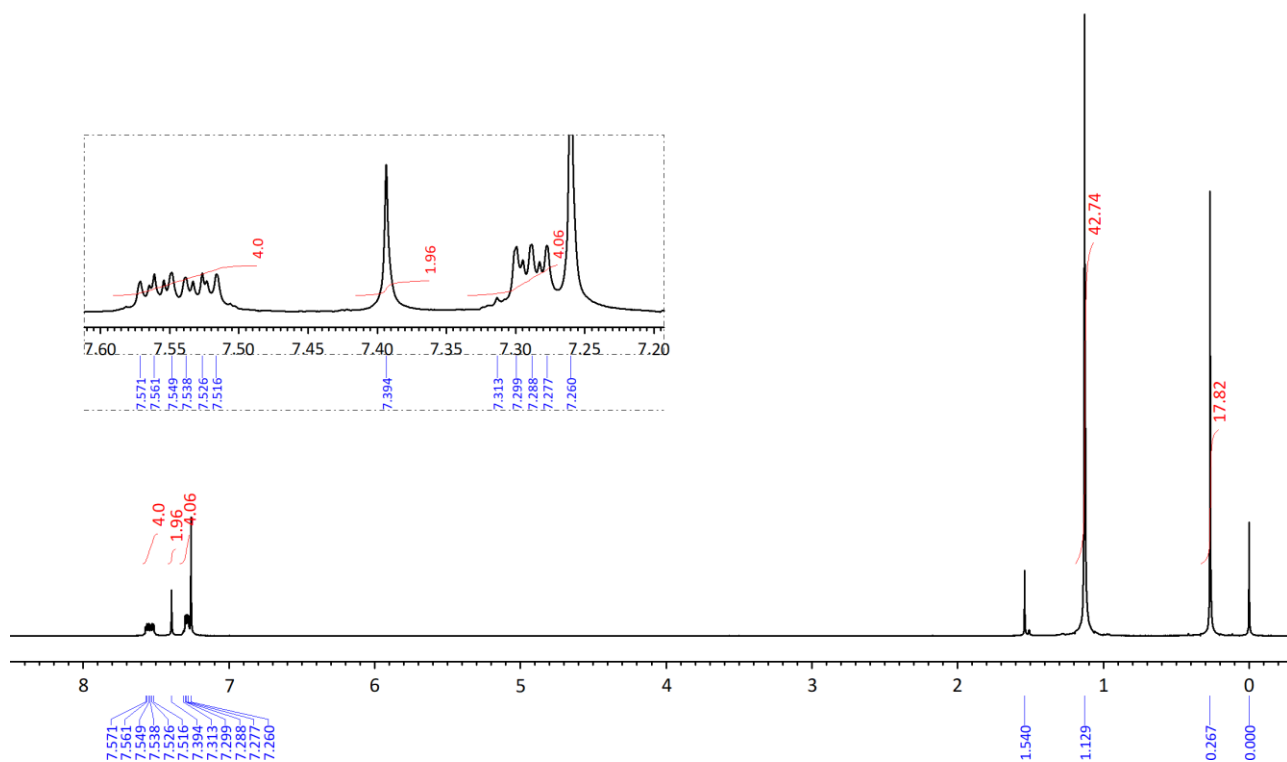

<sup>1</sup>H NMR spectrum (400 MHz) of **17**, measured in CDCl<sub>3</sub> at room temperature.

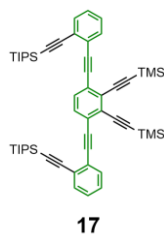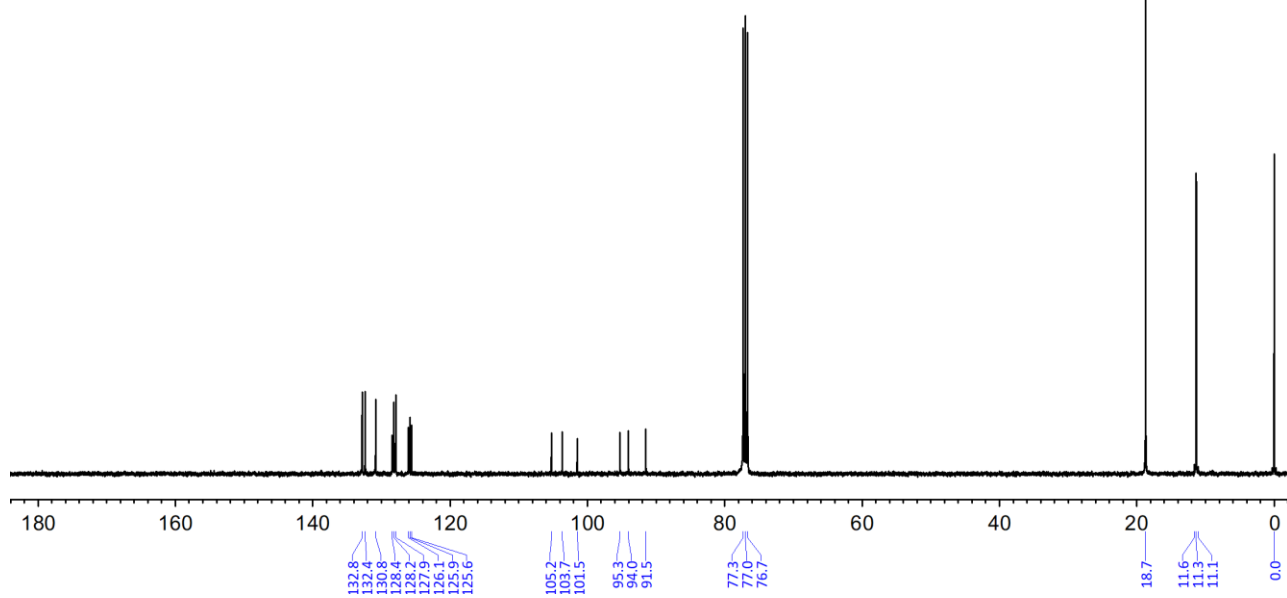

<sup>13</sup>C NMR spectrum (100 MHz) of **17**, measured in CDCl<sub>3</sub> at room temperature.

Data Name: common/Nov20/a51305-  
Sample: u1 katoono / 17o398  
Experiment Date/Time: 2023/11/20 10:15:15

Instrument:JMST-100GCV, Ionization Mode: 1:FD+  
Acquired m/z Range: 40.3200  
Spectrum Time Range: Average(MS[1] Time:0.22)

MS Tune Method Name: FD  
GC:Agilent7890A, Method: -  
Detector Volt: 2300[V]

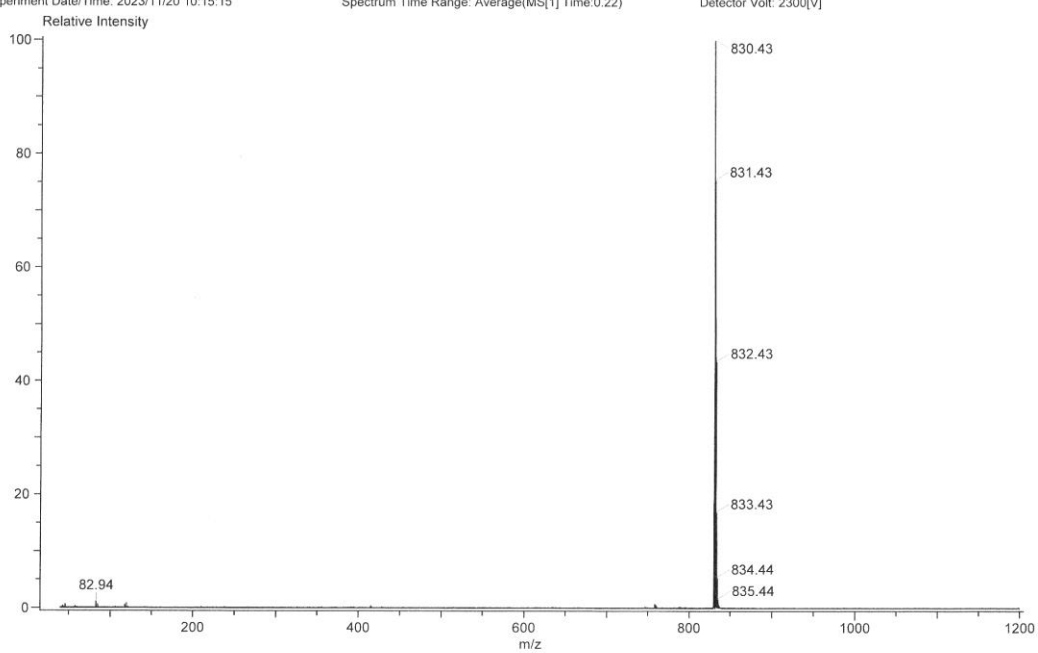

LRMS (FD) of 17.

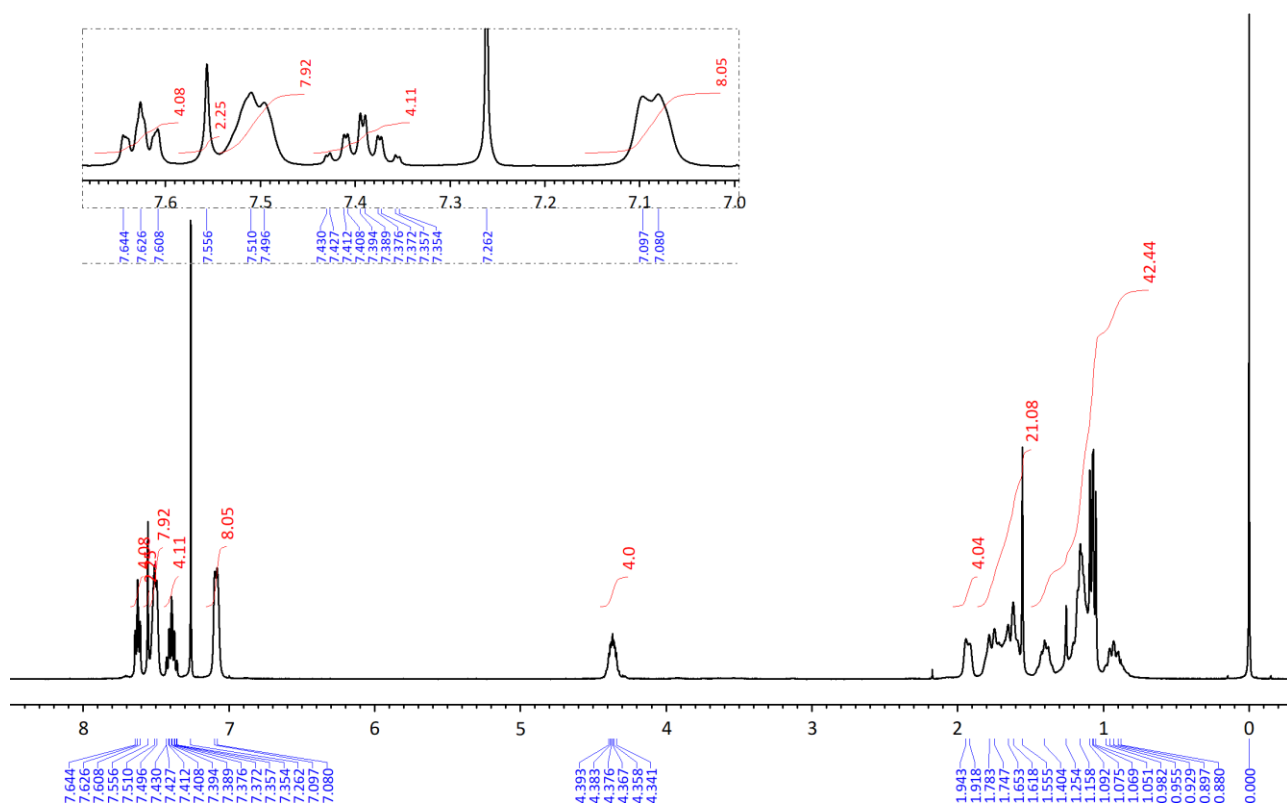

<sup>1</sup>H NMR spectrum (400 MHz) of pr-3, measured in CDCl<sub>3</sub> at room temperature.

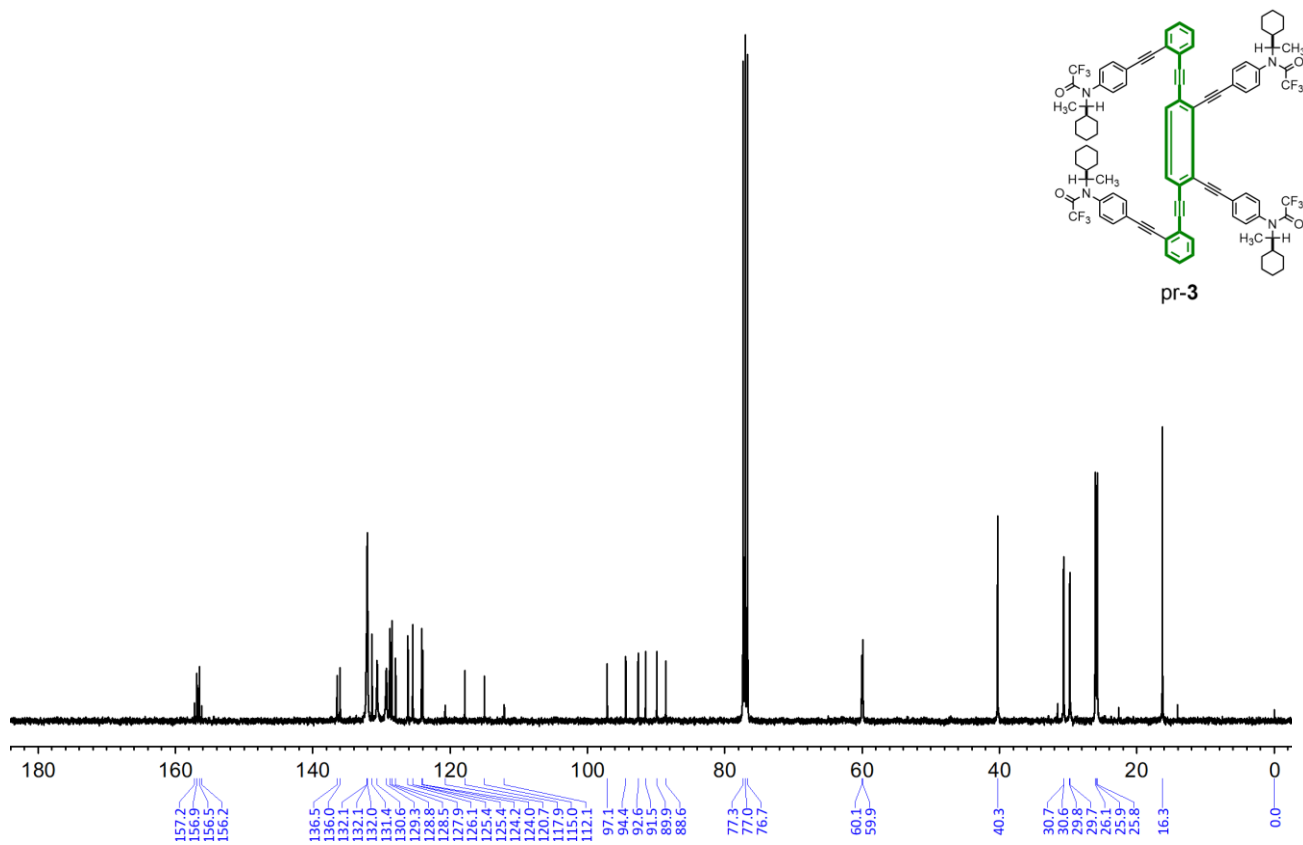

<sup>13</sup>C NMR spectrum (100 MHz) of pr-3, measured in CDCl<sub>3</sub> at room temperature.

Data Name: common/Nov20 a51297-  
Sample: u1 katoono / pr3o318  
Experiment Date/Time: 2023/11/20 16:07:34

Instrument:JMST-100GCV, Ionization Mode: 1:FD+  
Acquired m/z Range: 40. 3200  
Spectrum Time Range: Average(MS[1] Time:0.40)

MS Tune Method Name: FD  
GC:Agilent7890A, Method: -  
Detector Volt: 2300[V]

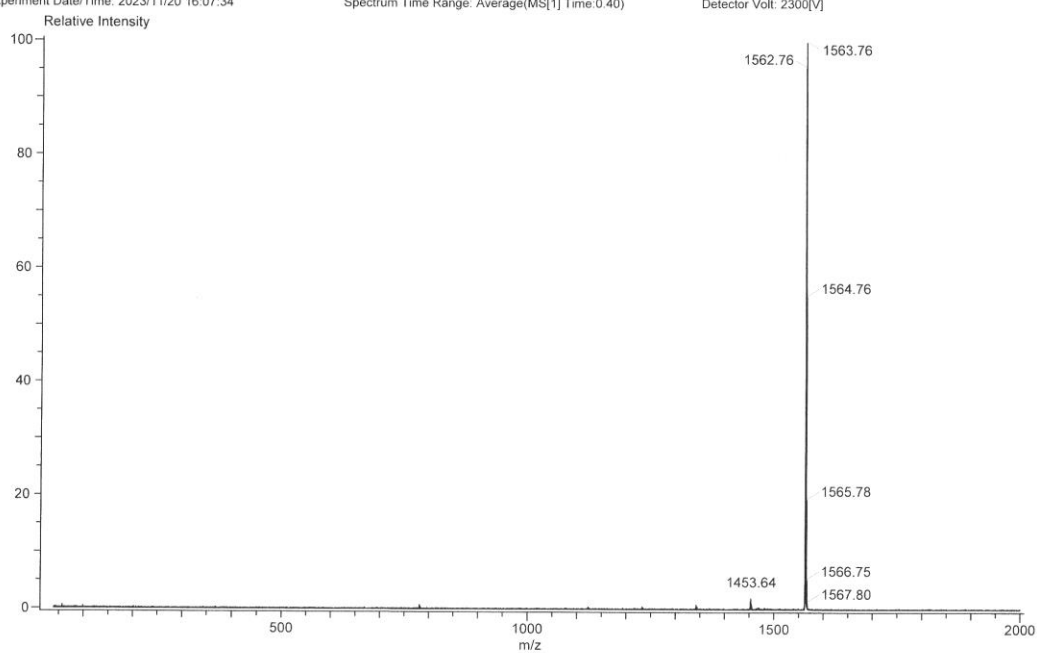

LRMS (FD) of pr-3.



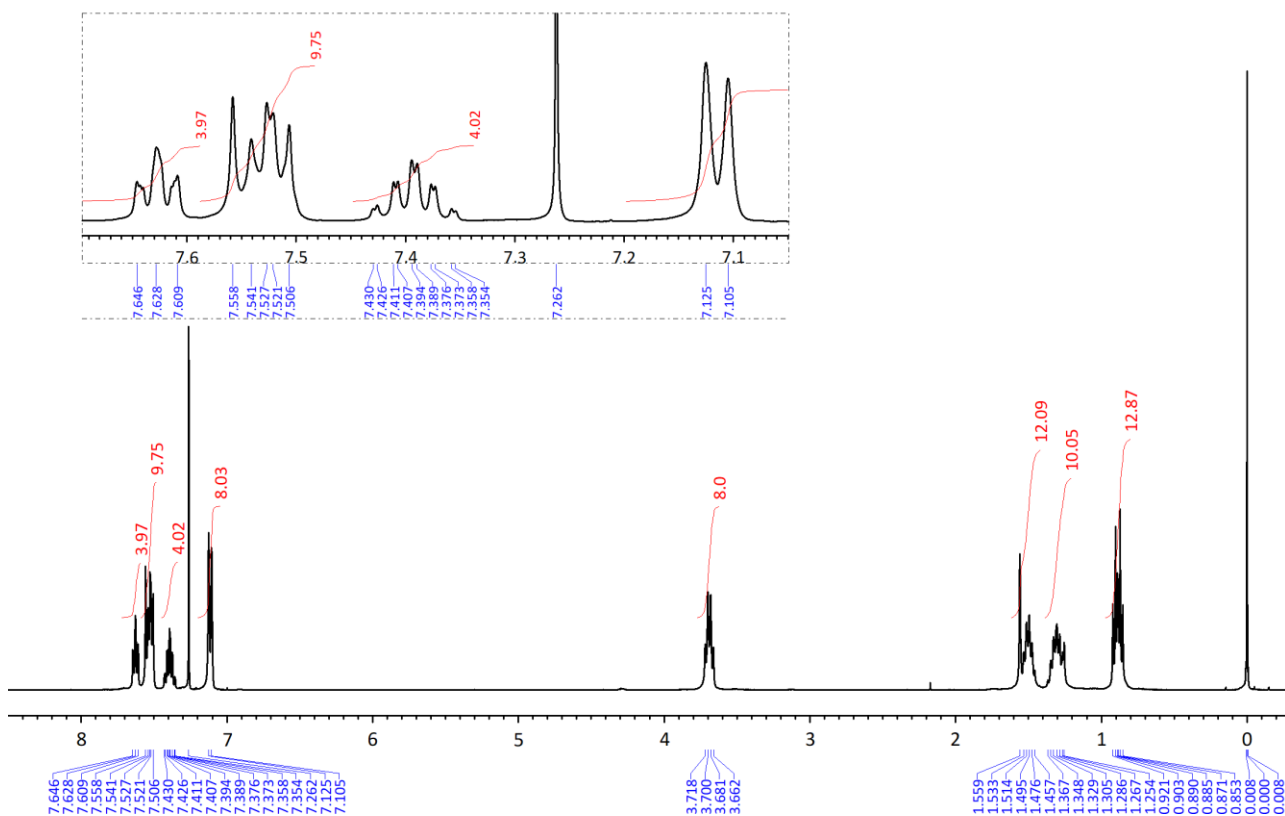

<sup>1</sup>H NMR spectrum (400 MHz) of pr-3B, measured in CDCl<sub>3</sub> at room temperature.

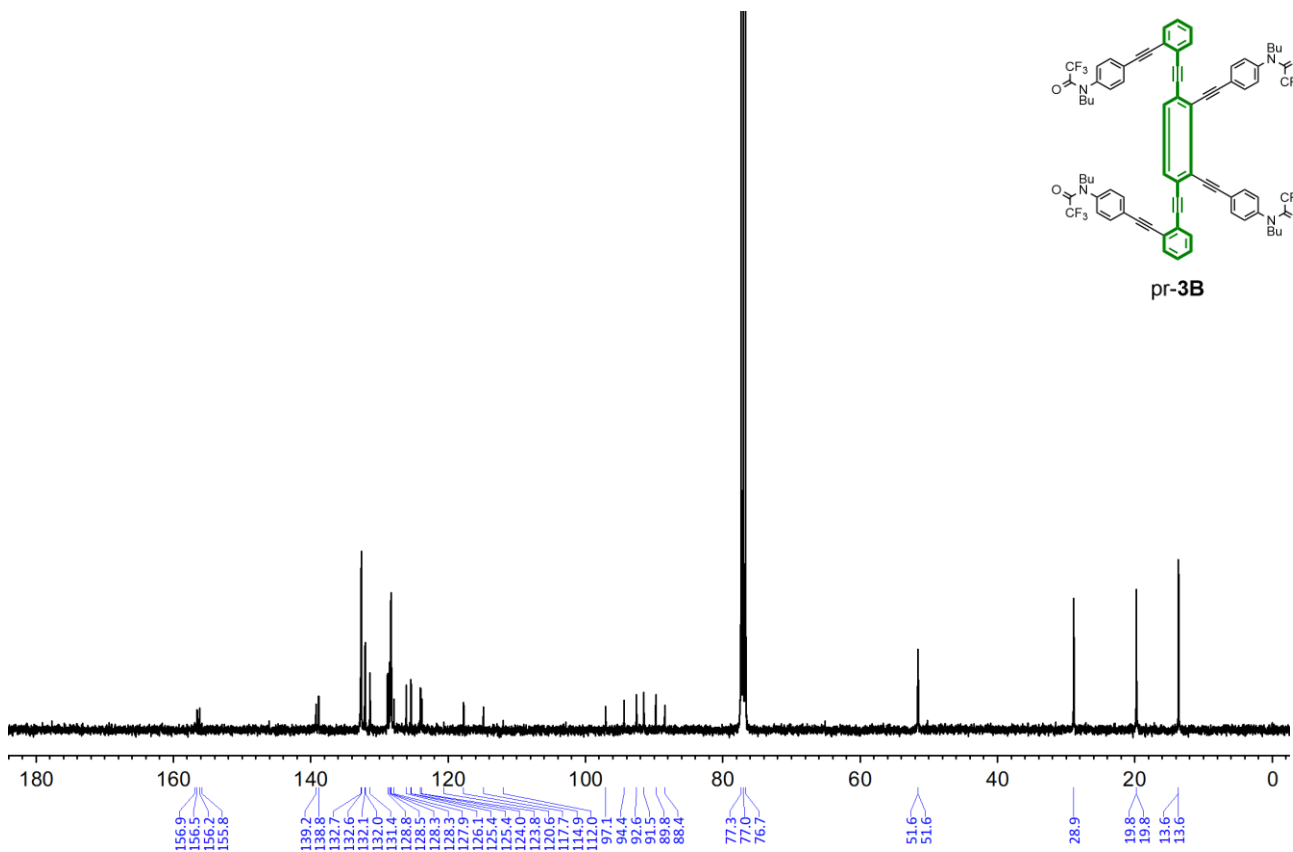

<sup>13</sup>C NMR spectrum (100 MHz) of pr-3B, measured in CDCl<sub>3</sub> at room temperature.

Data Name: common/Nov20\_a51296-  
Sample: u1 katoono / pr3Bc406  
Experiment Date/Time: 2023/11/20 15:58:41

Instrument:JMST-100GCV, Ionization Mode: 1:FD+  
Acquired m/z Range: 40..3200  
Spectrum Time Range: Average(MS[1]) Time:0.38)

MS Tune Method Name: FD  
GC:Agilent7890A, Method: -  
Detector Volt: 2300[V]

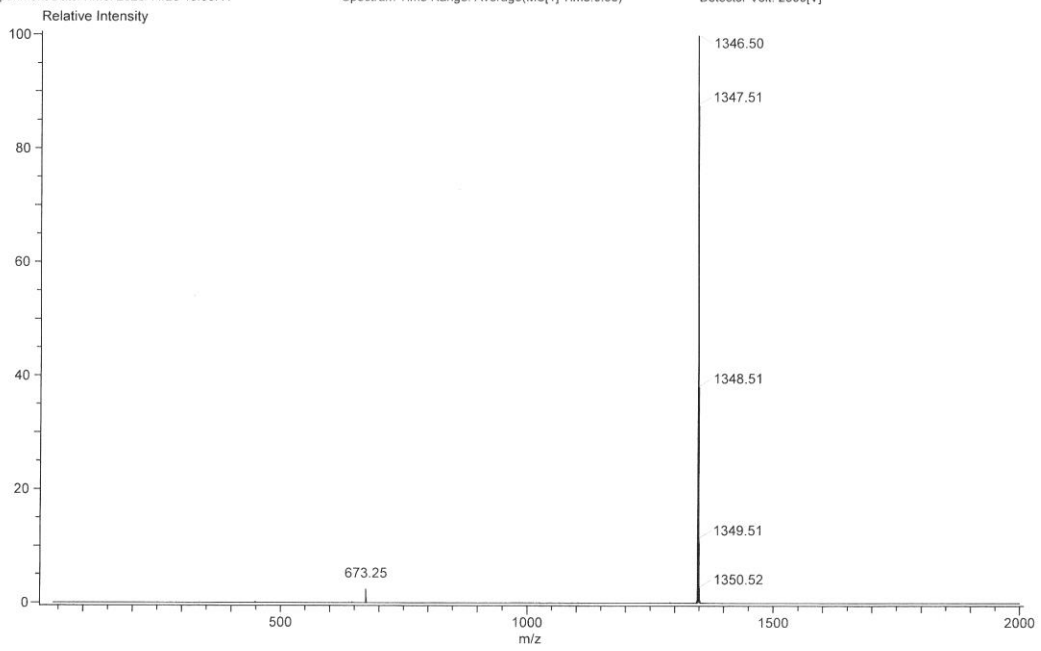

LRMS (FD) of pr-3B.

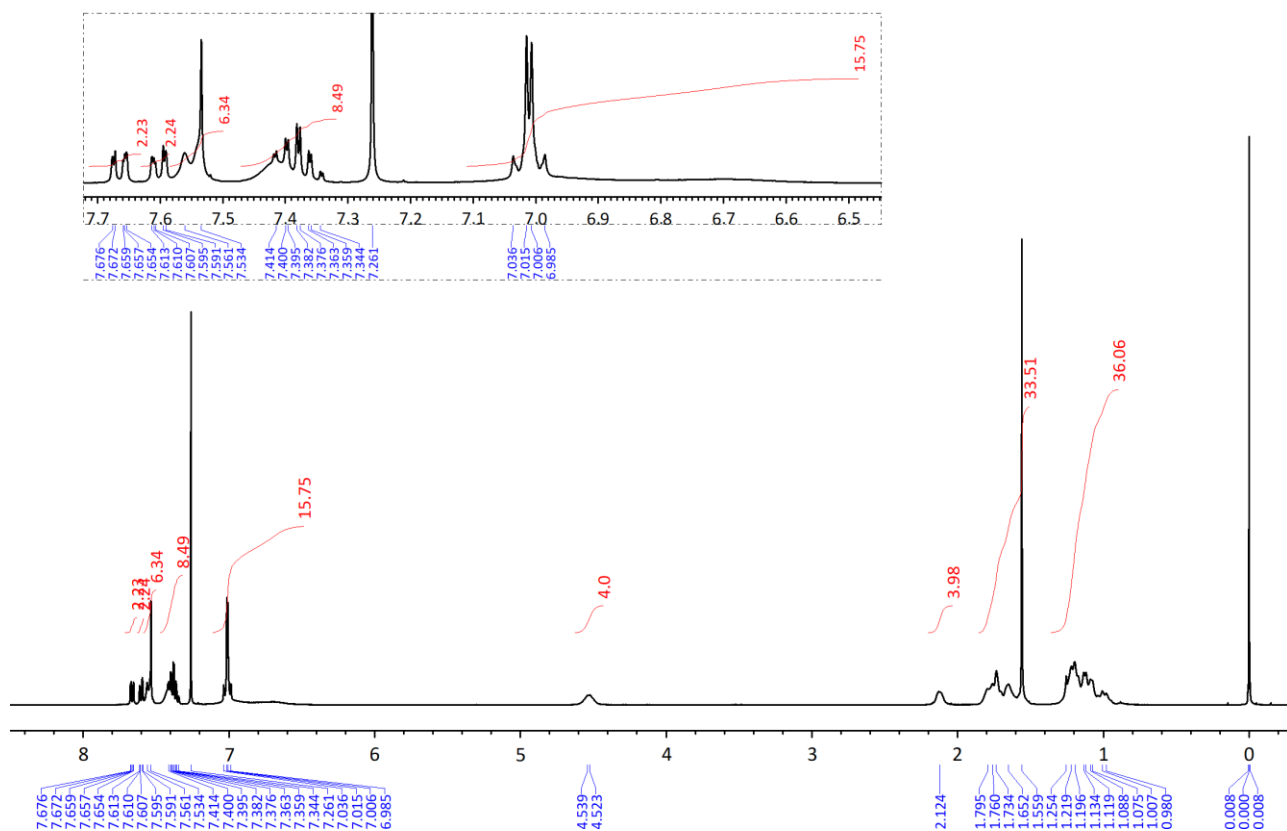

<sup>1</sup>H NMR spectrum (400 MHz) of **3**, measured in CDCl<sub>3</sub> at room temperature.

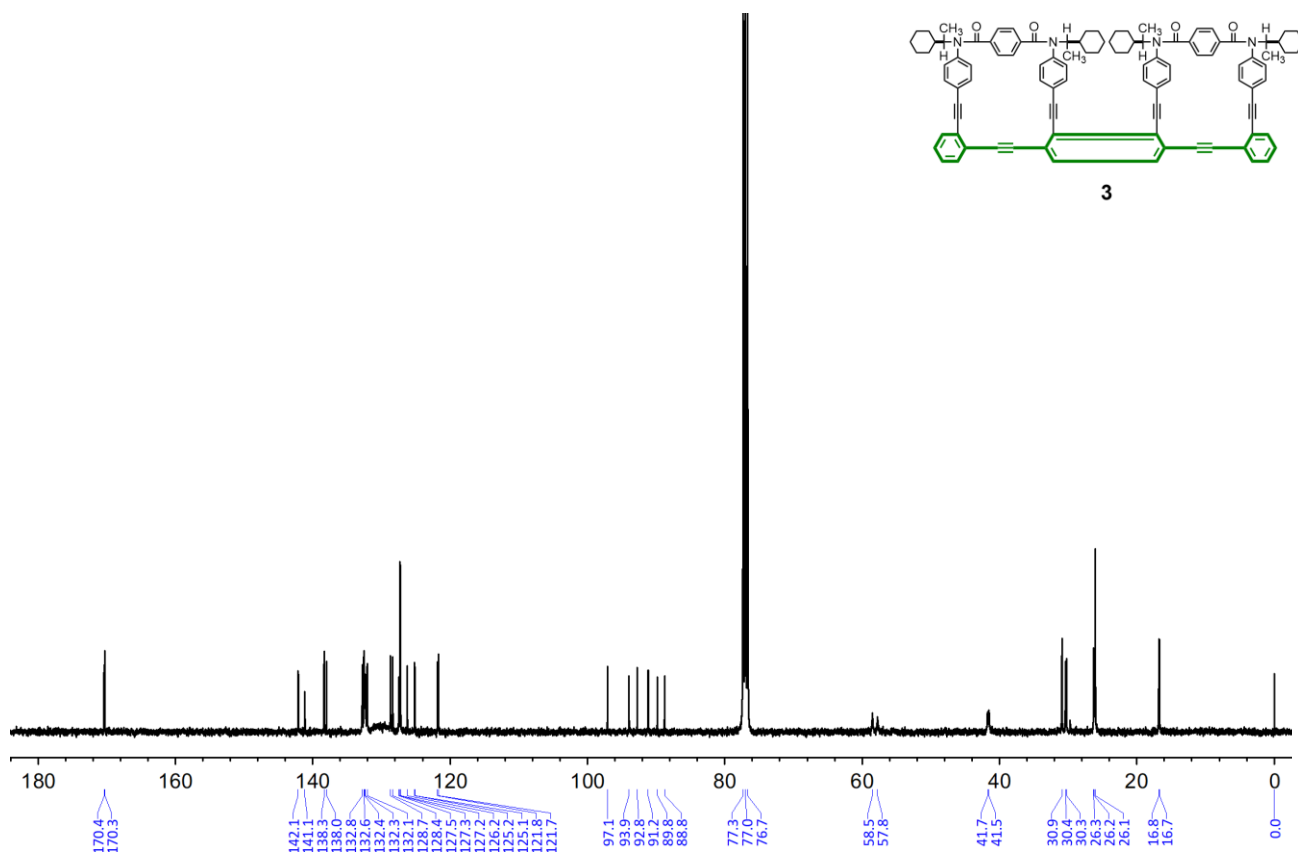

<sup>13</sup>C NMR spectrum (100 MHz) of **3**, measured in CDCl<sub>3</sub> at 313 K.

Data Name: common/Nov21\_a51293-  
Sample: u1 katoono / 3m44  
Experiment Date/Time: 2023/11/21 9:56:17

Instrument: JMST-100GCV, Ionization Mode: 1:FD+  
Acquired m/z Range: 40..3200  
Spectrum Time Range: Average(MS[1] Time:0.46)

MS Tune Method Name: FD  
GC: Agilent7890A, Method: -  
Detector Volt: 2300[V]

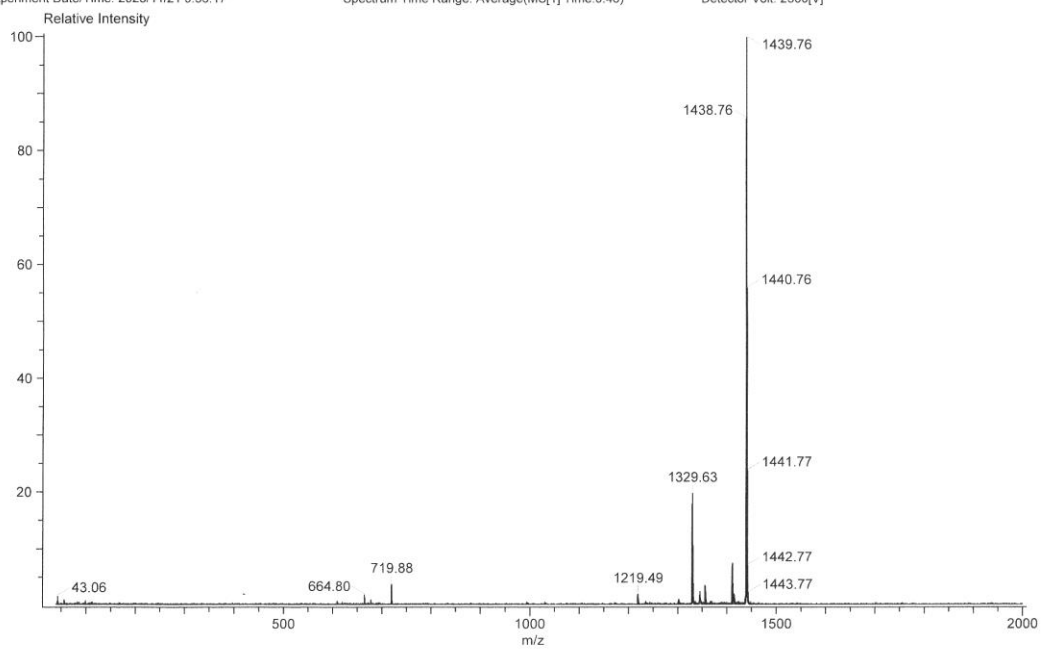

LRMS (FD) of 3.

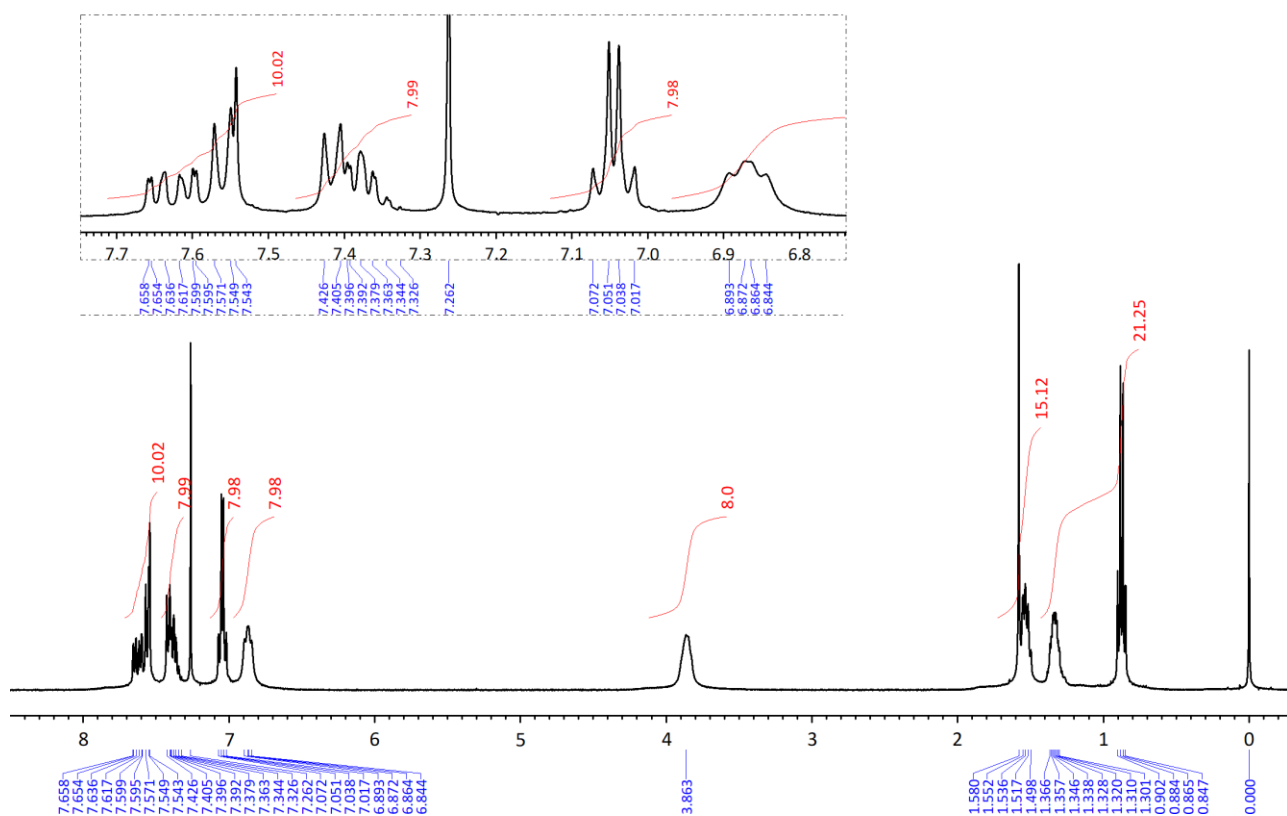

<sup>1</sup>H NMR spectrum (400 MHz) of **3B**, measured in CDCl<sub>3</sub> at room temperature.

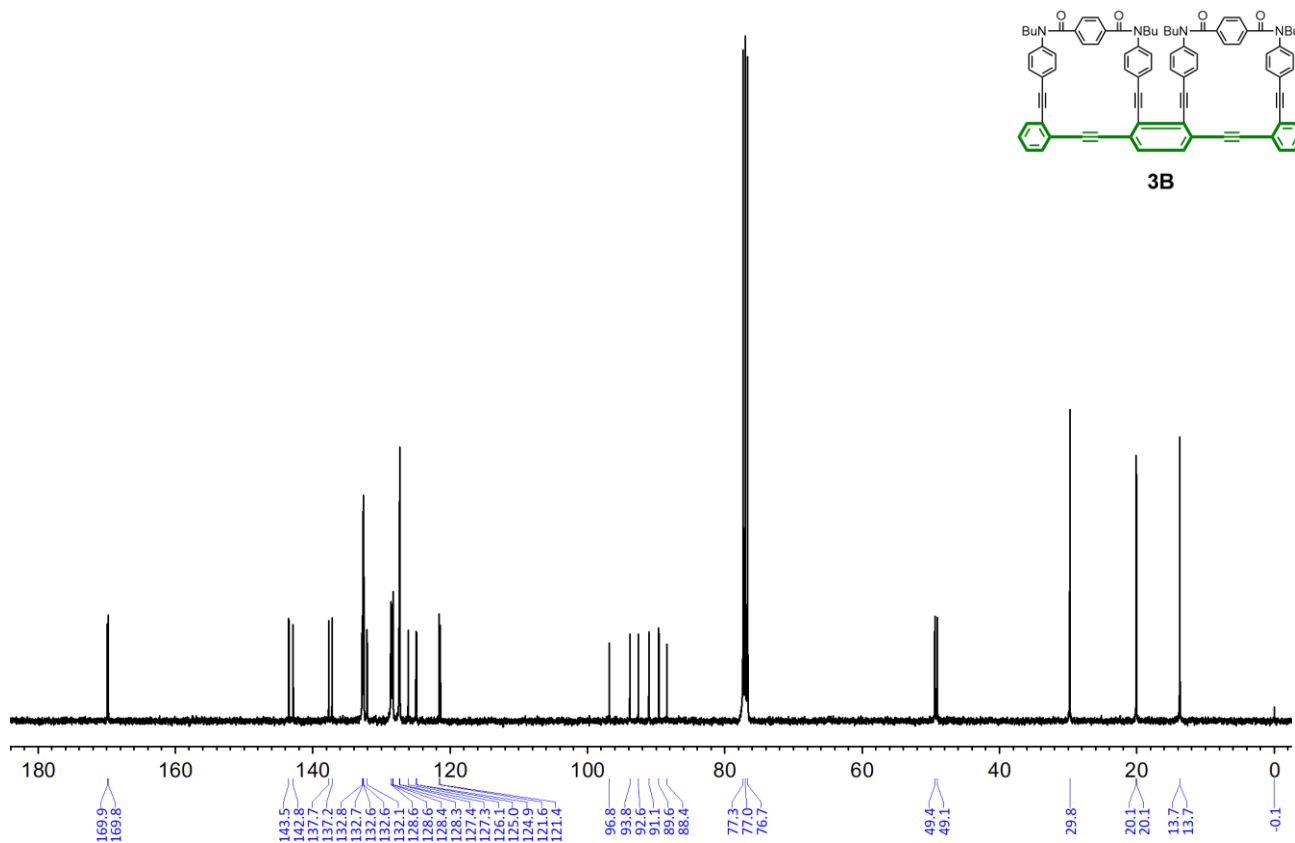

<sup>13</sup>C NMR spectrum (100 MHz) of **3**, measured in CDCl<sub>3</sub> at room temperature.

Data Name: common/Nov20\_a51292-  
Sample: u1 katoono / 38m39  
Experiment Date/Time: 2023/11/20 15:37:33

Instrument:JMST-100GCV, Ionization Mode: 1:FD+  
Acquired m/z Range: 40..3200  
Spectrum Time Range: Average(MS[1] Time:0.46)

MS Tune Method Name: FD  
GC:Agilent7890A, Method: -  
Detector Volt: 2300[V]

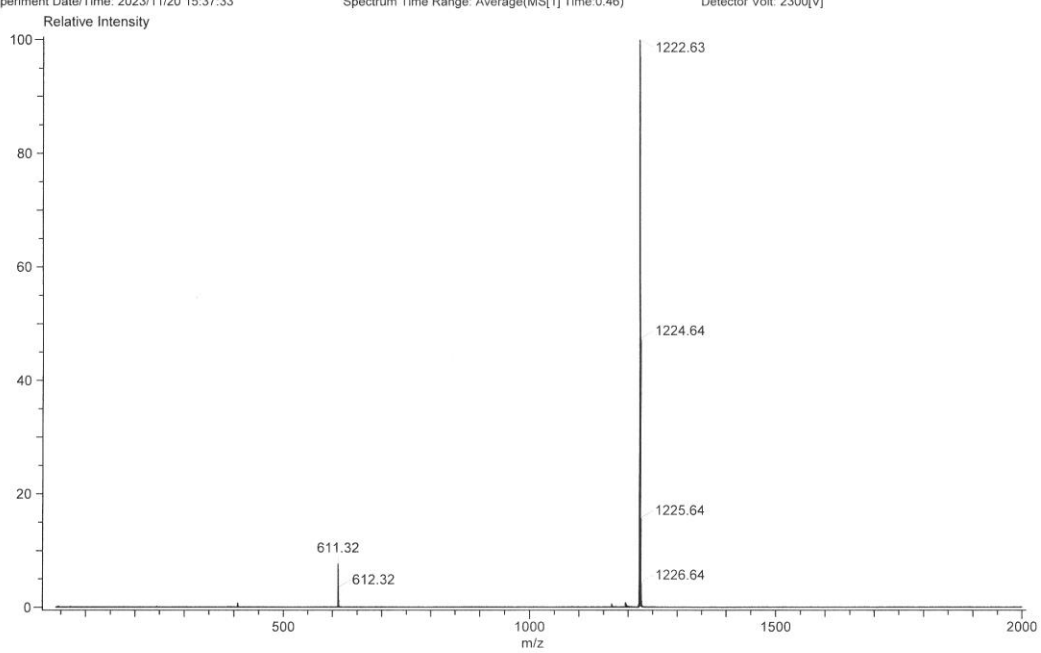

LRMS (FD) of **3B**.

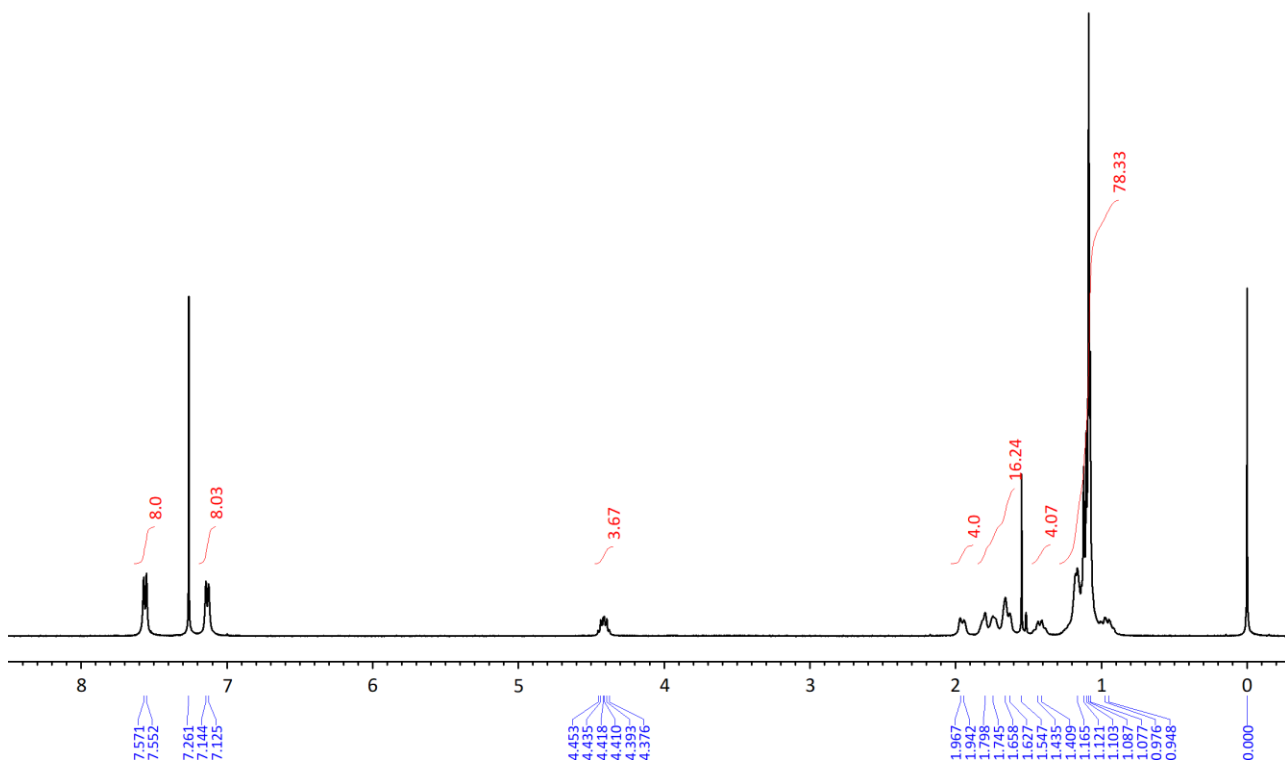

$^1\text{H}$  NMR spectrum (400 MHz) of **19**, measured in  $\text{CDCl}_3$  at room temperature.

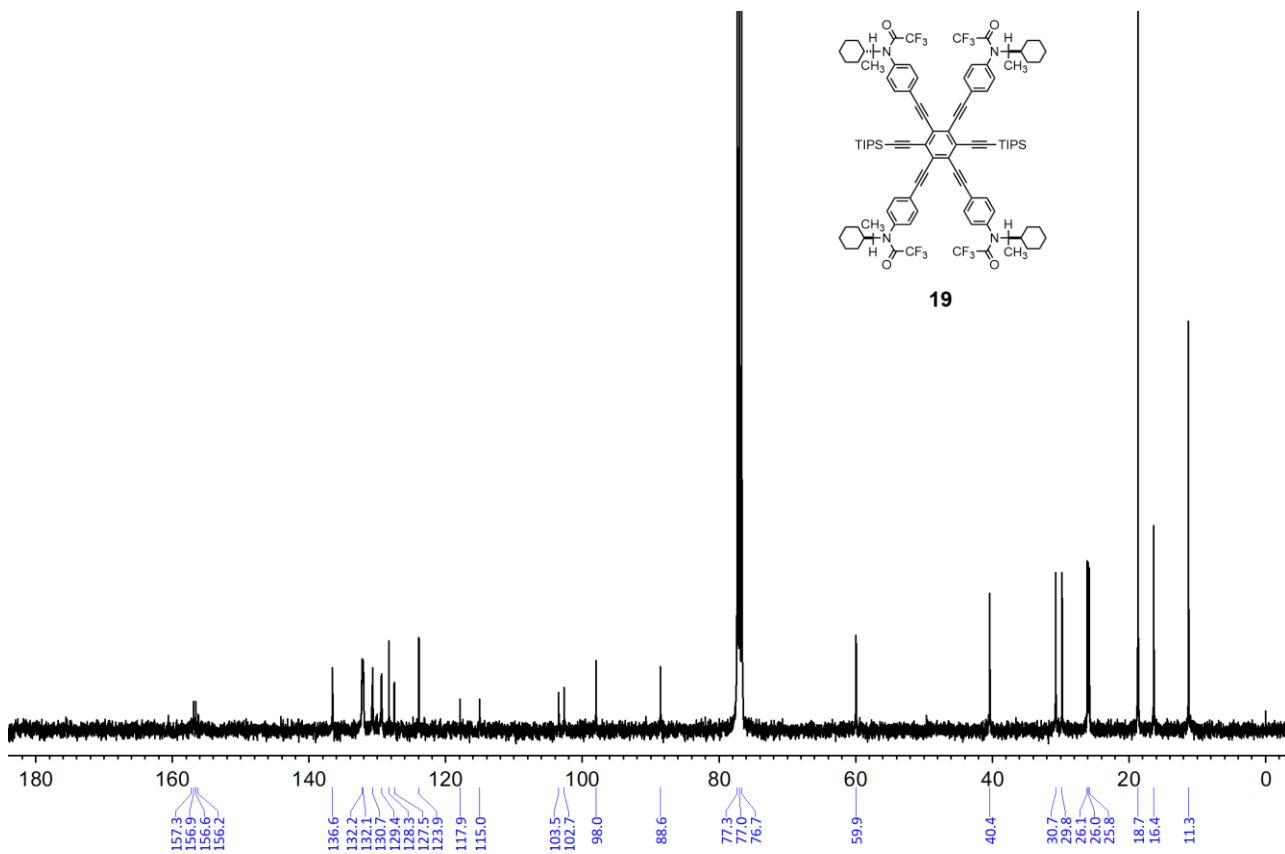

$^{13}\text{C}$  NMR spectrum (100 MHz) of **19**, measured in  $\text{CDCl}_3$  at room temperature.

Data Name: common/Nov20.a51301-  
Sample: u1 katoono / 19o396  
Experiment Date/Time: 2023/11/20 16:34:02

Instrument:JMST-100GCV, Ionization Mode: 1:FD+  
Acquired m/z Range: 40. 6400  
Spectrum Time Range: Average(MS[1] Time:0.43)

MS Tune Method Name: FD  
GC:Agilent7890A, Method: -  
Detector Volt: 2300[V]

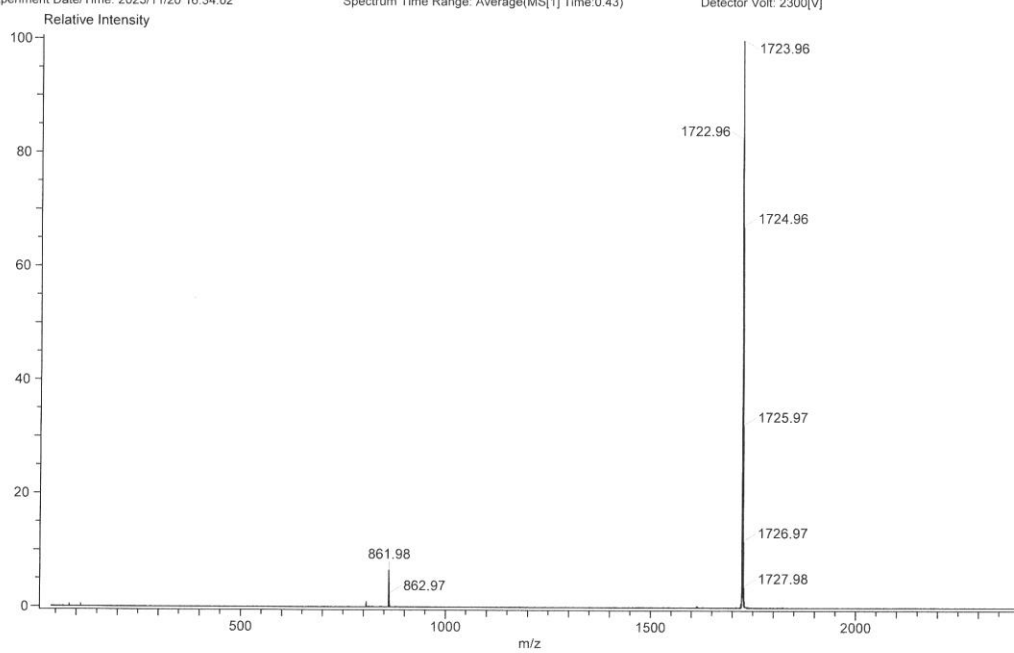

LRMS (FD) of **19**.



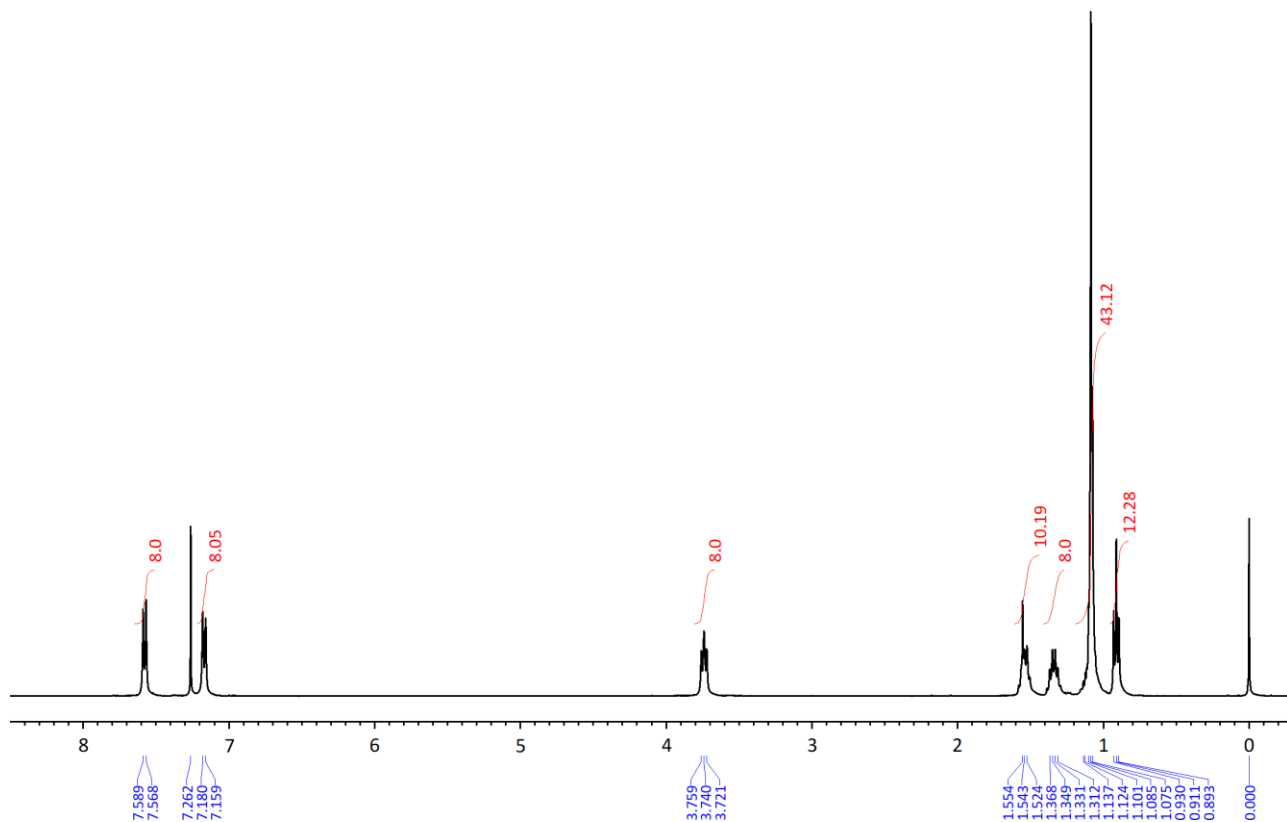

$^1\text{H}$  NMR spectrum (400 MHz) of **19B**, measured in  $\text{CDCl}_3$  at room temperature.

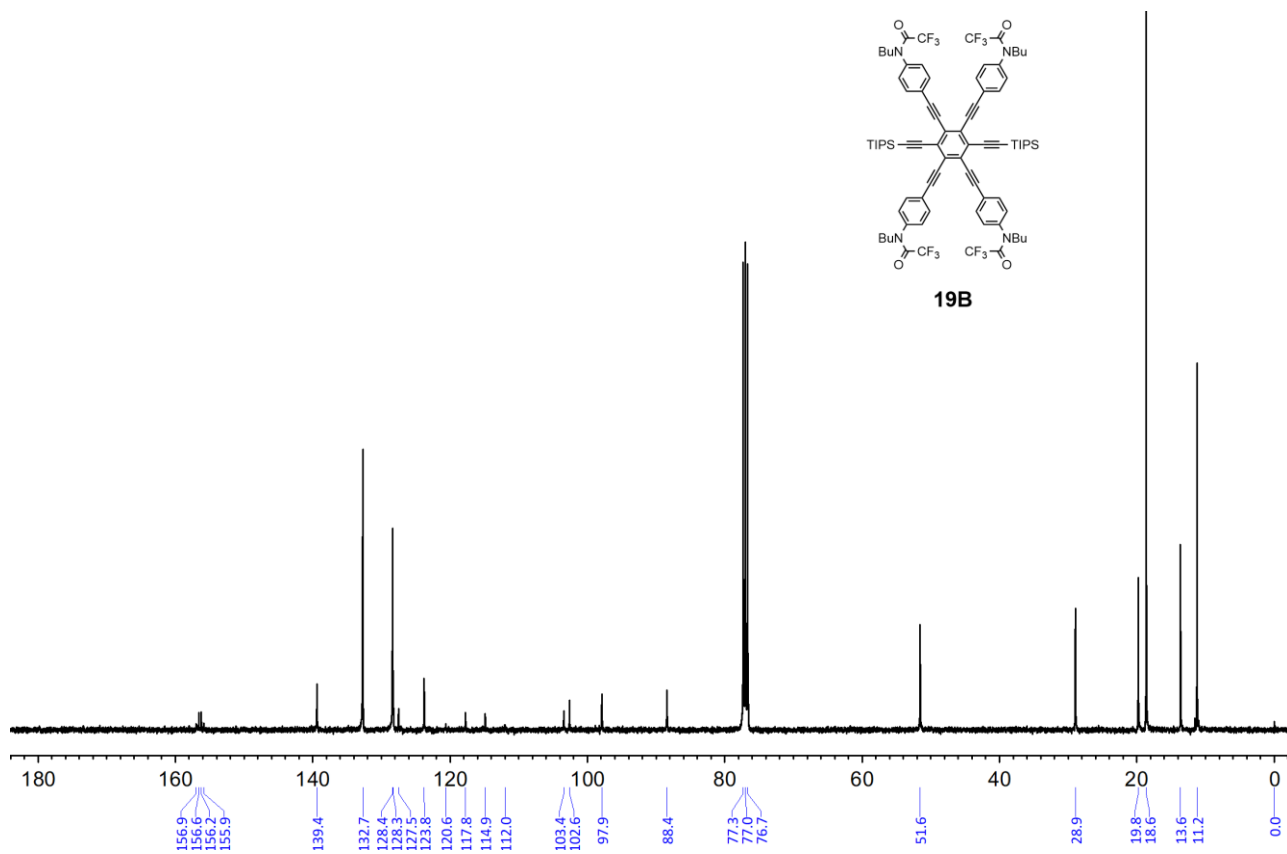

$^{13}\text{C}$  NMR spectrum (100 MHz) of **19B**, measured in  $\text{CDCl}_3$  at room temperature.

Data Name: common/Nov20\_a51300-  
Sample: u1 katoono / 19Bo378  
Experiment Date/Time: 2023/11/20 16:21:54

Instrument:JMST-100GCV, Ionization Mode: 1:FD+  
Acquired m/z Range: 40..3200  
Spectrum Time Range: Average(MS[1]) Time:0.43

MS Tune Method Name: FD  
GC:Agilent7890A, Method: -  
Detector Volt: 2300[V]

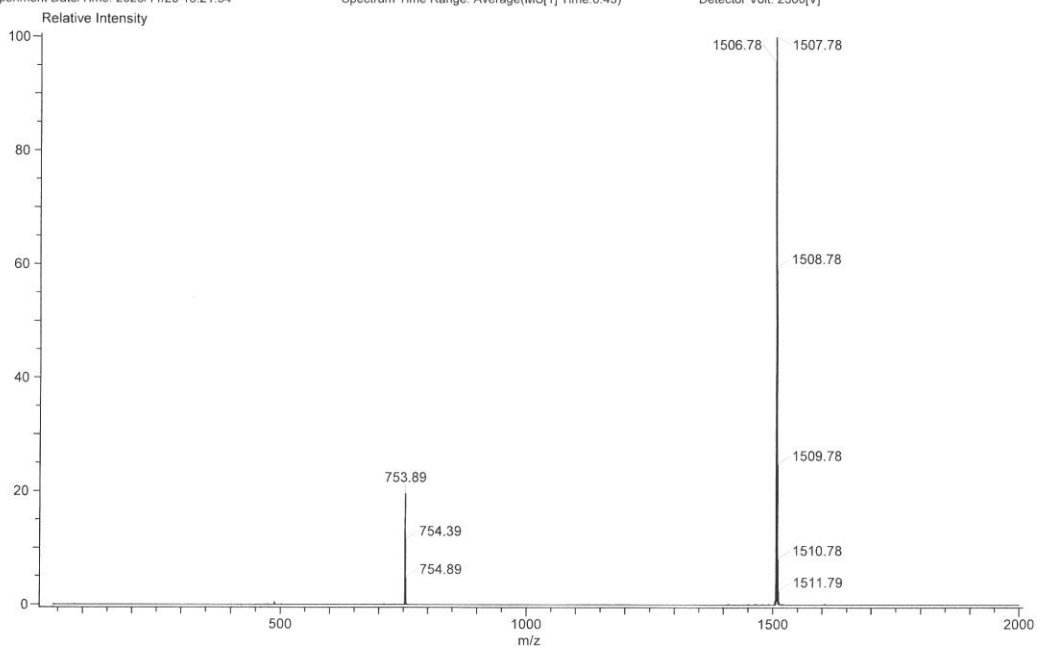

LRMS (FD) of **19B**.

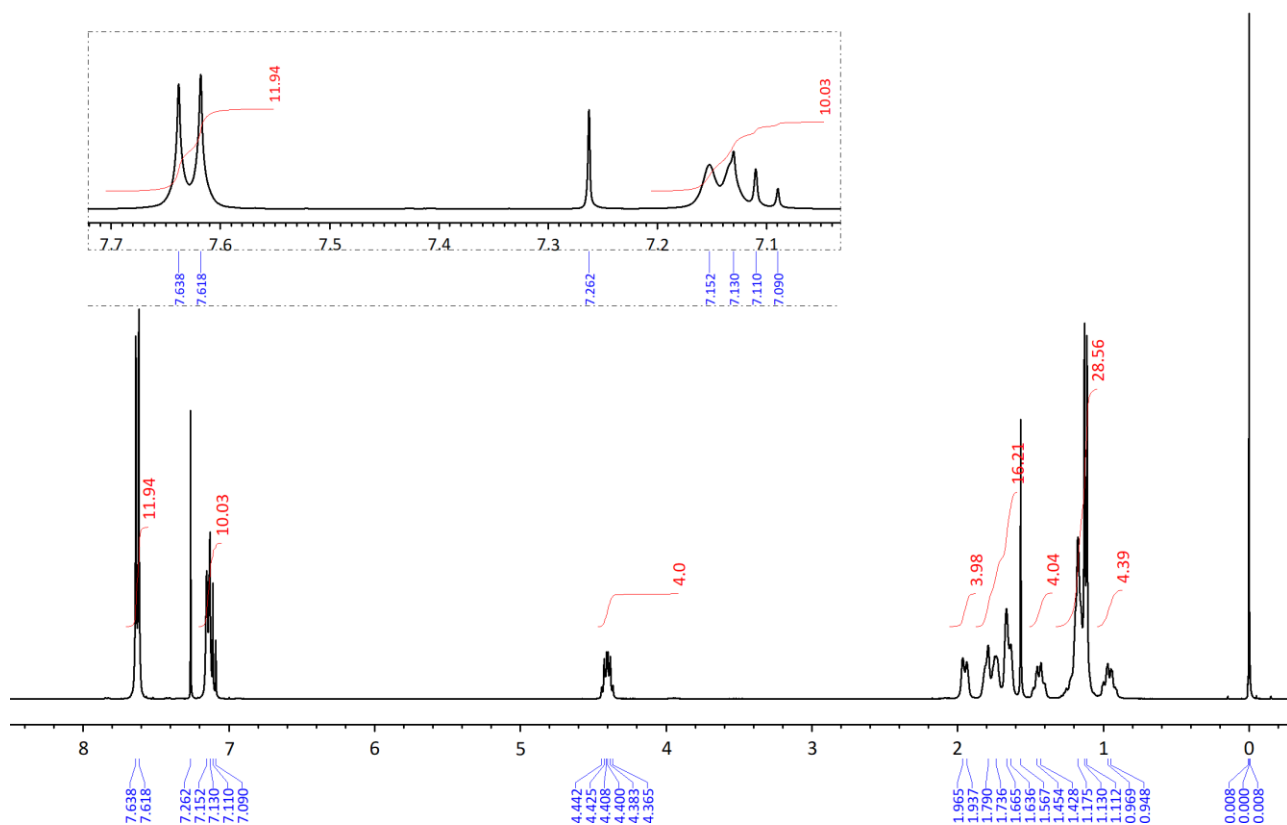

<sup>1</sup>H NMR spectrum (400 MHz) of **20**, measured in CDCl<sub>3</sub> at room temperature.

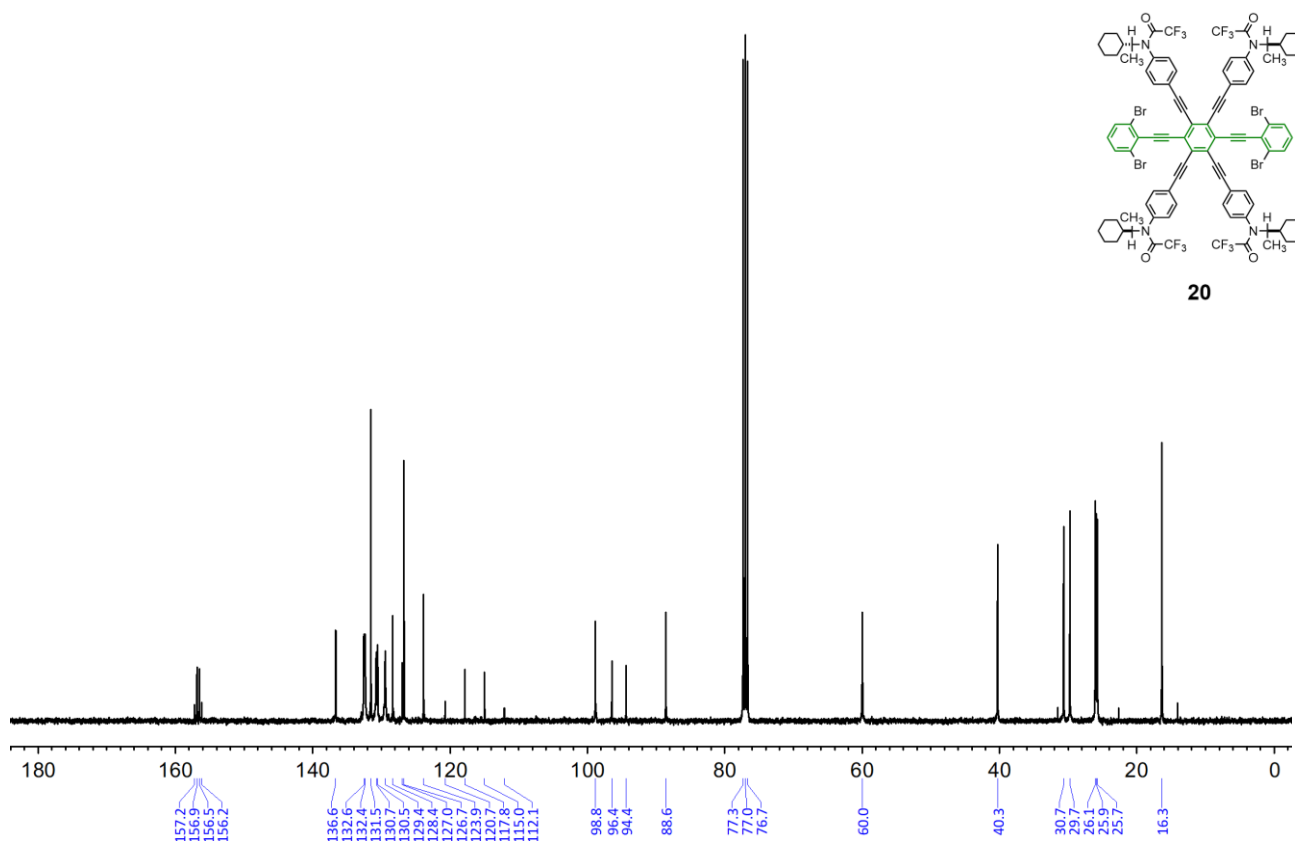

<sup>13</sup>C NMR spectrum (100 MHz) of **20**, measured in CDCl<sub>3</sub> at room temperature.

Data Name: common/Nov21\_a51303-  
Sample: r1 katonno / 20c404  
Experiment Date/Time: 2023/11/21 9:44:32

Instrument:JMST-100GCV, Ionization Mode: 1:FD+  
Acquired m/z Range: 40\_6400  
Spectrum Time Range: Average(MS[1] Time:0.42)

MS Tune Method Name: FD  
GC:Agilent7890A, Method: -  
Detector Volt: 2300[V]

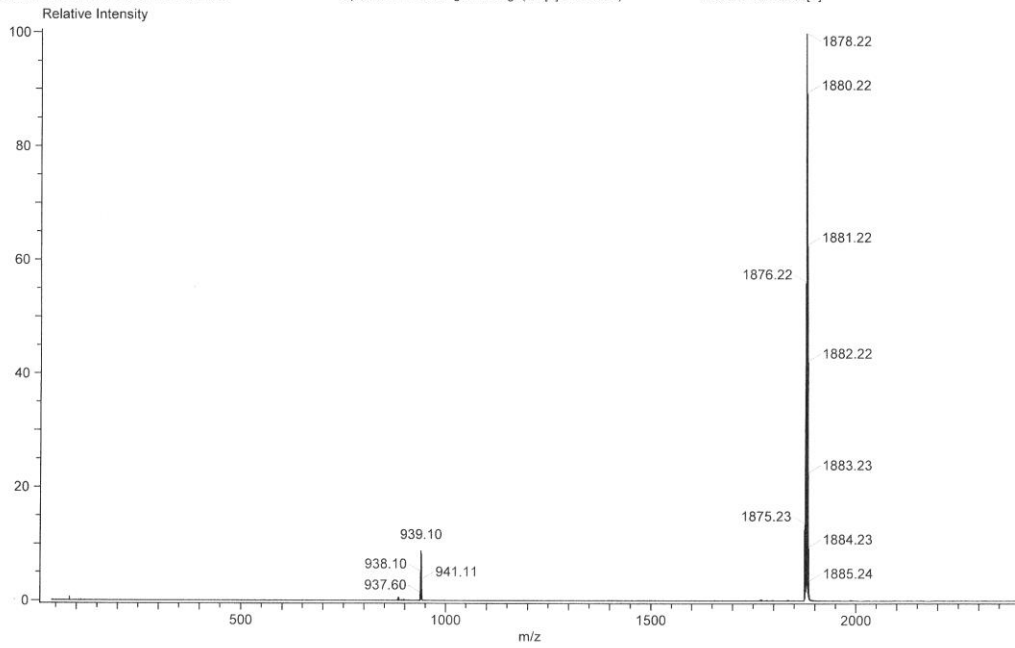

LRMS (FD) of **20**.

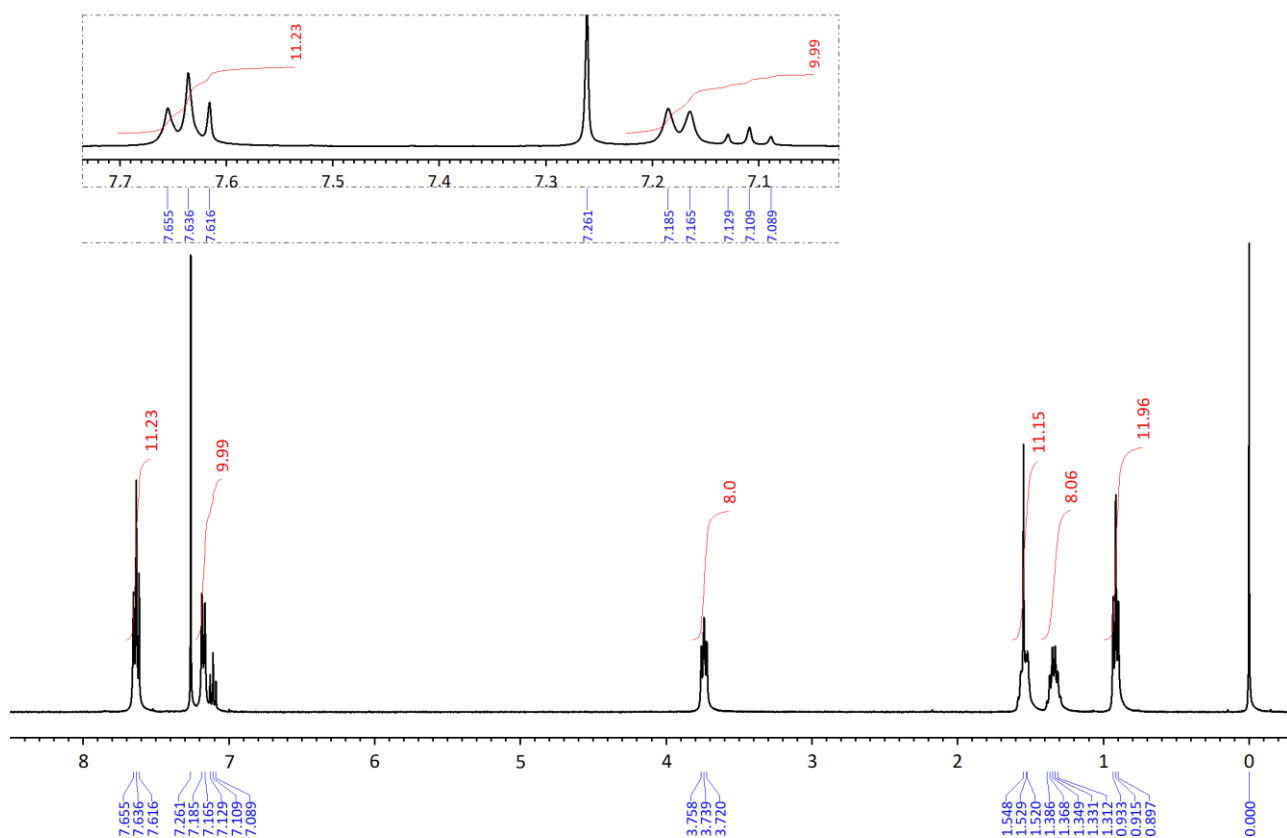

$^1\text{H}$  NMR spectrum (400 MHz) of **20B**, measured in  $\text{CDCl}_3$  at room temperature.

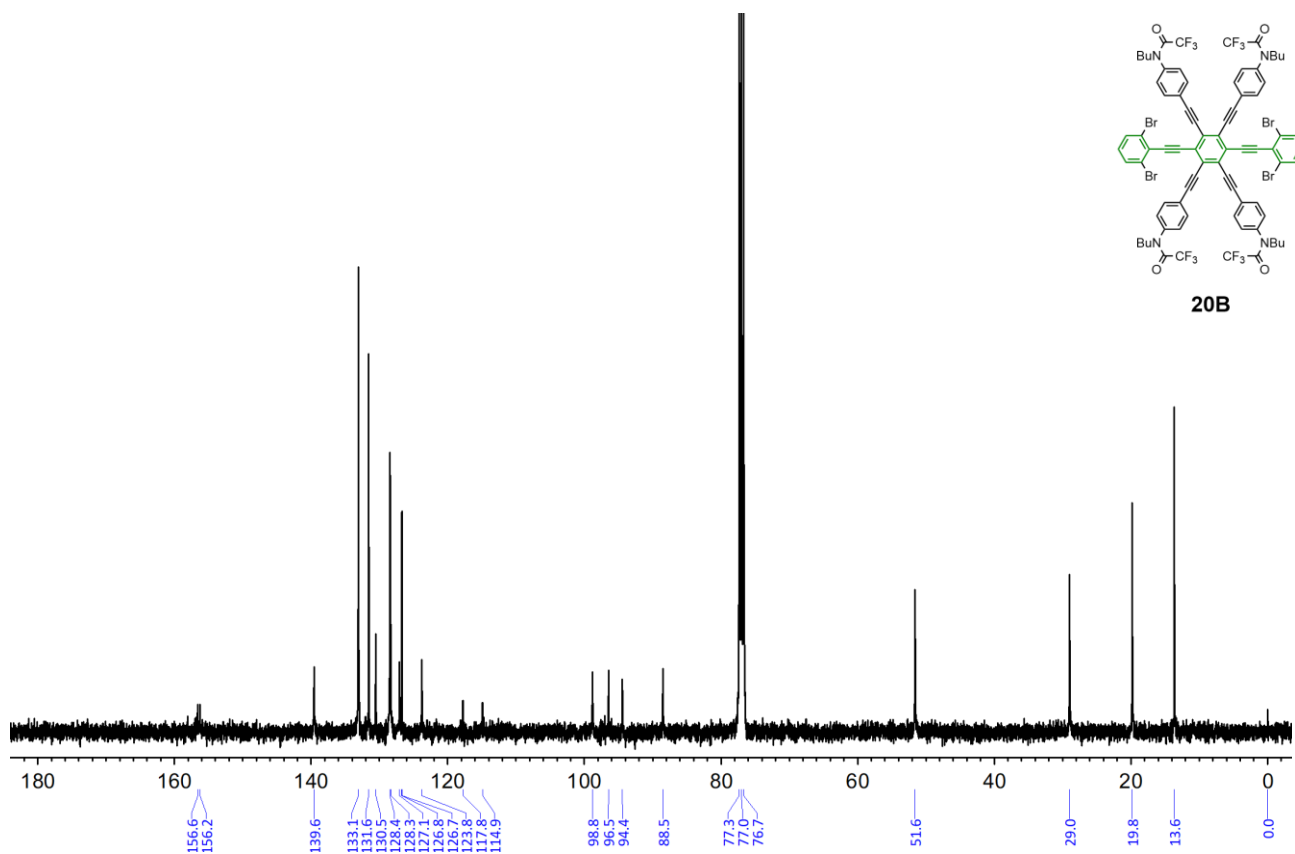

$^{13}\text{C}$  NMR spectrum (100 MHz) of **20B**, measured in  $\text{CDCl}_3$  at room temperature.

Data Name: common/Nov21\_a51302-  
Sample: u1 katoono / 20Bo387  
Experiment Date/Time: 2023/11/21 10:09:02

Instrument:JMST-100GCV, Ionization Mode: 1:FD+  
Acquired m/z Range: 40..6400  
Spectrum Time Range: Average(MS[1] Time:0.47)

MS Tune Method Name: FD  
GC:Agilent7890A, Method: -  
Detector Volt: 2300[V]

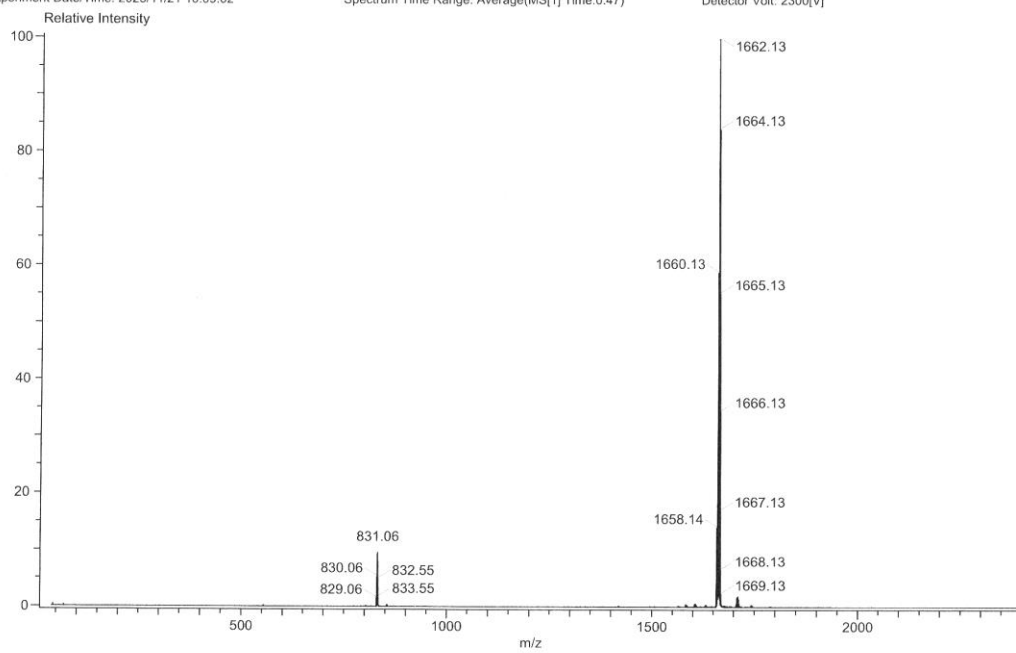

LRMS (FD) of **20B**.

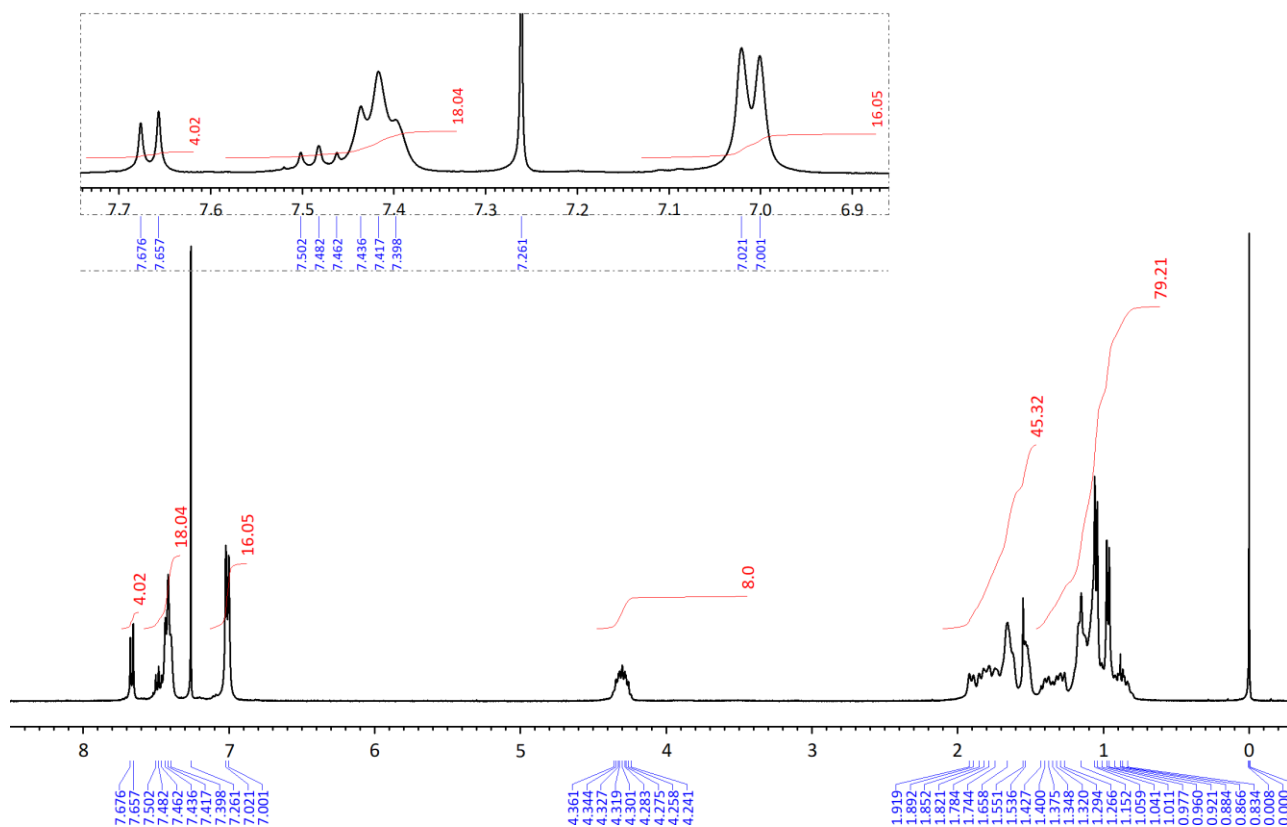

<sup>1</sup>H NMR spectrum (400 MHz) of pr-5, measured in CDCl<sub>3</sub> at room temperature.

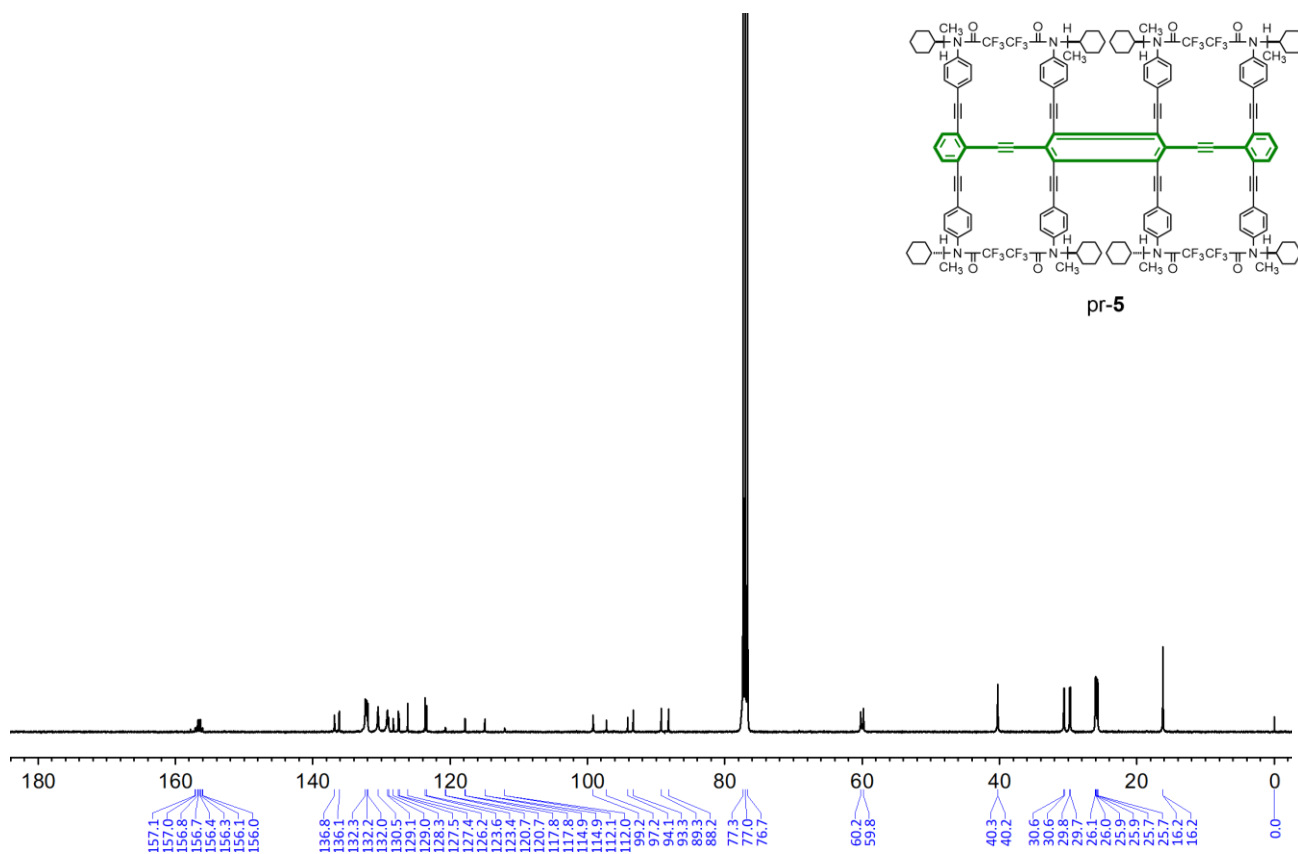

<sup>13</sup>C NMR spectrum (100 MHz) of pr-5, measured in CDCl<sub>3</sub> at room temperature.

Data Name: common/Nov21-a51299-  
Sample: u1 katoono / pr5o409  
Experiment Date/Time: 2023/11/21 9:50:15

Instrument:JMST-100GCV, Ionization Mode: 1:FD+  
Acquired m/z Range: 40. 6400  
Spectrum Time Range: Average(MS[1] Time:0.43. 0.46)

MS Tune Method Name: FD  
GC:Agilent7890A, Method: -  
Detector Volt: 2300[V]

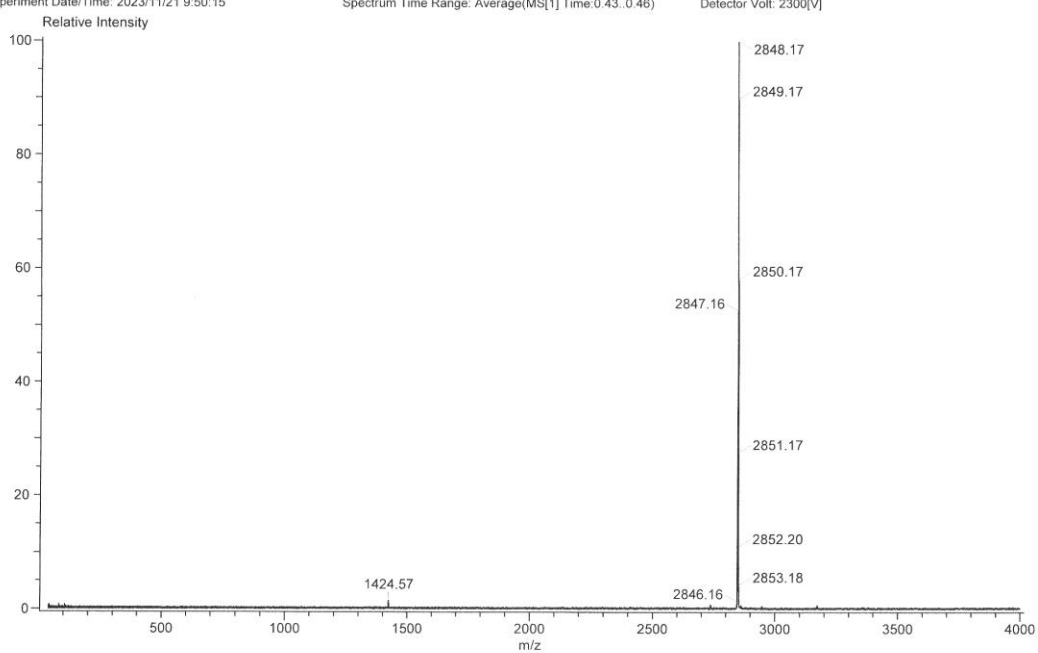

LRMS (FD) of pr-5.





Data Name: common/Nov21\_a51298-  
Sample: u1 katoono / pr5B0408  
Experiment Date/Time: 2023/11/21 10:28:49

Instrument:JMST-100GCV, Ionization Mode: 1:FD+  
Acquired m/z Range: 40..6400  
Spectrum Time Range: Average(MS[1]) Time:0.43..0.47)

MS Tune Method Name: FD  
GC:Agilent7890A, Method: -  
Detector Volt: 2300[V]

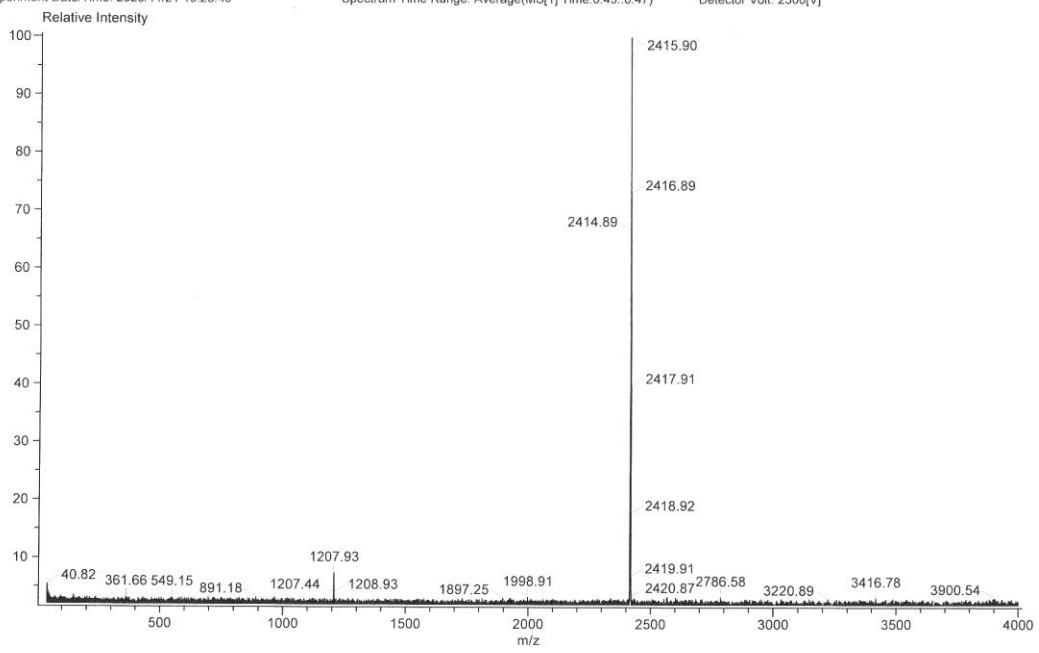

LRMS (FD) of pr-5B.

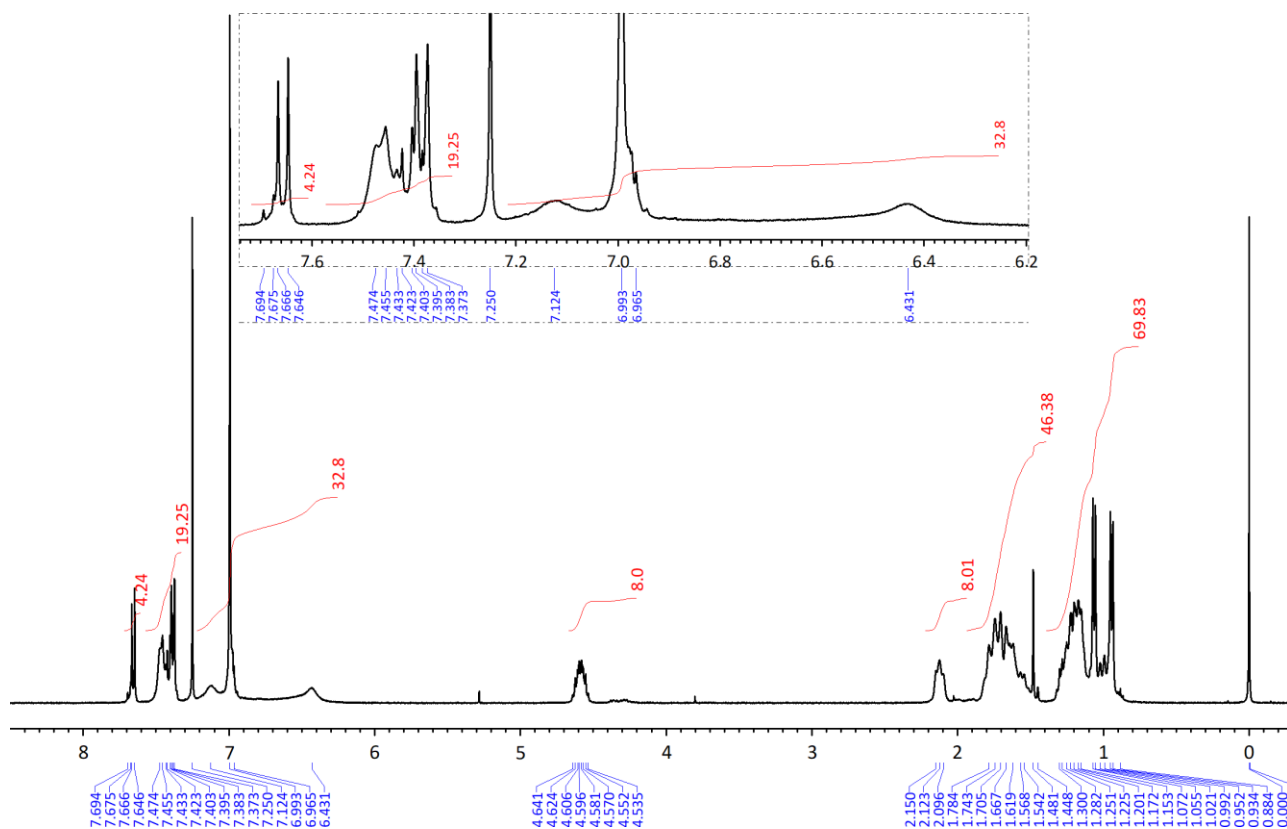

<sup>1</sup>H NMR spectrum (400 MHz) of **5**, measured in CDCl<sub>3</sub> at 323 K.

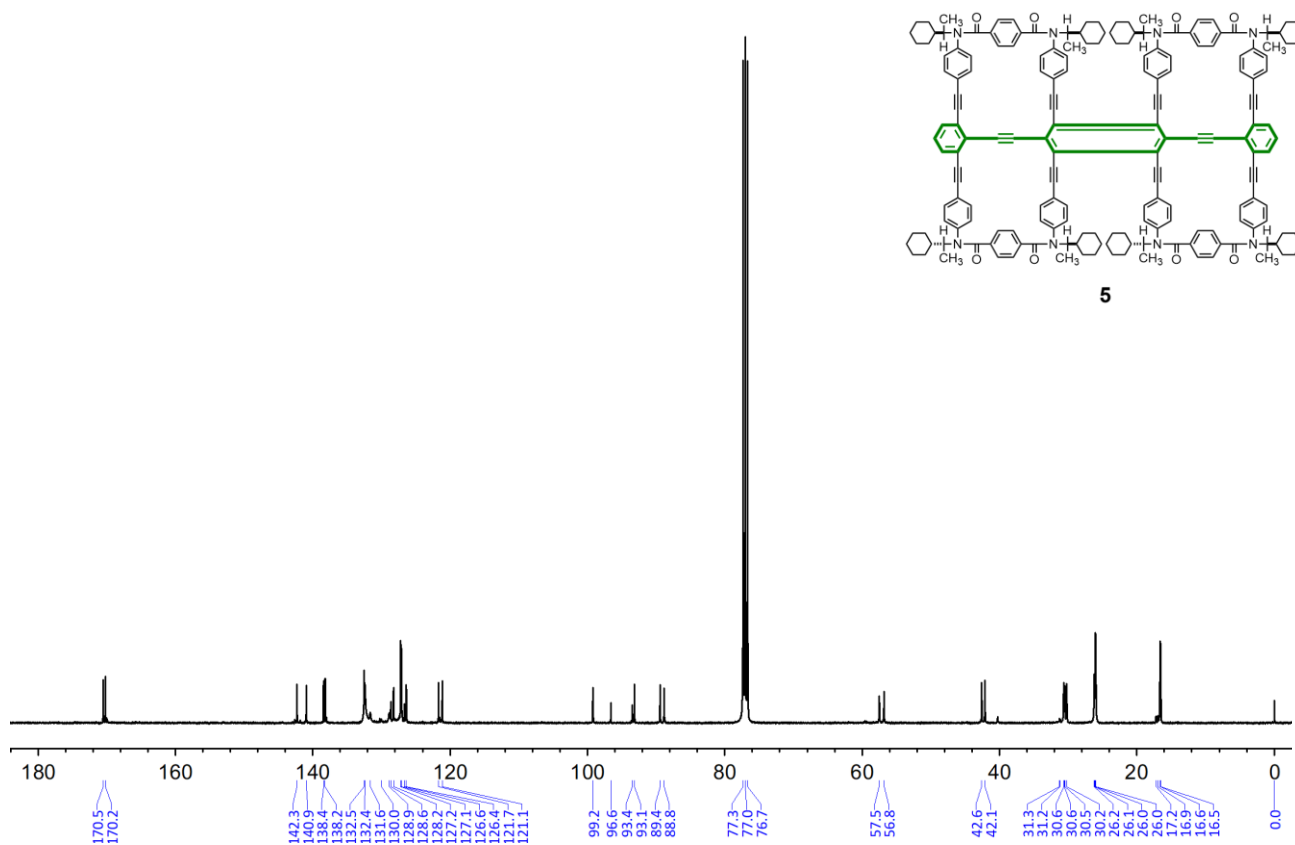

<sup>13</sup>C NMR spectrum (100 MHz) of **5**, measured in CDCl<sub>3</sub> at 313 K.

Data Name: common/Dec26 a51295-15  
Sample: u1 katoono / 5o414  
Experiment Date/Time: 2023/12/26 16:18:58

Instrument:JMST-100GCV, Ionization Mode: 1:FD+  
Acquired m/z Range: 40..3200  
Spectrum Time Range: Average(MS[1] Time:0.48)

MS Tune Method Name: FD  
GC:Agilent7890A, Method: -  
Detector Volt: 2600[V]

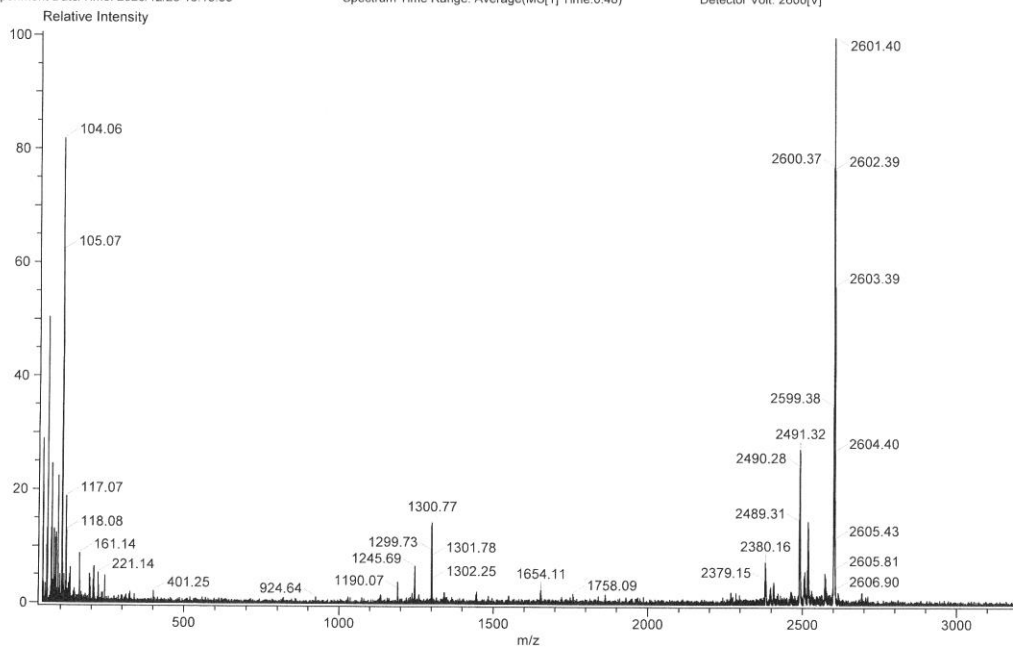

LRMS (FD) of 5.

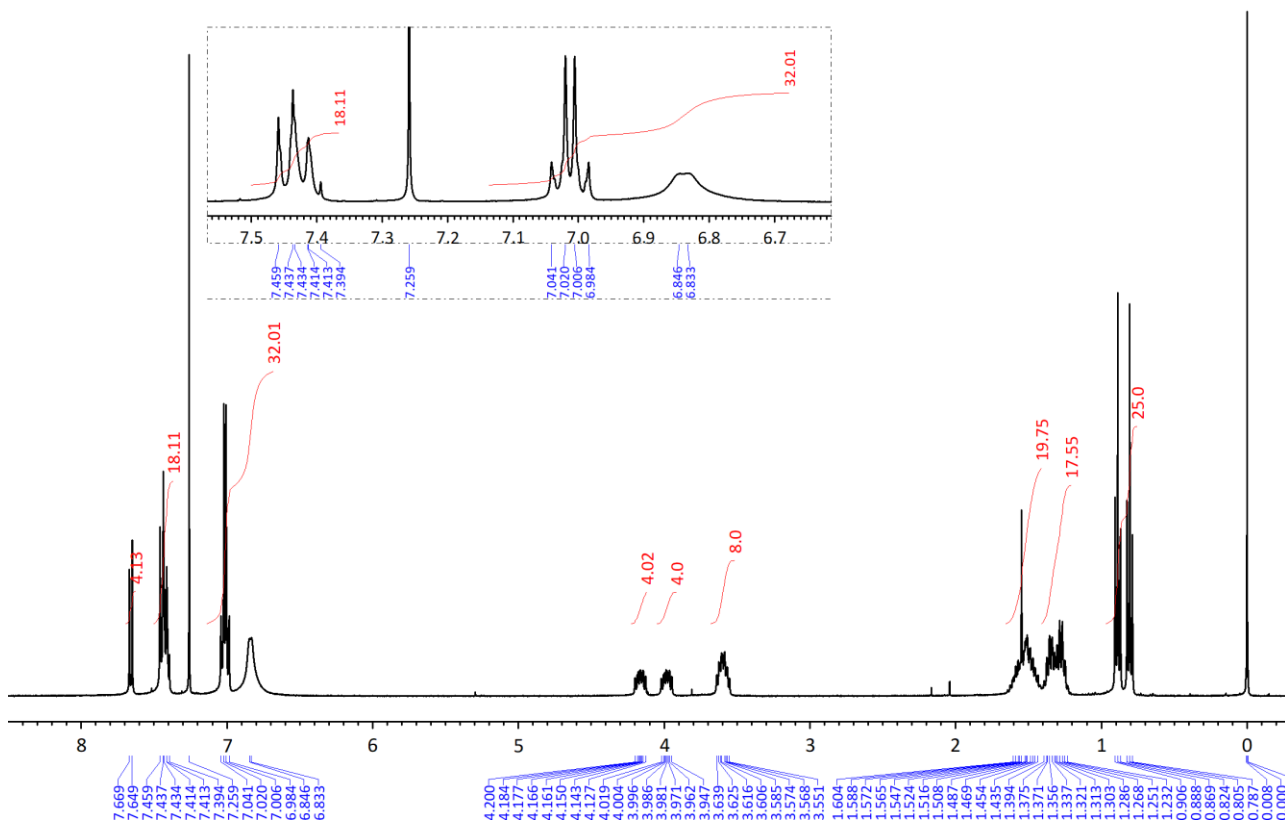

$^1\text{H}$  NMR spectrum (400 MHz) of **5B**, measured in  $\text{CDCl}_3$  at 303 K.

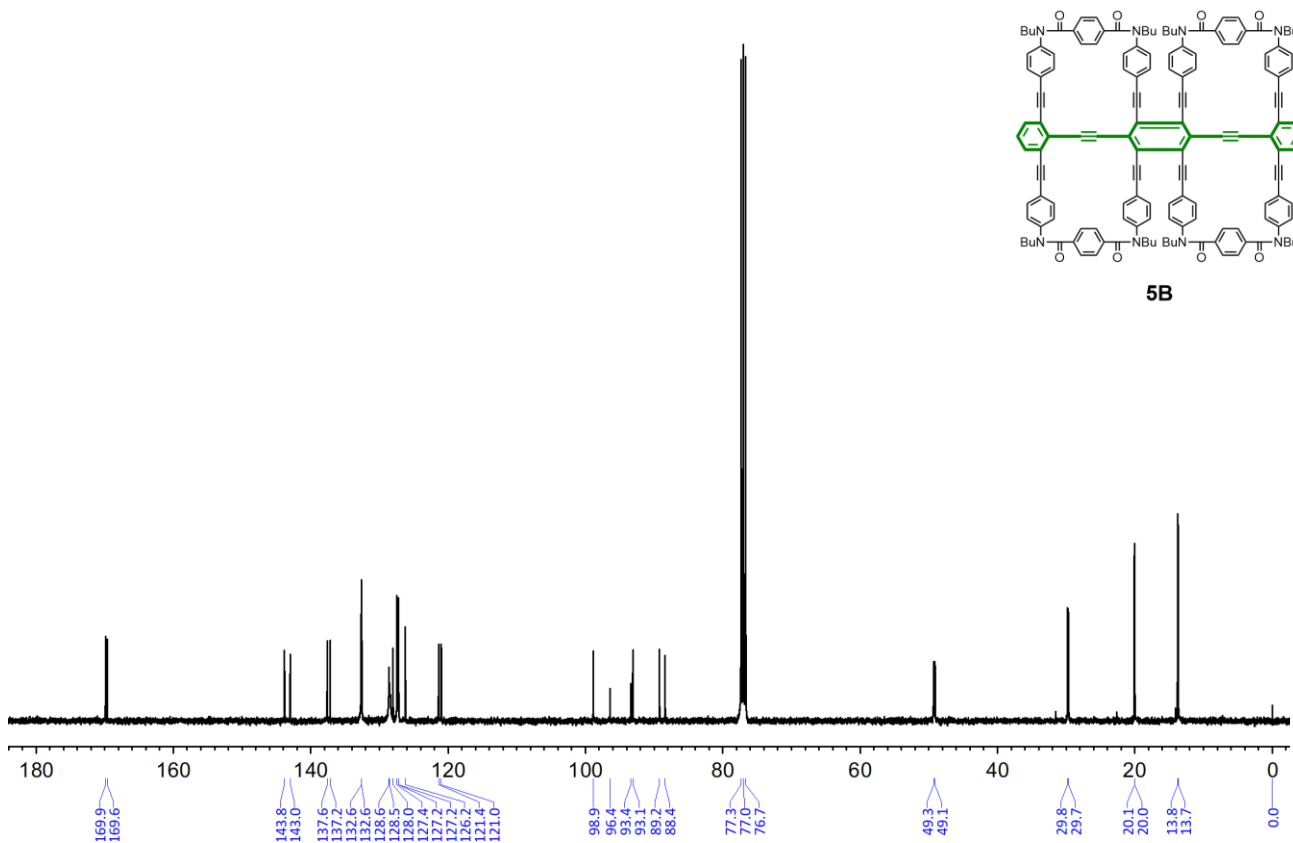

$^{13}\text{C}$  NMR spectrum (100 MHz) of **5B**, measured in  $\text{CDCl}_3$  at room temperature.

Data Name: common/Nov21-a51294-  
Sample: u1 katoono / 5Bo412  
Experiment Date/Time: 2023/11/21 10:16:04

Instrument:JMST-100GCV, Ionization Mode: 1:FD+  
Acquired m/z Range: 40..6400  
Spectrum Time Range: Average(MS[1] Time:0.50..0.51)

MS Tune Method Name: FD  
GC:Agilent7890A, Method: -  
Detector Volt: 2300[V]

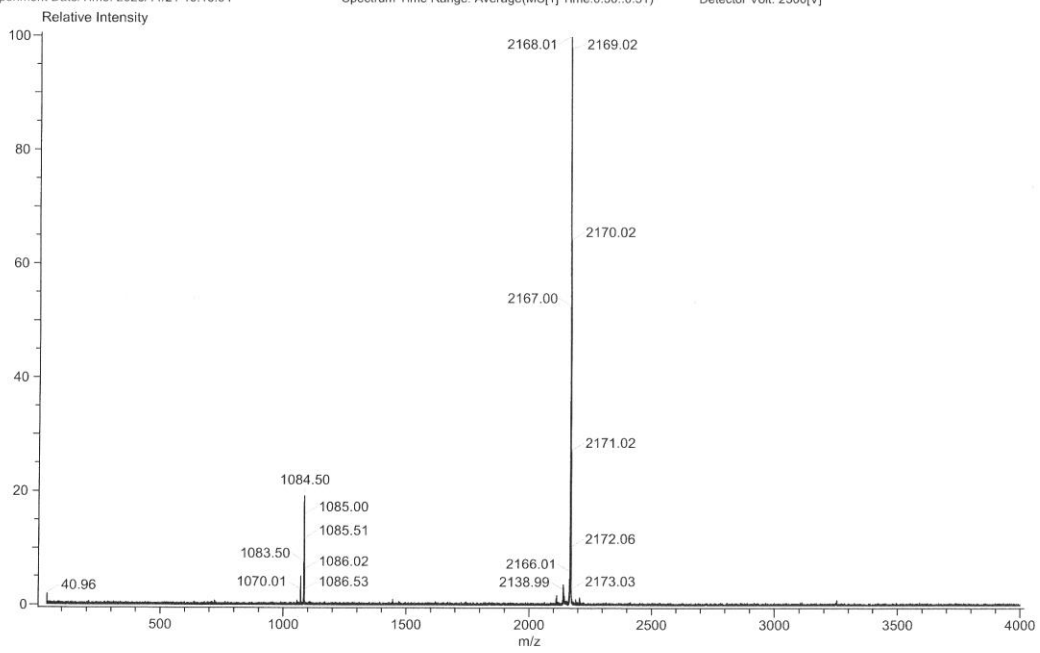

LRMS (FD) of **5B**.

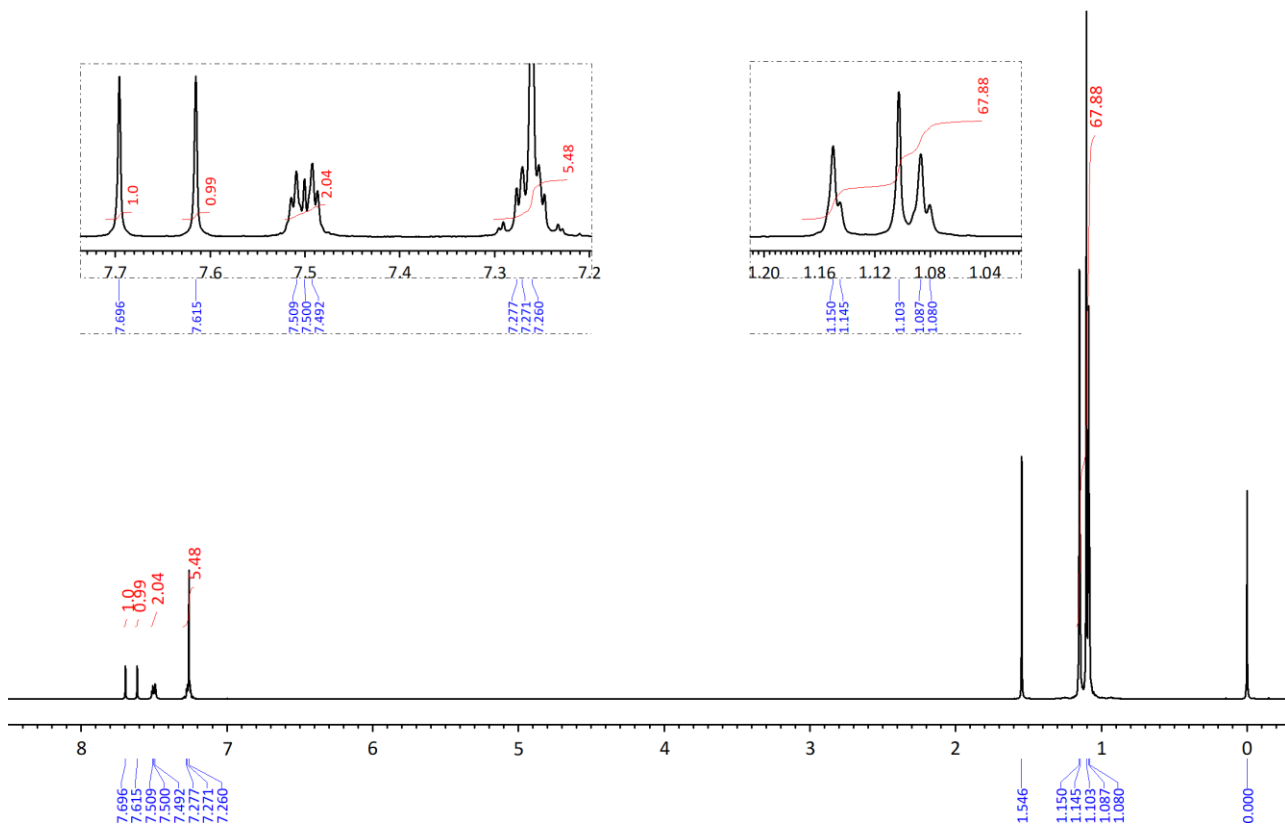

<sup>1</sup>H NMR spectrum (400 MHz) of **26**, measured in CDCl<sub>3</sub> at room temperature.

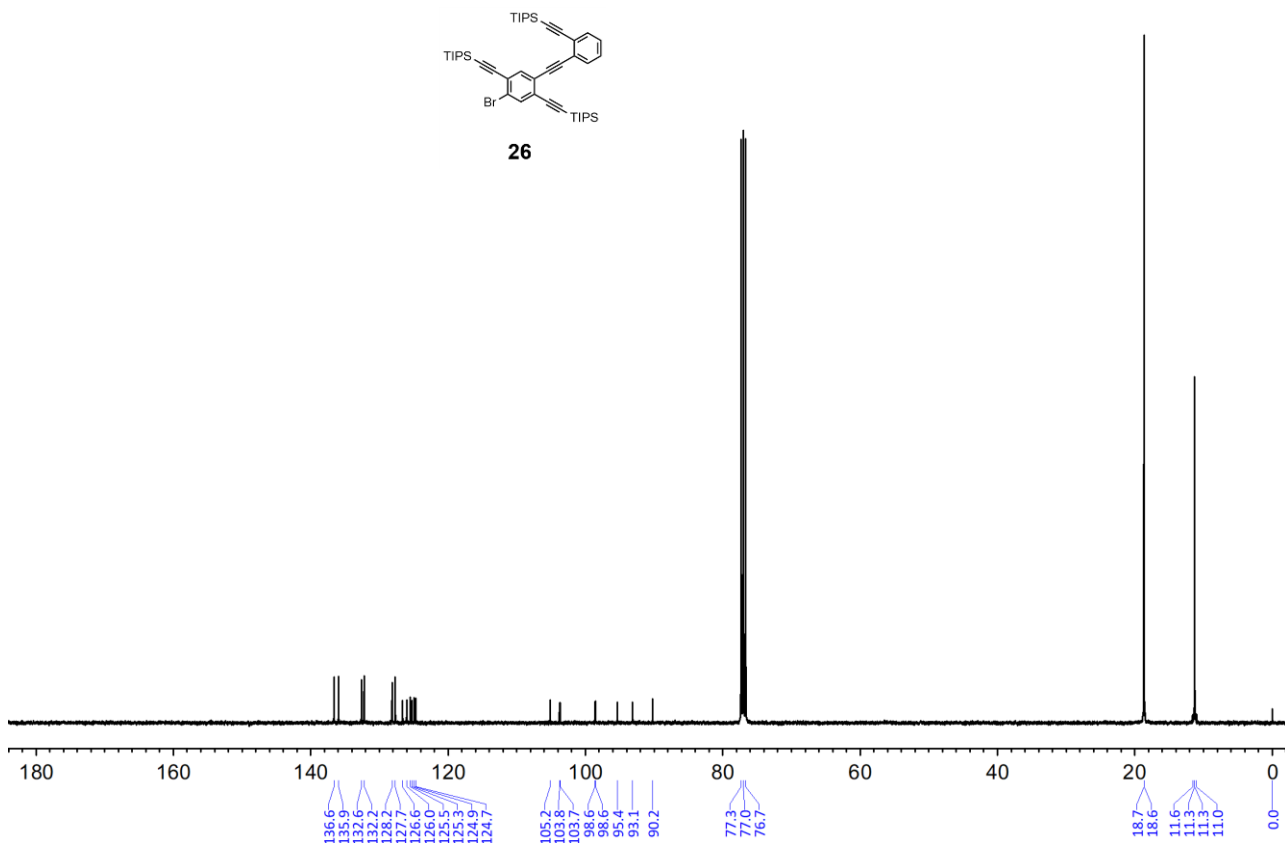

<sup>13</sup>C NMR spectrum (100 MHz) of **26**, measured in CDCl<sub>3</sub> at room temperature.

Data Name: common/Sep28.a51209-  
Sample: u1 katono / 796  
Experiment Date/Time: 2023/09/28 10:11:12

Instrument: JMST-100GCV, Ionization Mode: 1:FD+  
Acquired m/z Range: 40\_3200  
Spectrum Time Range: Average(MS[1]) Time: 0.31)

MS Tune Method Name: FD  
GC: Agilent7890A, Method: -  
Detector Volt: 2300[V]

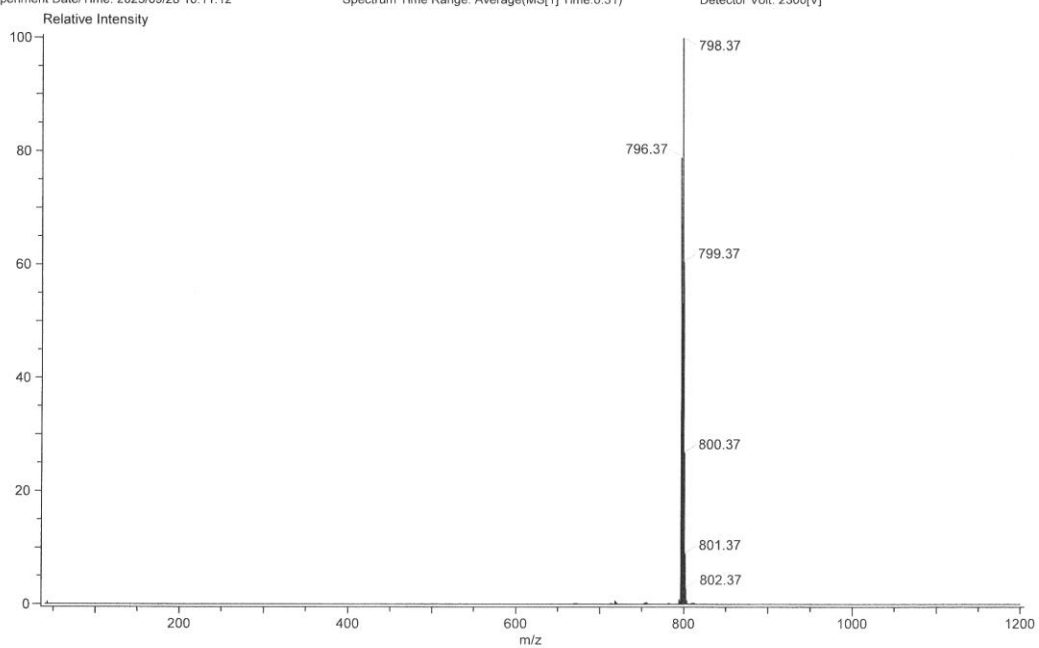

LRMS (FD) of 26.



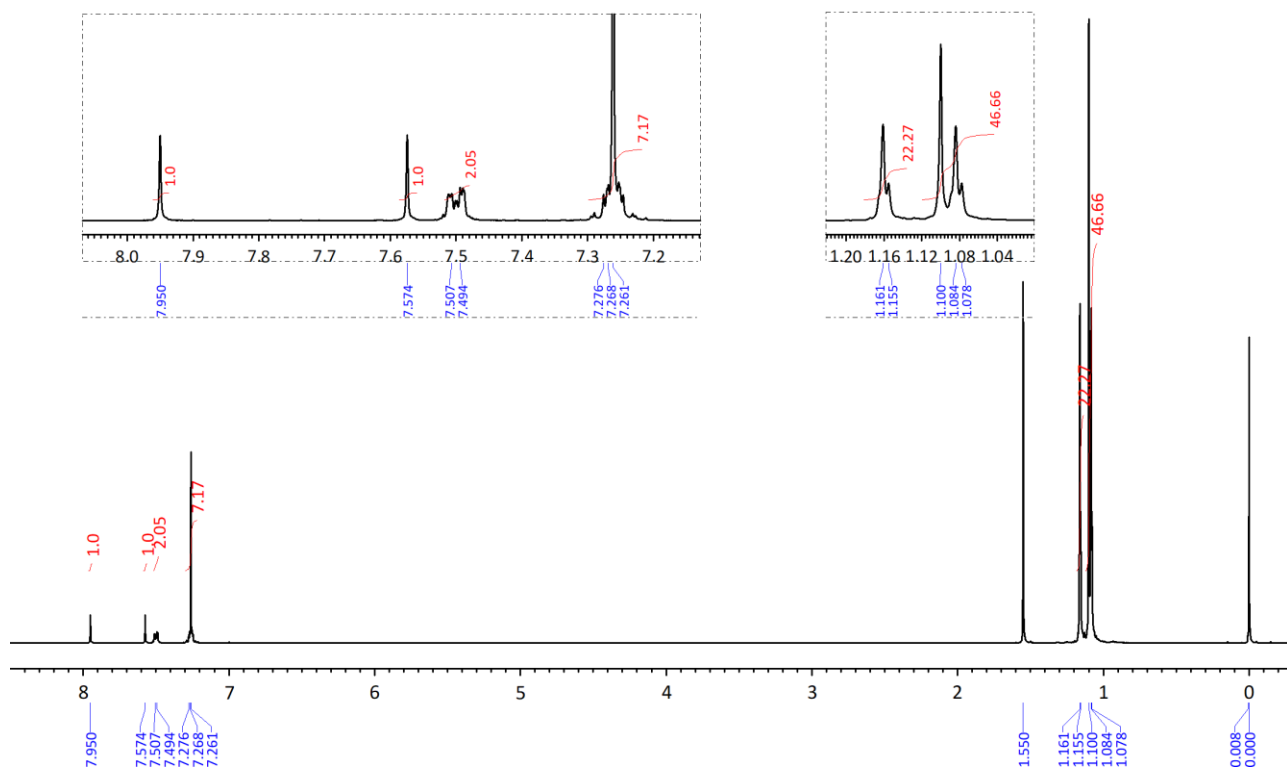

<sup>1</sup>H NMR spectrum (400 MHz) of **27**, measured in CDCl<sub>3</sub> at room temperature.

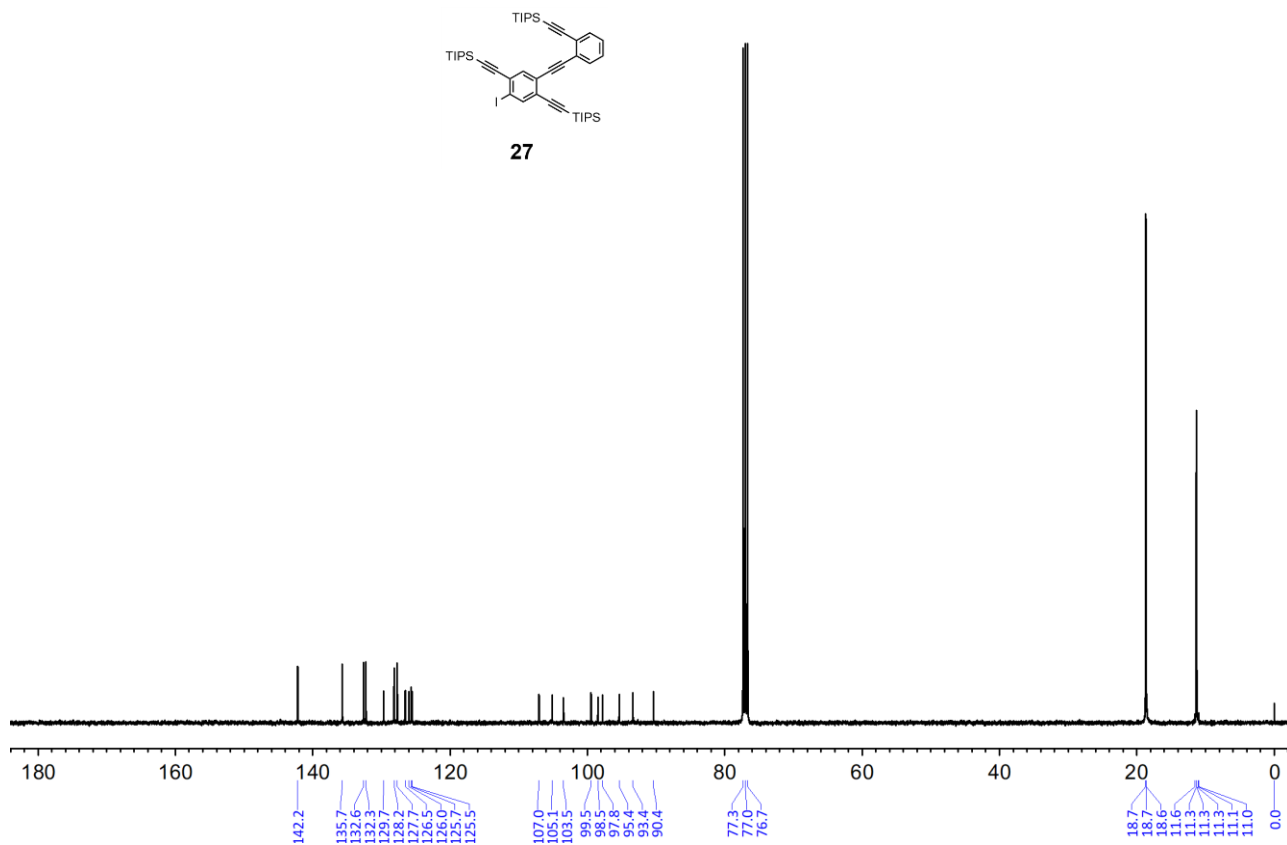

<sup>13</sup>C NMR spectrum (100 MHz) of **27**, measured in CDCl<sub>3</sub> at room temperature.

Data Name: common/Sep28.a51210-  
Sample: u1 kalone / 1065  
Experiment Date/Time: 2023/09/28 10:18:41

Instrument: JMST-100GCV, Ionization Mode: 1:FD+  
Acquired m/z Range: 40..3200  
Spectrum Time Range: Average(MS[1]) Time:0.35)

MS Tune Method Name: FD  
GC: Agilent7890A, Method: -  
Detector Volt: 2300[V]

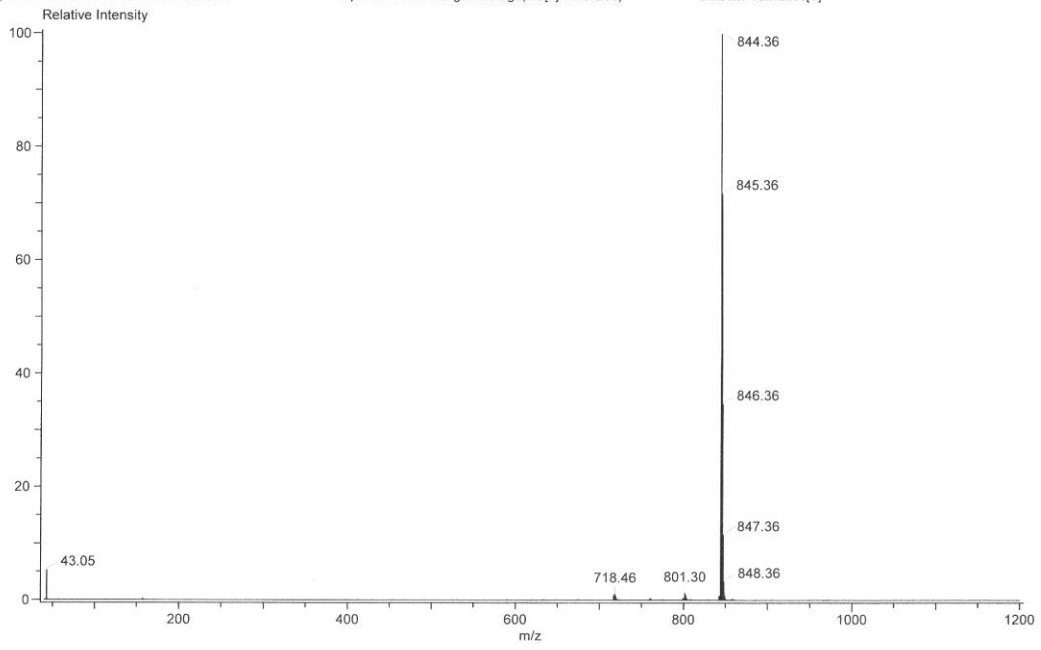

LRMS (FD) of **27**.

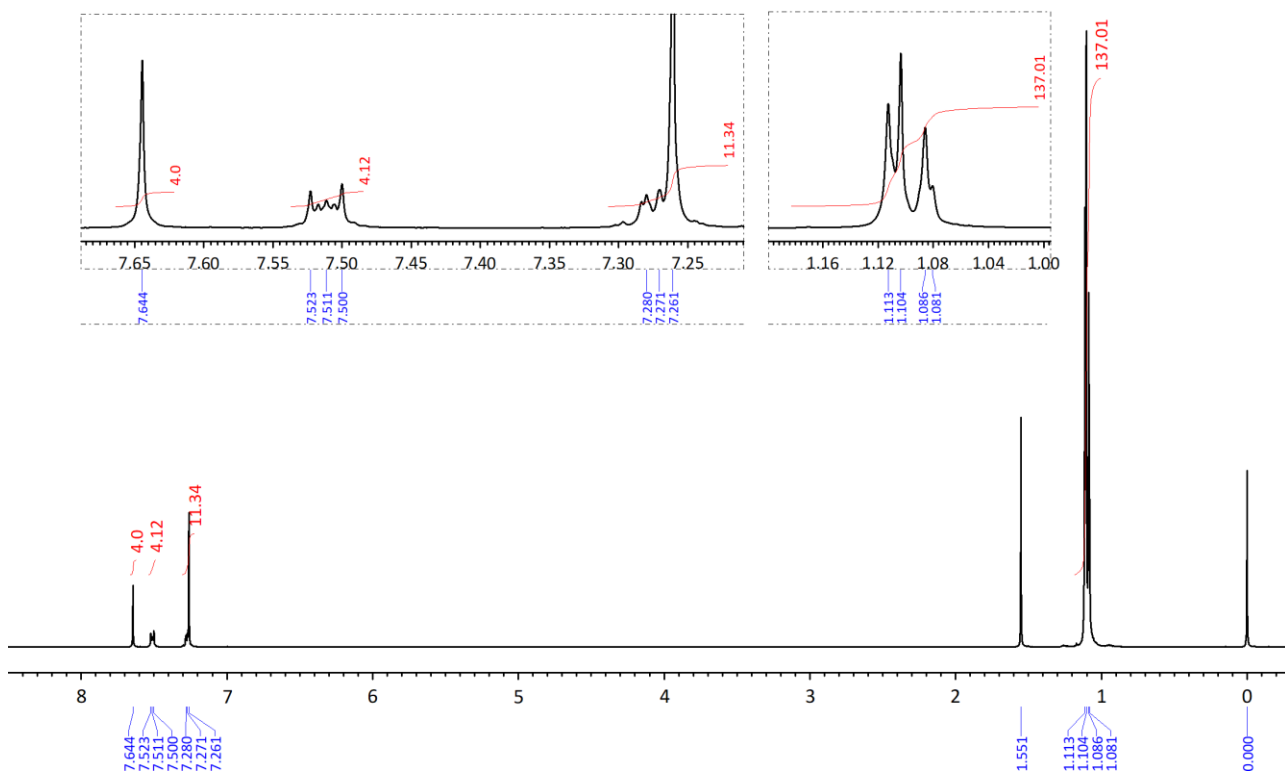

<sup>1</sup>H NMR spectrum (400 MHz) of **28**, measured in CDCl<sub>3</sub> at room temperature.

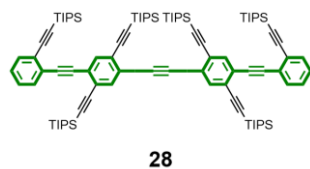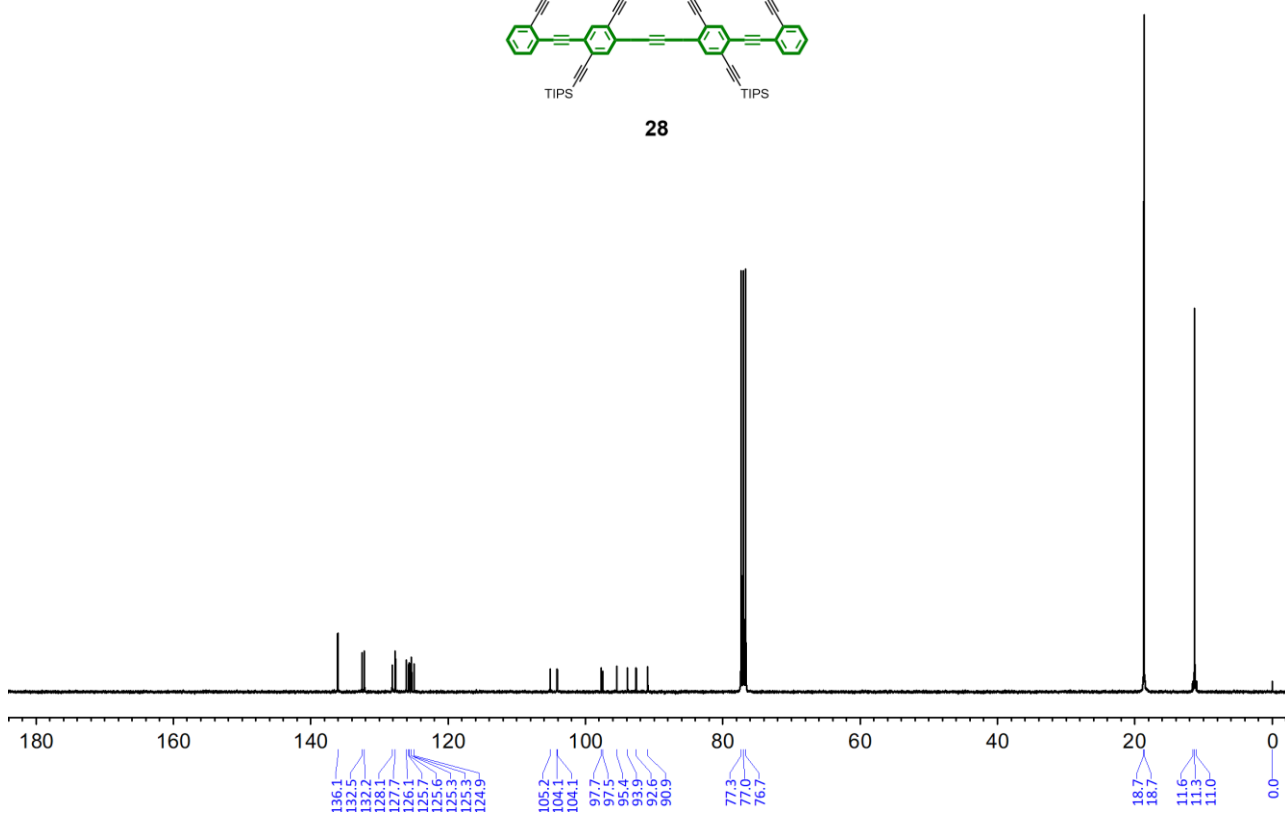

<sup>13</sup>C NMR spectrum (100 MHz) of **28**, measured in CDCl<sub>3</sub> at room temperature.

Data Name: common/Sep28.a51211-  
Sample: u1 katonu / 1067  
Experiment Date/Time: 2023/09/28 10:28:12

Instrument:JMST-100GCV, Ionization Mode: 1:FD+  
Acquired m/z Range: 40. 3200  
Spectrum Time Range: Average(MS[1] Time 0.44)

MS Tune Method Name: FD  
GC:Agilent7890A, Method: -  
Detector Volt: 2300[V]

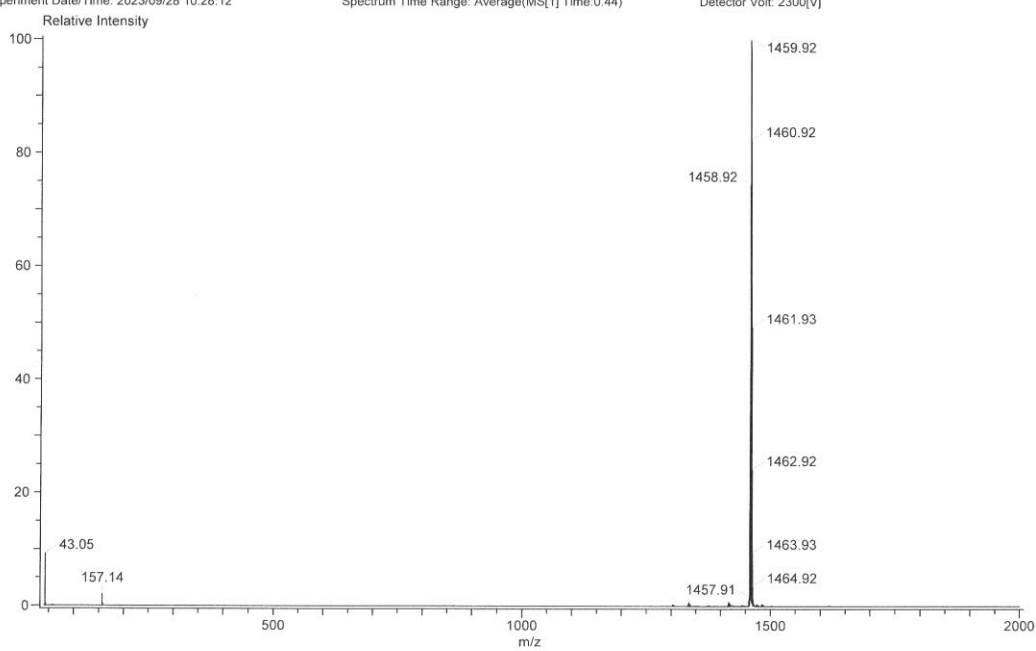

LRMS (FD) of **28**.

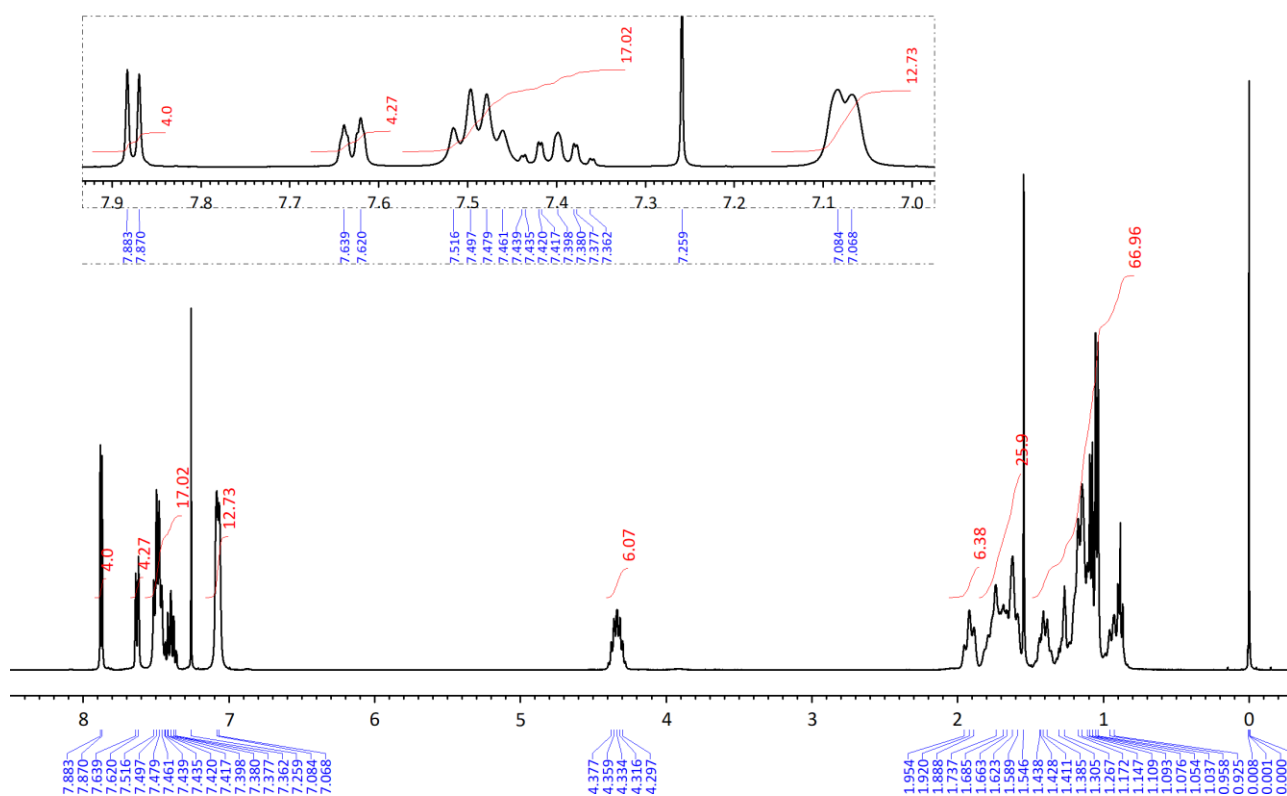

<sup>1</sup>H NMR spectrum (400 MHz) of pr-6, measured in CDCl<sub>3</sub> at room temperature.

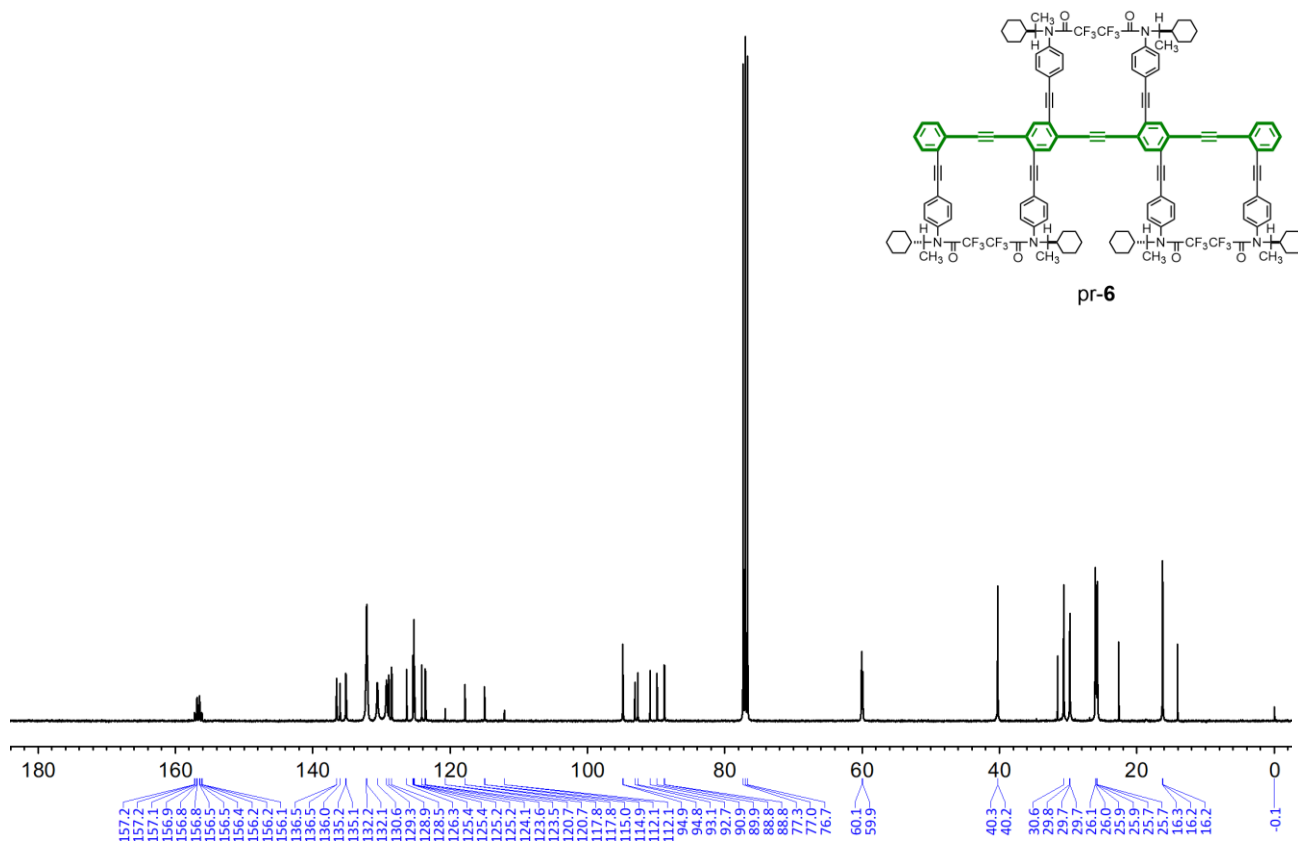

<sup>13</sup>C NMR spectrum (100 MHz) of pr-6, measured in CDCl<sub>3</sub> at 303 K.

Data Name: common/Sep28.a51212-  
Sample: u1 kato / 1071  
Experiment Date/Time: 2023/09/28 12:11:04

Instrument:JMST-100GCV, Ionization Mode: 1:FD+  
Acquired m/z Range: 40. 3200  
Spectrum Time Range: Average(MS[1]) Time:0.45. 0.46)

MS Tune Method Name: FD  
GC:Agilent7890A, Method: -  
Detector Volt: 2300[V]

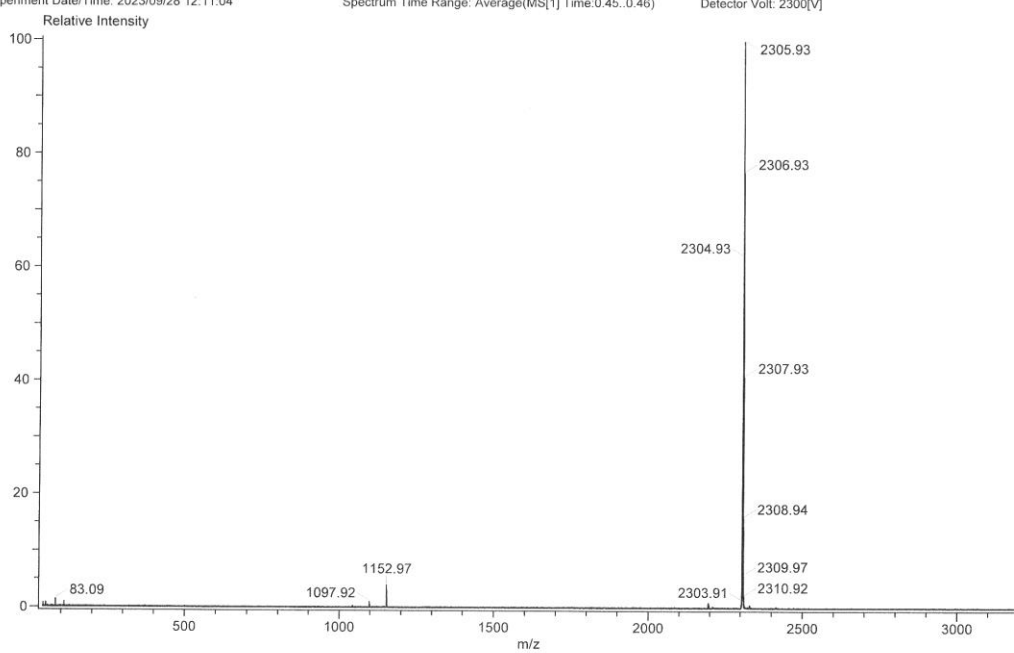

LRMS (FD) of pr-6.

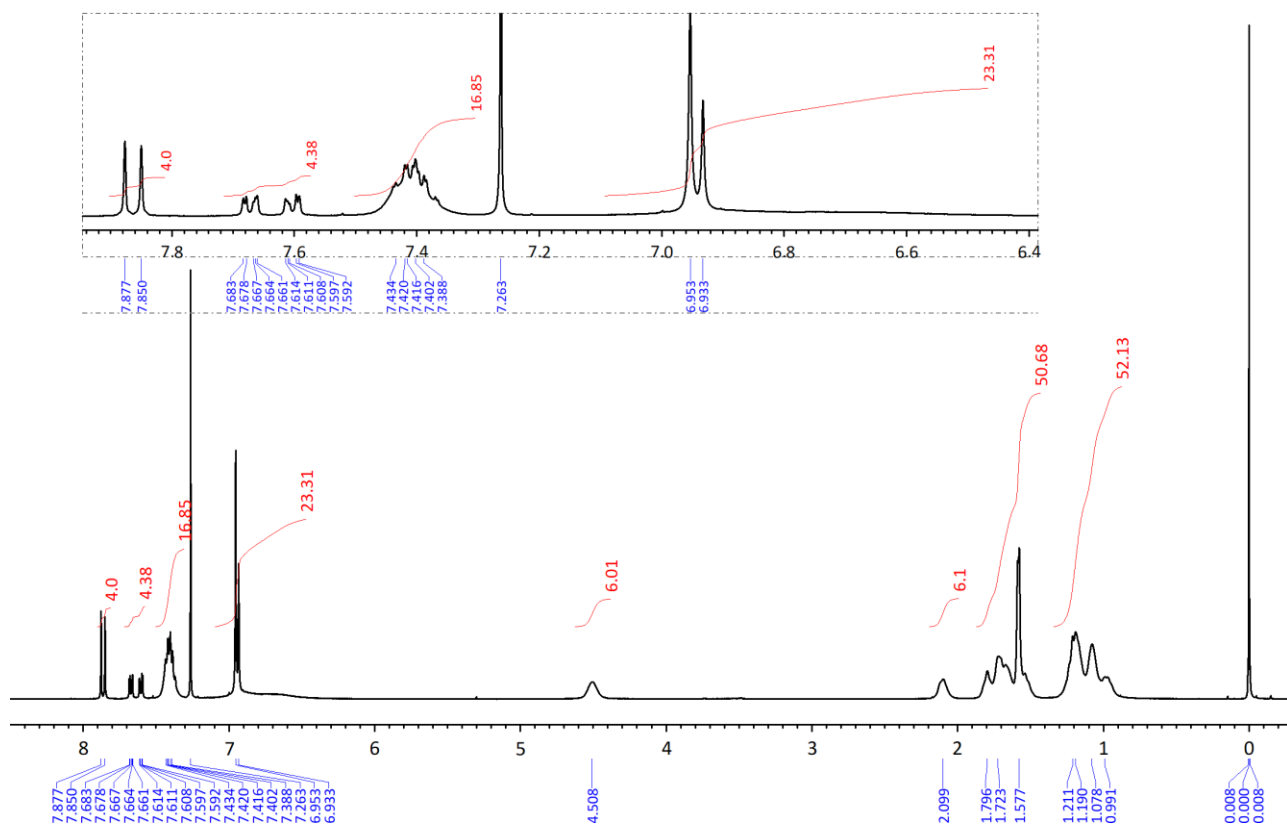

<sup>1</sup>H NMR spectrum (400 MHz) of **6**, measured in CDCl<sub>3</sub> at 303 K.

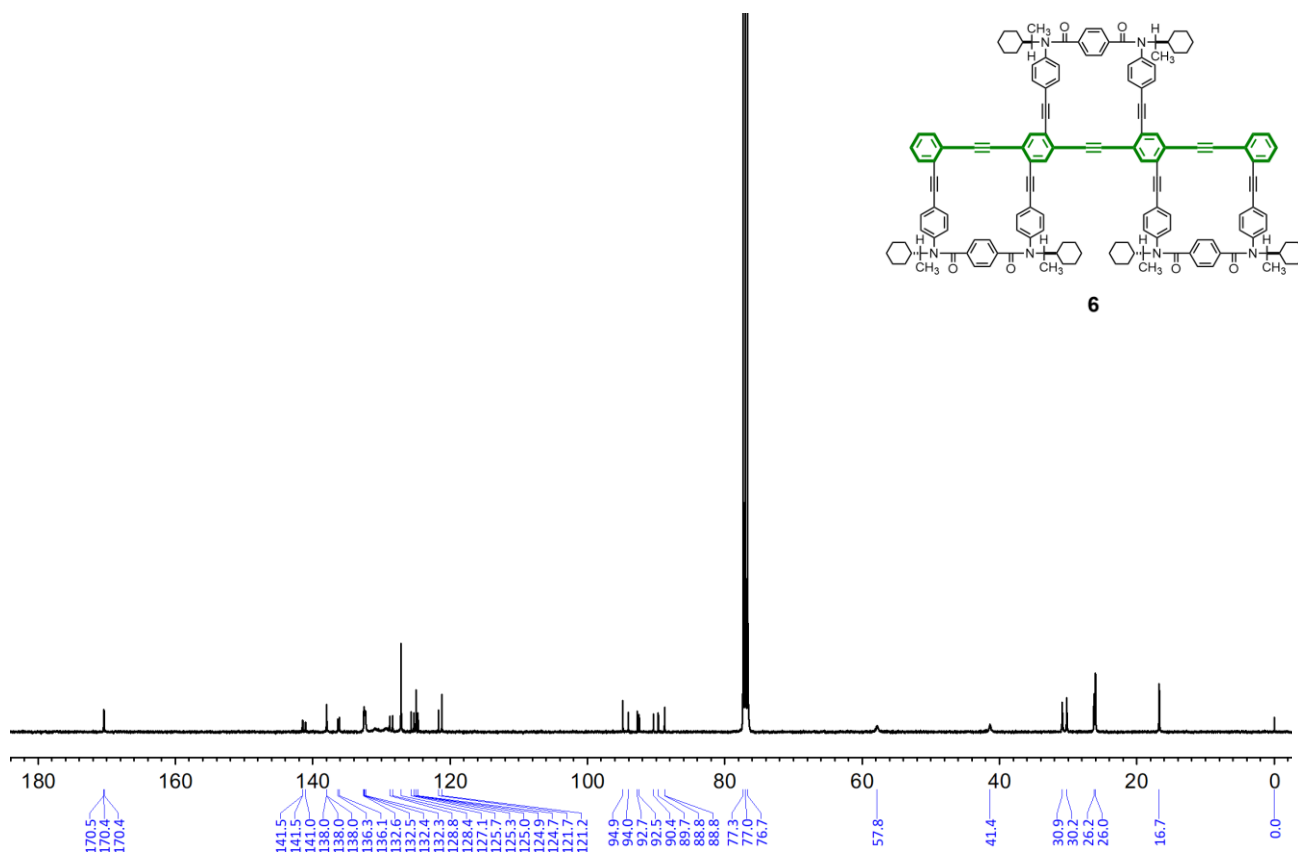

<sup>13</sup>C NMR spectrum (100 MHz) of **6**, measured in CDCl<sub>3</sub> at 303 K.

Data Name: common/Oct10\_a51213-  
Sample: u1 katoono / 1080  
Experiment Date/Time: 2023/10/10 11:52:46

Instrument: JMST-100GCV, Ionization Mode: 1:FD+  
Acquired m/z Range: 40. 3200  
Spectrum Time Range: Average(MS[1]) Time:0.24..0.29

MS Tune Method Name: FD  
GC: Agilent7890A, Method: -  
Detector Volt: 2500[V]

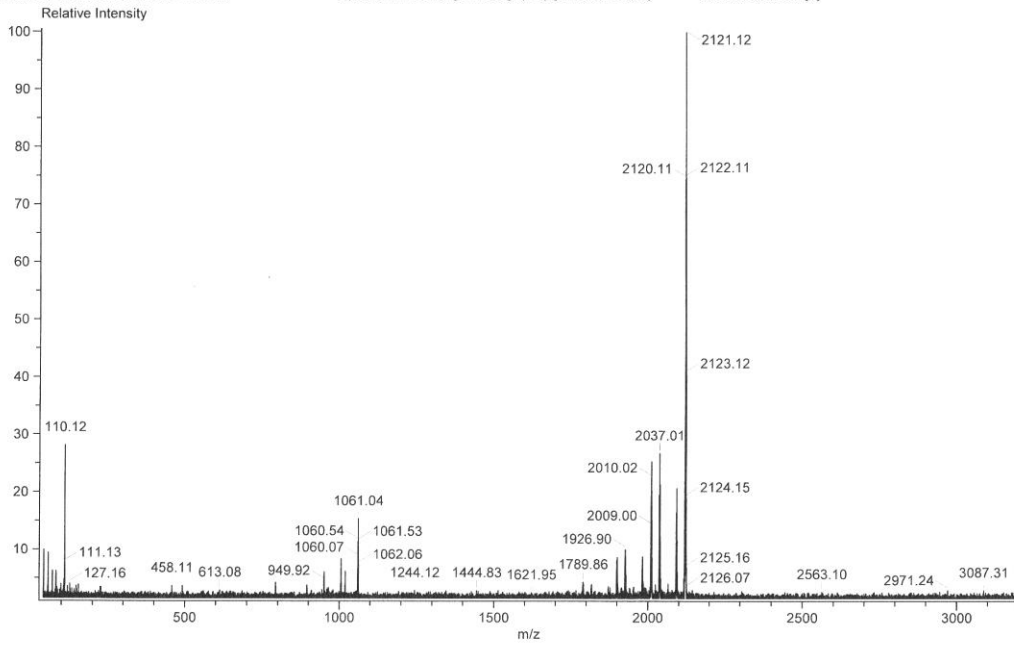

LRMS (FD) of 6.



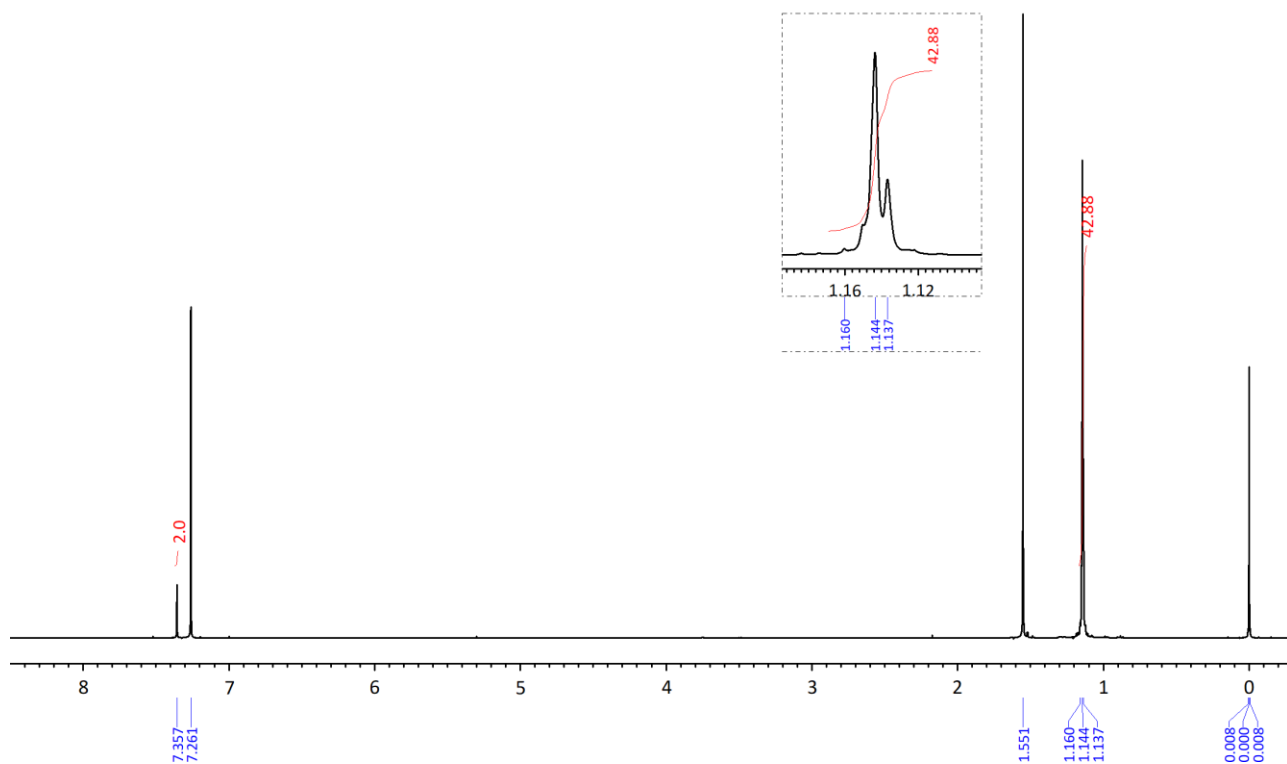

$^1\text{H}$  NMR spectrum (400 MHz) of **29**, measured in  $\text{CDCl}_3$  at room temperature.

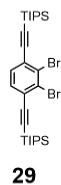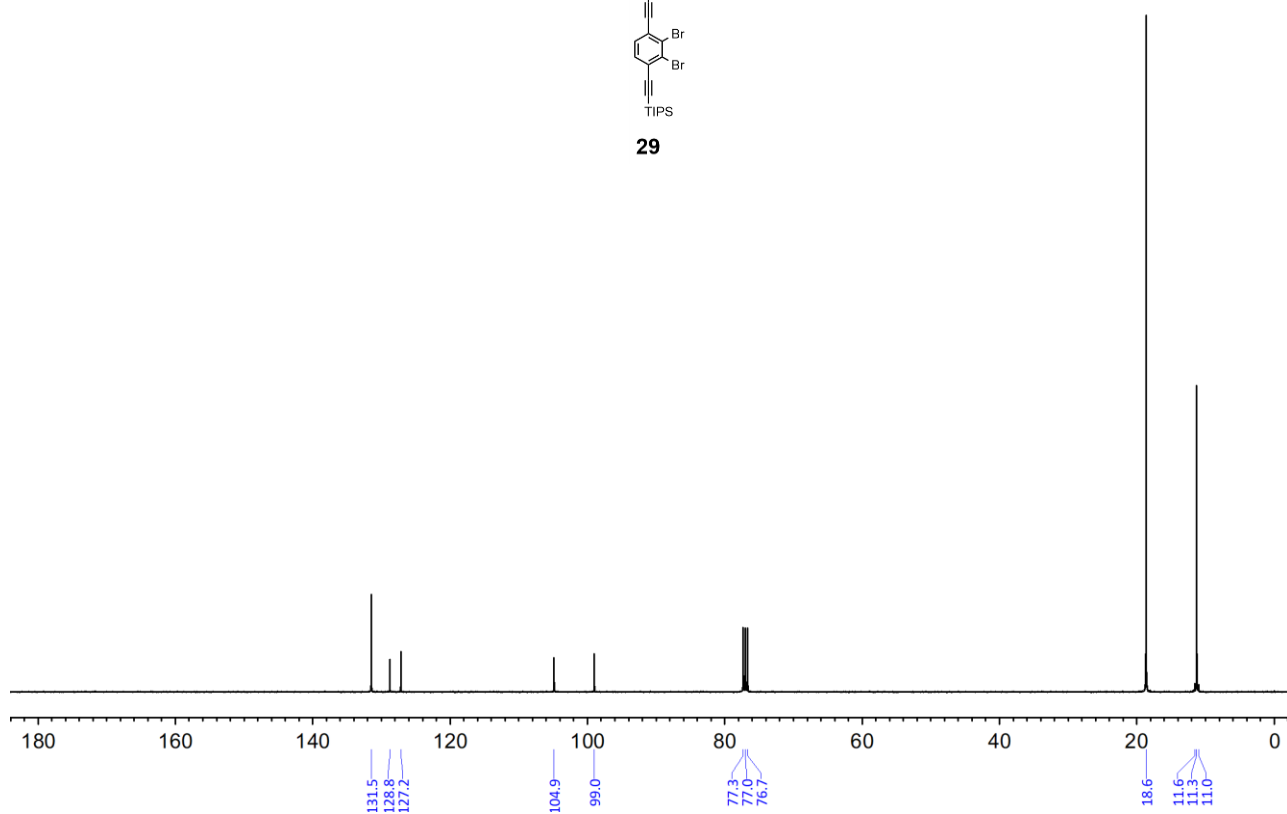

$^{13}\text{C}$  NMR spectrum (100 MHz) of **29**, measured in  $\text{CDCl}_3$  at room temperature.

Data: common/May30:a90113-  
Sample: 3396 Aoki / HA003-02  
Experiment Date/Time: 2017/05/30 12:48:49  
Average(MS[1] Time:0.28)

Instrument Configuration: FDプローブ,JMS-T100GCV  
Ionization Mode: FD+  
Acquired m/z Range: 20.00..1600.00  
Detector Volt: 2300[V]

MS Tune Method Name: FD  
Agilent7890A Method Name: -

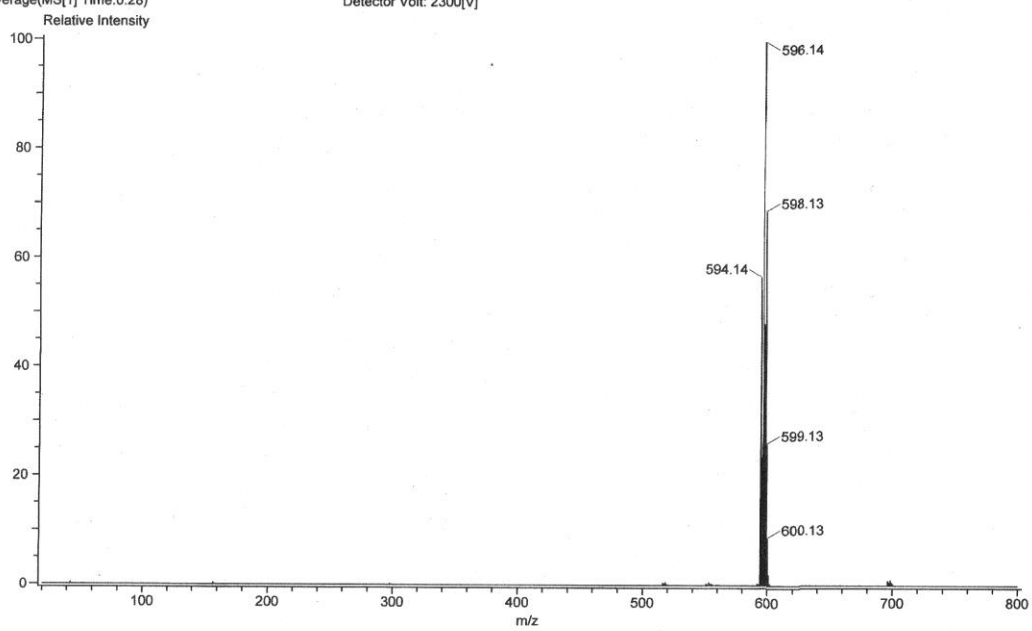

LRMS (FD) of **29**.

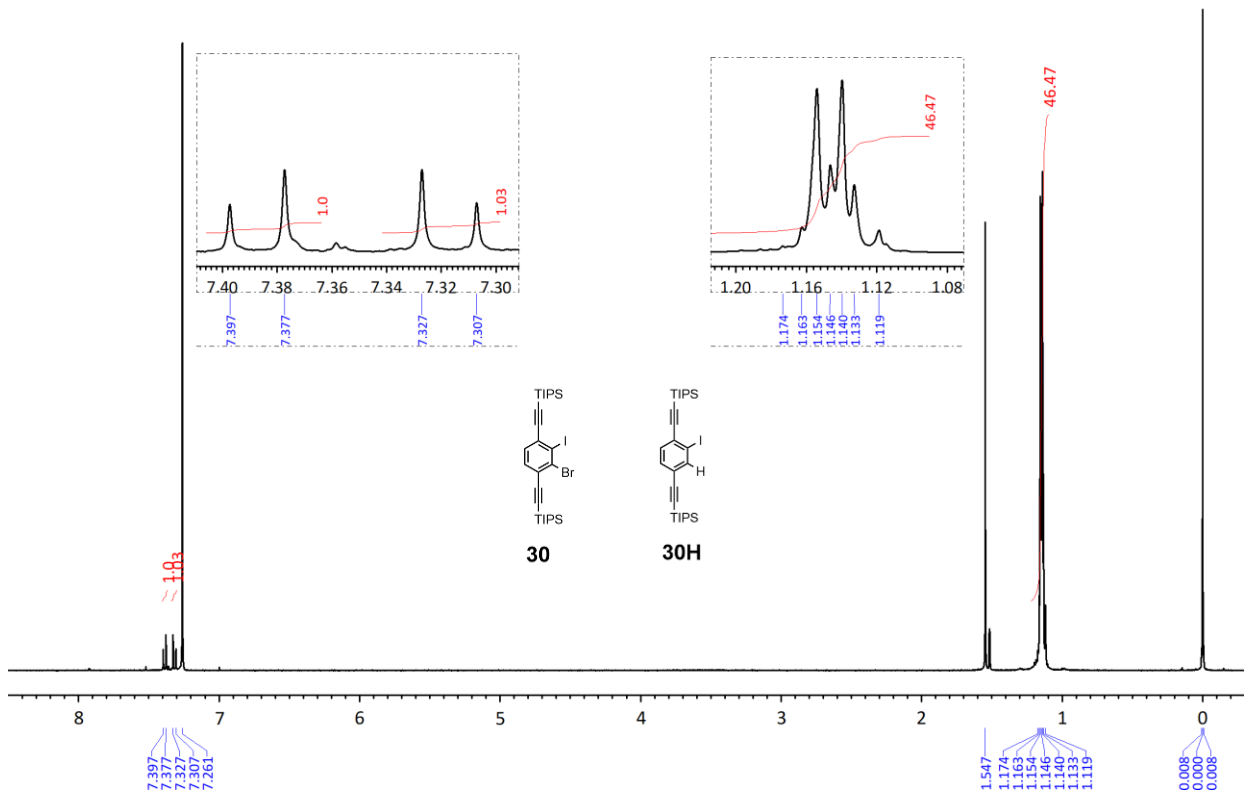

$^1\text{H}$  NMR spectrum (400 MHz) of **30/30H**, measured in  $\text{CDCl}_3$  at room temperature.

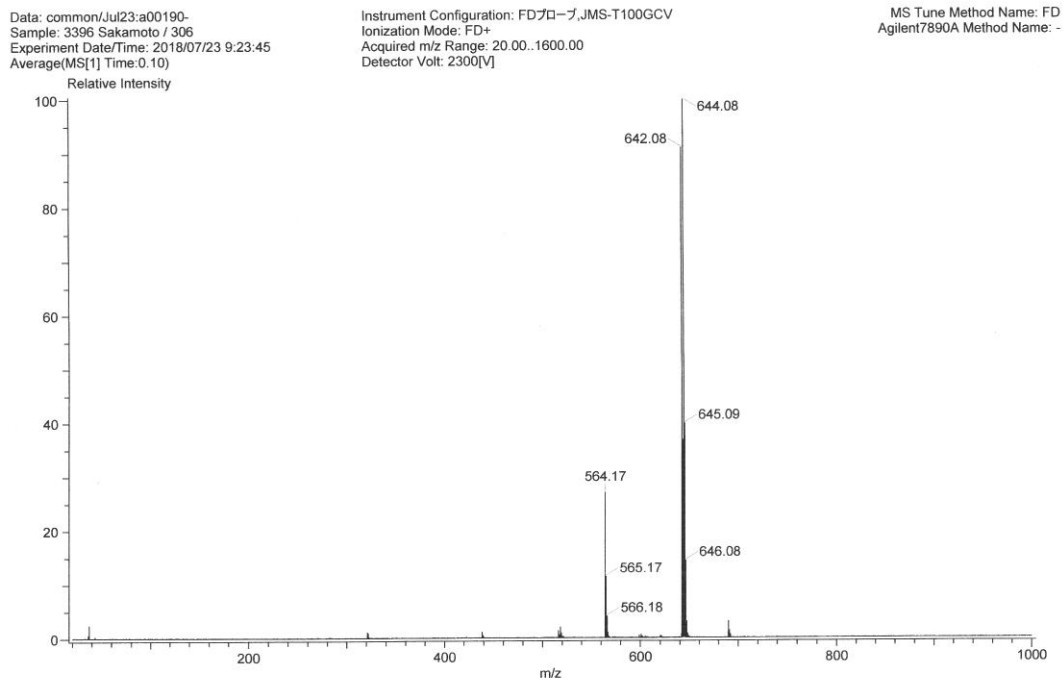

LRMS (FD) of **30/30H**.

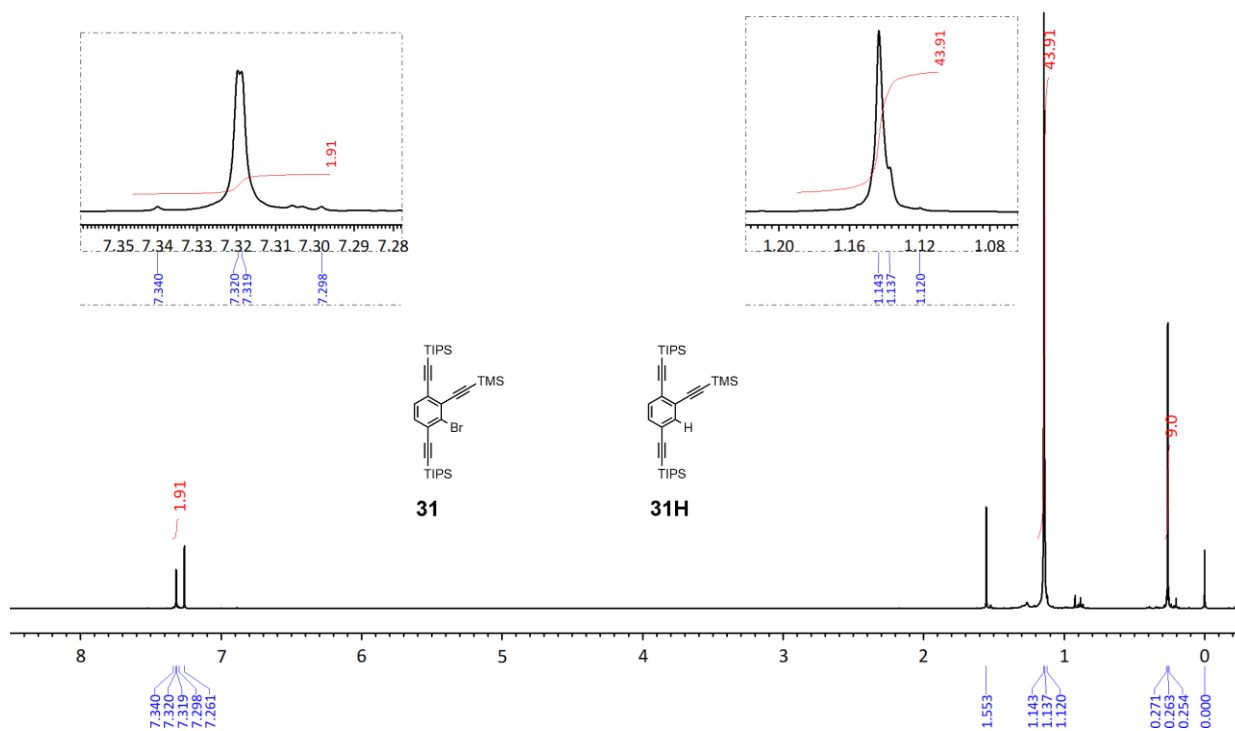

$^1\text{H}$  NMR spectrum (400 MHz) of **31/31H**, measured in  $\text{CDCl}_3$  at room temperature.

Data: common/Jul25:a00203-2  
 Sample: 3396 Sakamoto / 307  
 Experiment Date/Time: 2018/07/25 8:41:29  
 Average(MS[1] Time:0.37)

Instrument Configuration: FDフロー-FJMS-T100GCV  
 Ionization Mode: FD+  
 Acquired m/z Range: 20.00..1600.00  
 Detector Volt: 2250[V]

MS Tune Method Name: FD  
 Agilent7890A Method Name: -

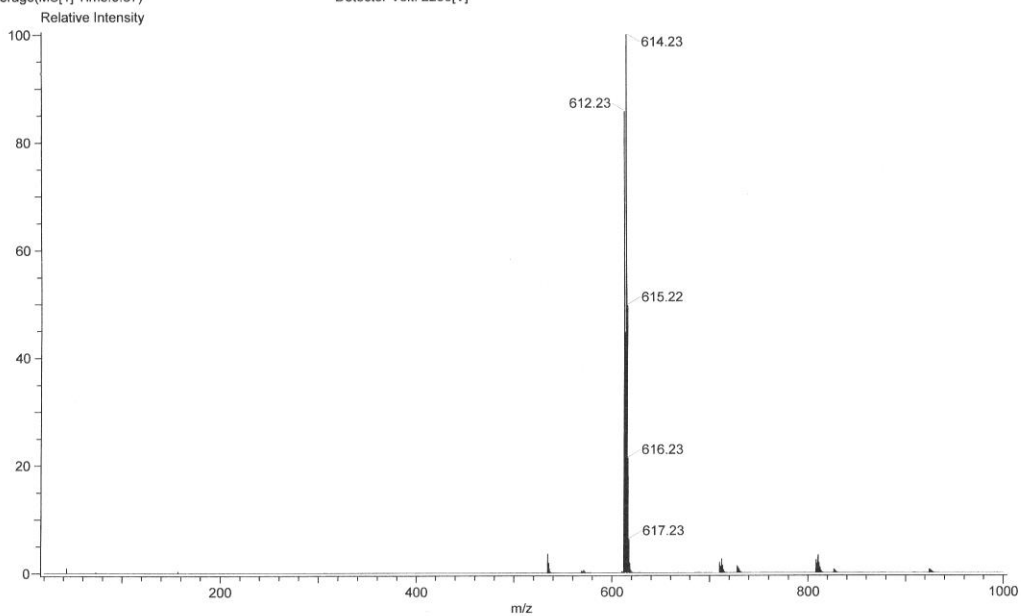

LRMS (FD) of **31/31H**.

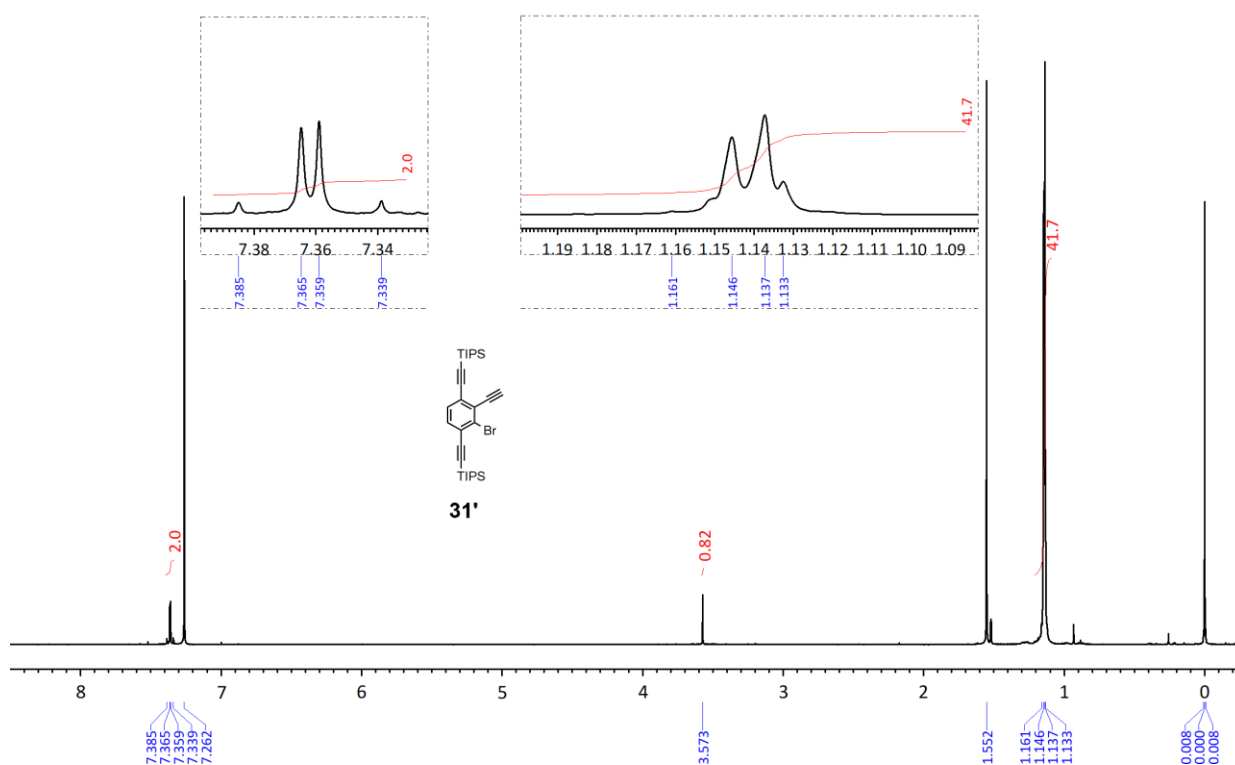

<sup>1</sup>H NMR spectrum (400 MHz) of **31'**, measured in CDCl<sub>3</sub> at room temperature.

Data: common/Jul25:a00208-  
 Sample: 3396 Sakamoto / 308  
 Experiment Date/Time: 2018/07/25 15:43:04  
 Average(MS[1] Time:0.28)

Instrument Configuration: FDフローブ,JMS-T100GCV  
 Ionization Mode: FD+  
 Acquired m/z Range: 20.00..1600.00  
 Detector Volt: 2300[V]

MS Tune Method Name: FD  
 Agilent7890A Method Name: -

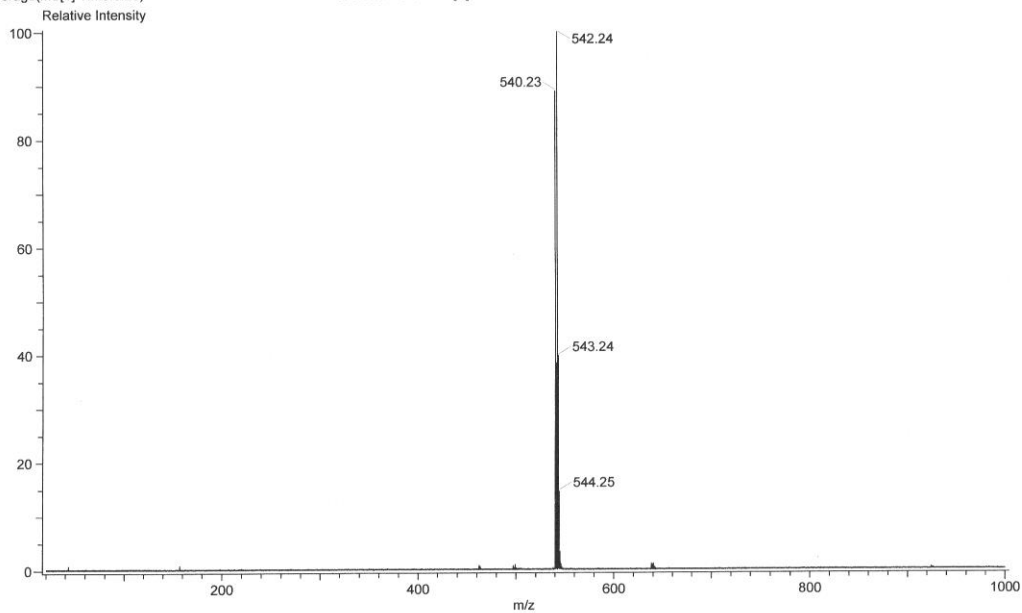

LRMS (FD) of **31'**.

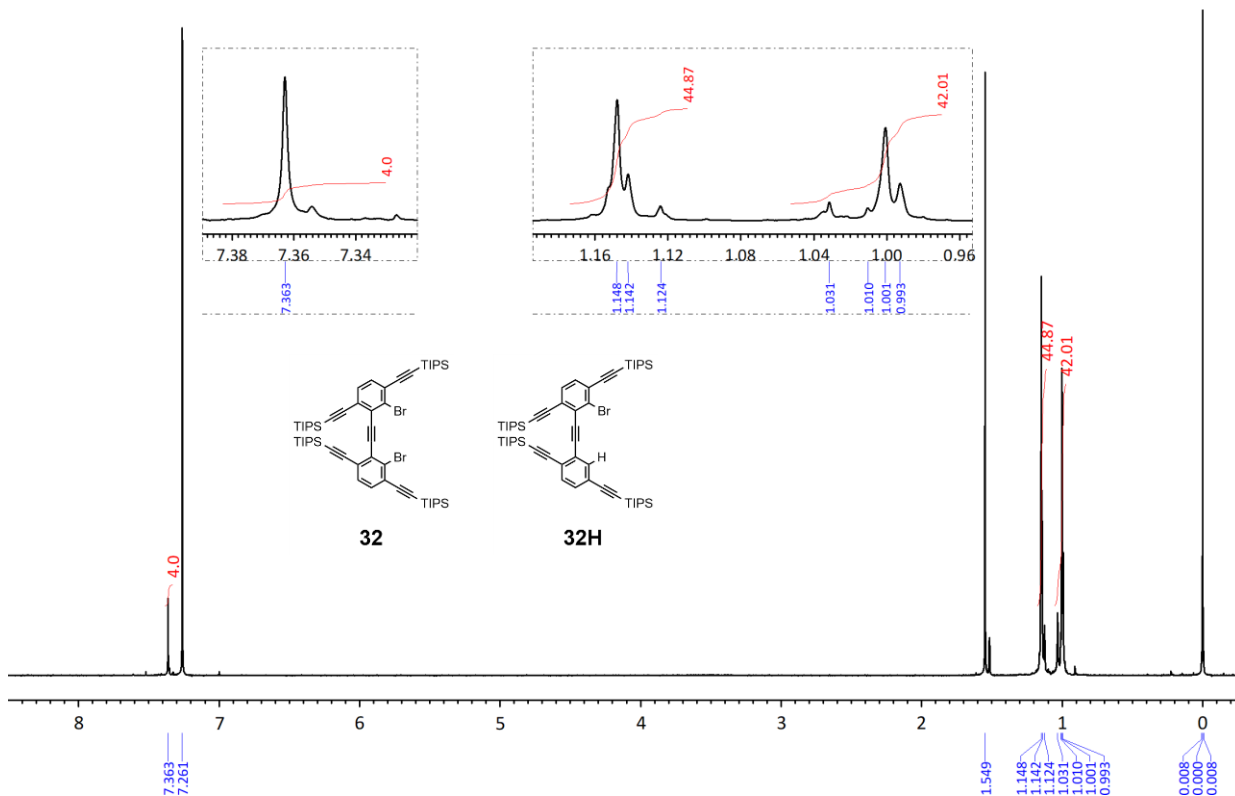

$^1\text{H}$  NMR spectrum (400 MHz) of **32/32H**, measured in  $\text{CDCl}_3$  at room temperature.

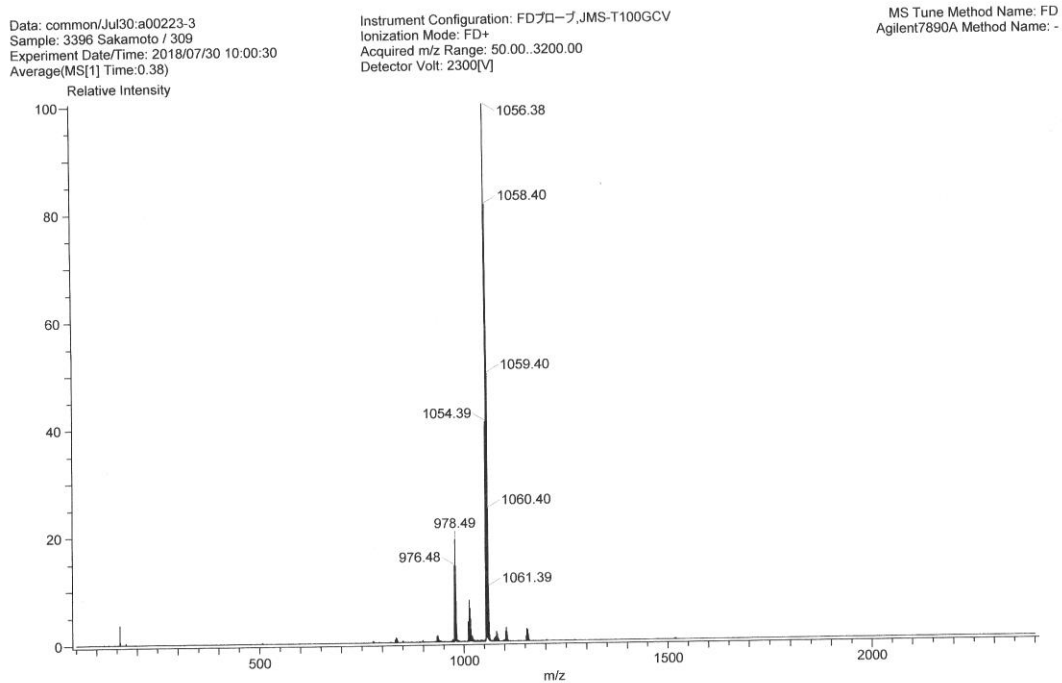

LRMS (FD) of **32/32H**.

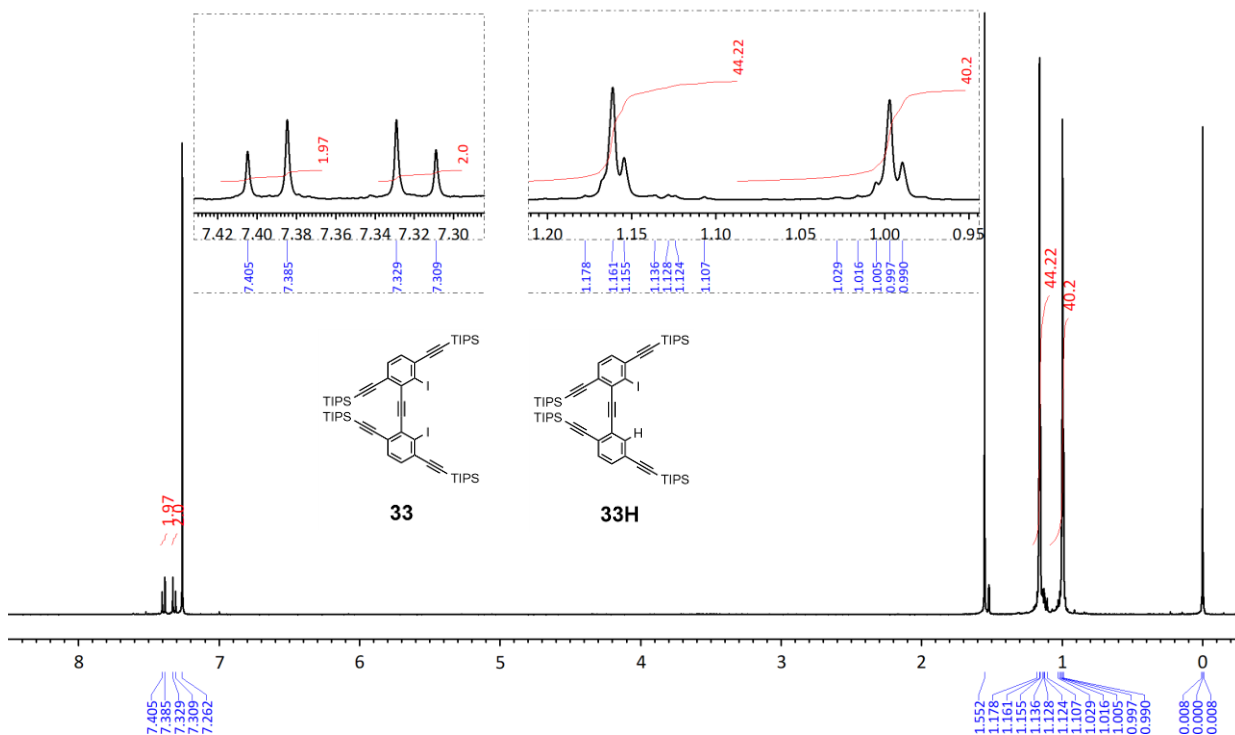

<sup>1</sup>H NMR spectrum (400 MHz) of **33/33H**, measured in CDCl<sub>3</sub> at room temperature.

Data: common/Jul30:a00224-  
 Sample: 3396 Sakamoto / 310  
 Experiment Date/Time: 2018/07/30 10:15:31  
 Average(MS[1] Time:0.33)

Instrument Configuration: FDプローブ,JMS-T100GCV  
 Ionization Mode: FD+  
 Acquired m/z Range: 50.00..3200.00  
 Detector Volt: 2300[V]

MS Tune Method Name: FD  
 Agilent7890A Method Name: -

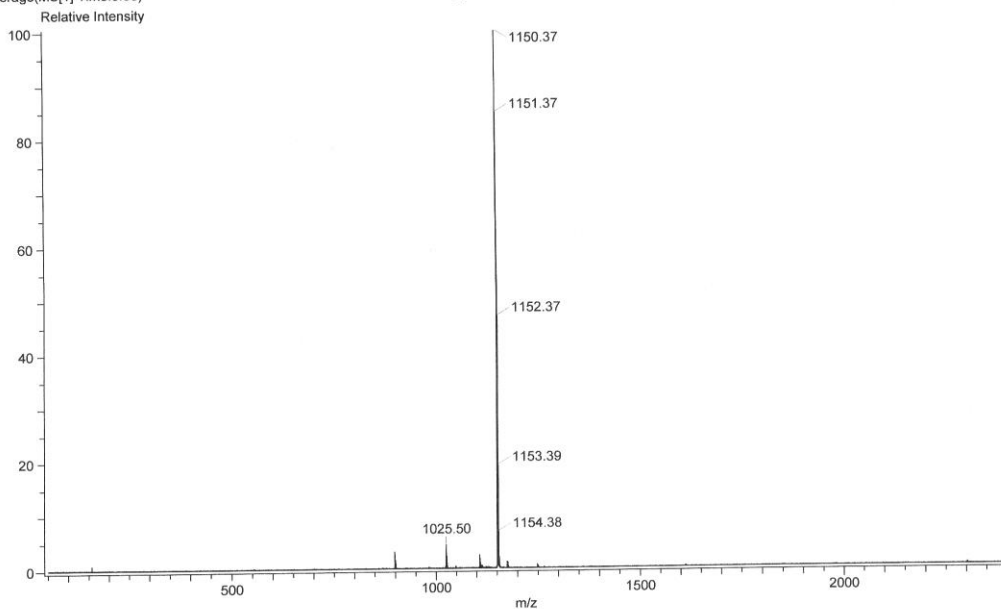

LRMS (FD) of **33/33H**.

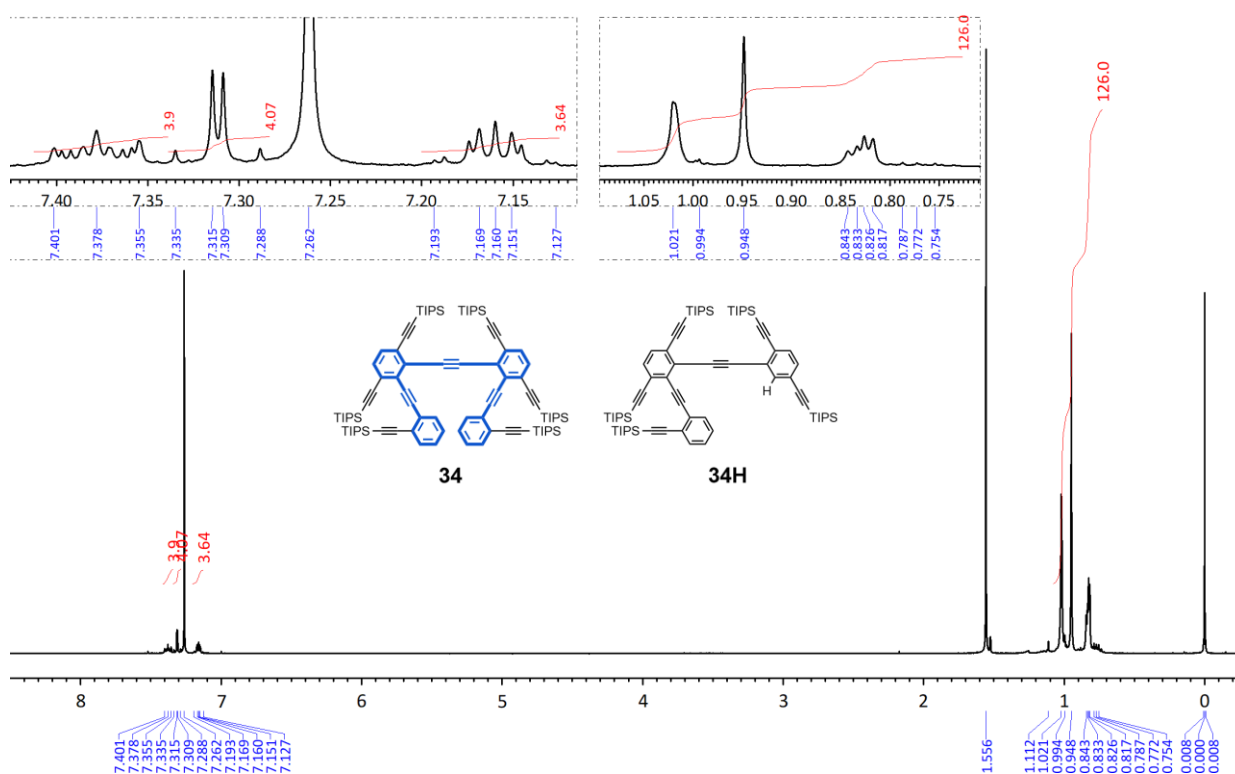

<sup>1</sup>H NMR spectrum (400 MHz) of **34/34H**, measured in CDCl<sub>3</sub> at room temperature.

Data: common/Aug07:a00240-3  
 Sample: 3396 Sakamoto / 312  
 Experiment Date/Time: 2018/08/07 11:15:50  
 Average(MS[1] Time:0.35..0.36)

Instrument Configuration: FDプローブ,JMS-T100GCV  
 Ionization Mode: FD+  
 Acquired m/z Range: 50.00..3200.00  
 Detector Volt: 2600[V]

MS Tune Method Name: FD  
 Agilent7890A Method Name: -

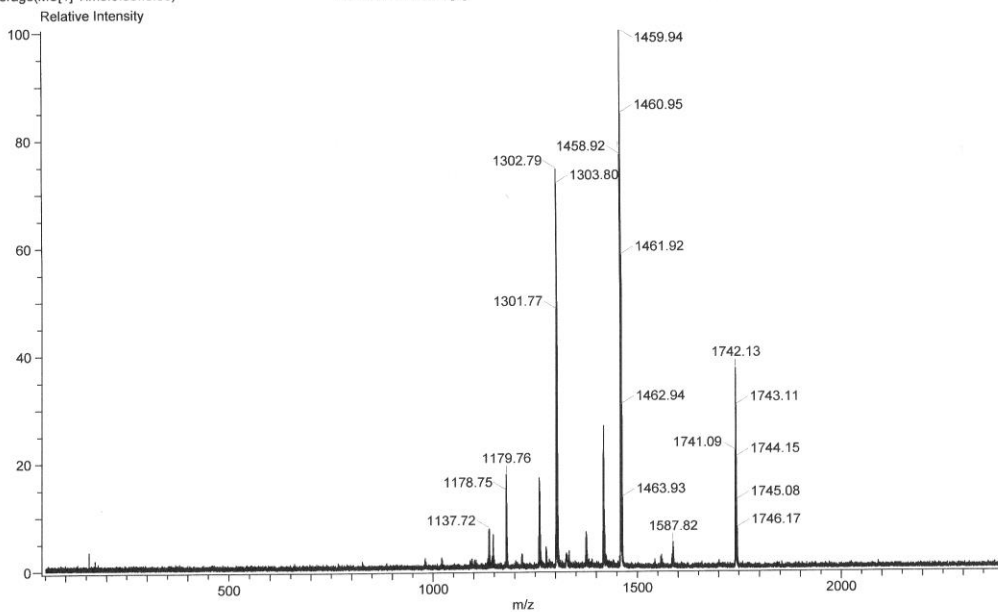

LRMS (FD) of **34/34H** (used to prepare **8**).



Data: common/Aug13:a00249-2  
Sample: 3396 Sakamoto / 319  
Experiment Date/Time: 2018/08/13 14:31:51  
Average(MS[1] Time:0.26..0.35)

Instrument Configuration: FDプローブ,JMS-T100GCV  
Ionization Mode: FD+  
Acquired m/z Range: 50.00..3200.00  
Detector Volt: 2300[V]

MS Tune Method Name: FD  
Agilent7890A Method Name: -

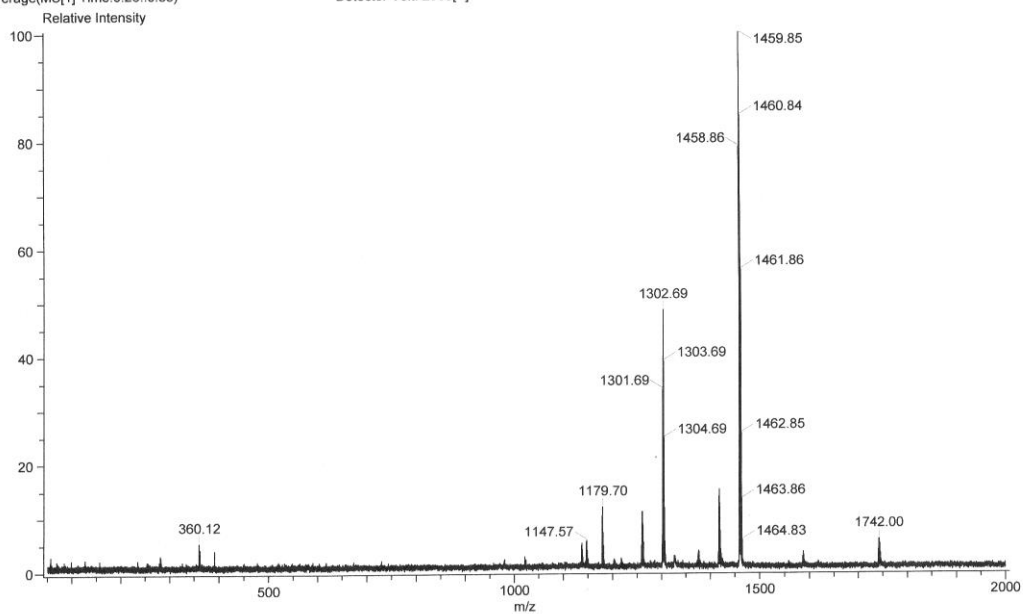

LRMS (FD) of **34/34H** (used to prepare **8B**).

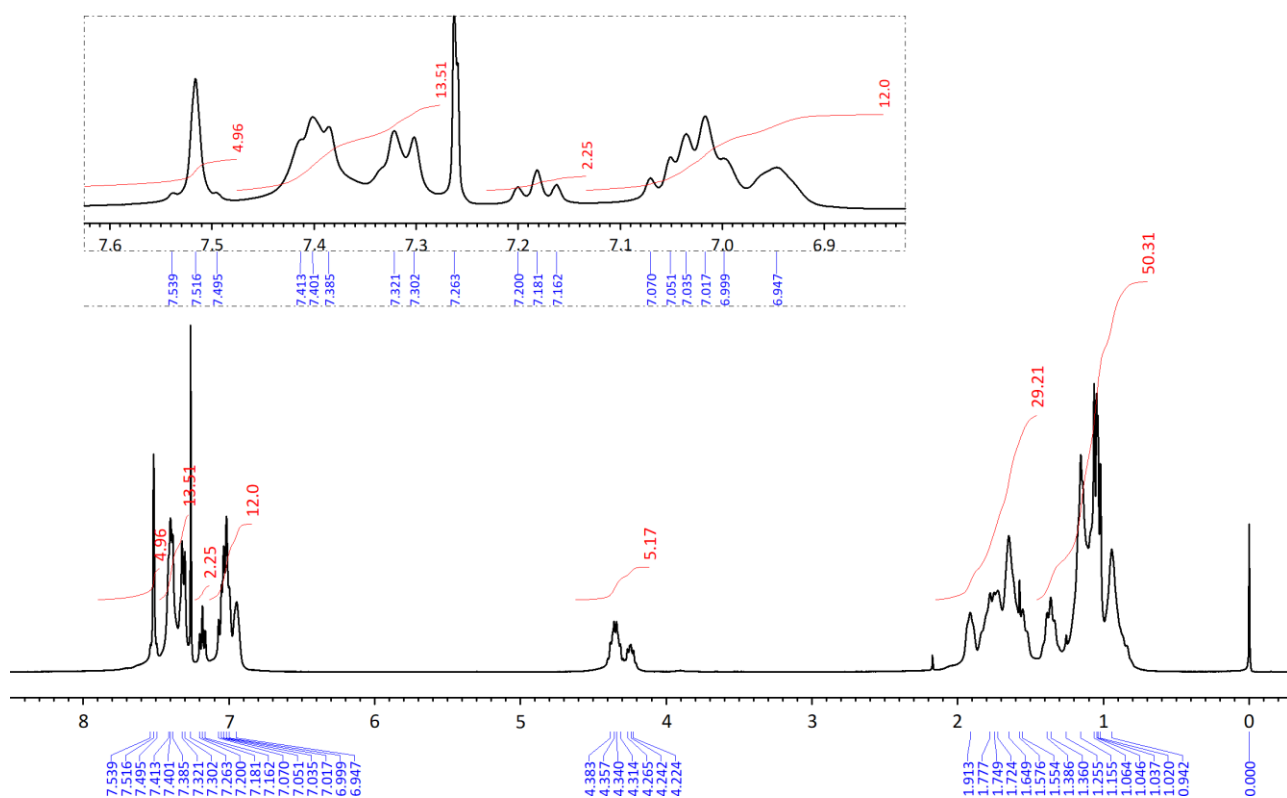

$^1\text{H}$  NMR spectrum (400 MHz) of pr-8, measured in  $\text{CDCl}_3$  at room temperature.

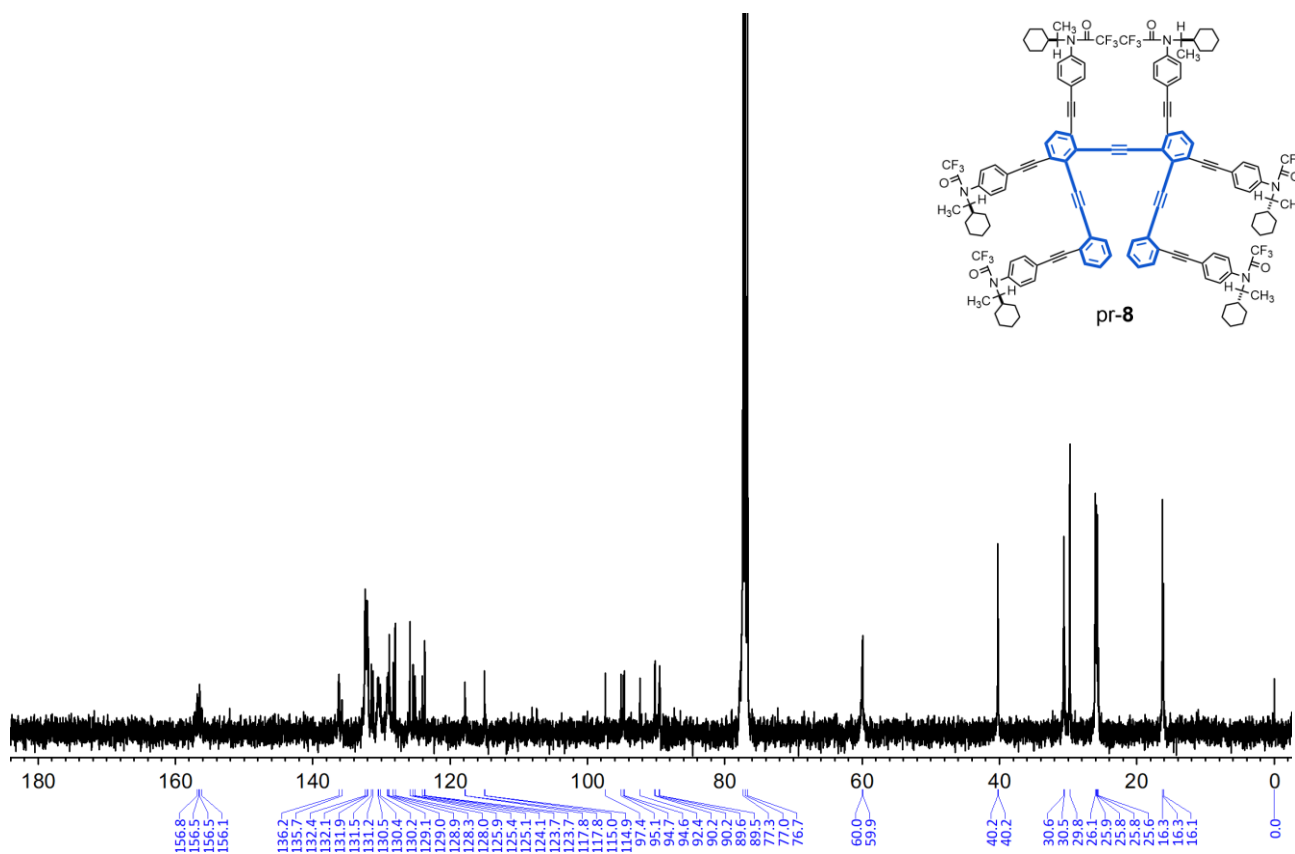

$^{13}\text{C}$  NMR spectrum (100 MHz) of pr-8, measured in  $\text{CDCl}_3$  at room temperature.

Data: common/Jan25.a00578-1  
Sample: 3396 Sakamoto / 317data  
Experiment Date/Time: 2019/01/25 11:19:17  
Average(MS[1] Time:0.36)

Instrument Configuration: FDプローブ,JMS-T100GCV  
Ionization Mode: FD+  
Acquired m/z Range: 50.00..3200.00  
Detector Volt: 2400[V]

MS Tune Method Name: FD  
Agilent7890A Method Name: -

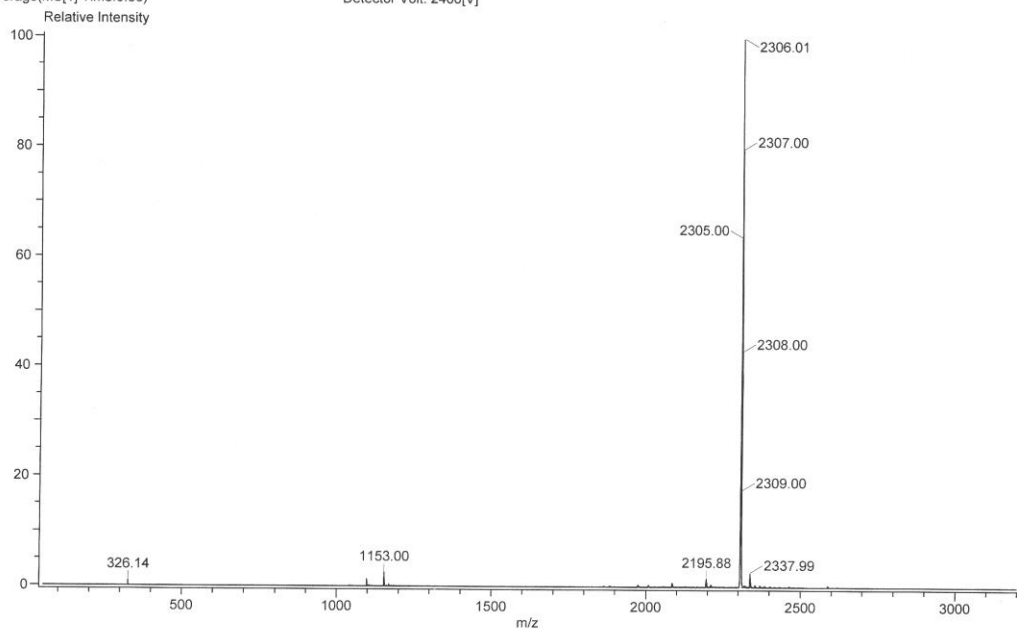

LRMS (FD) of pr-8.

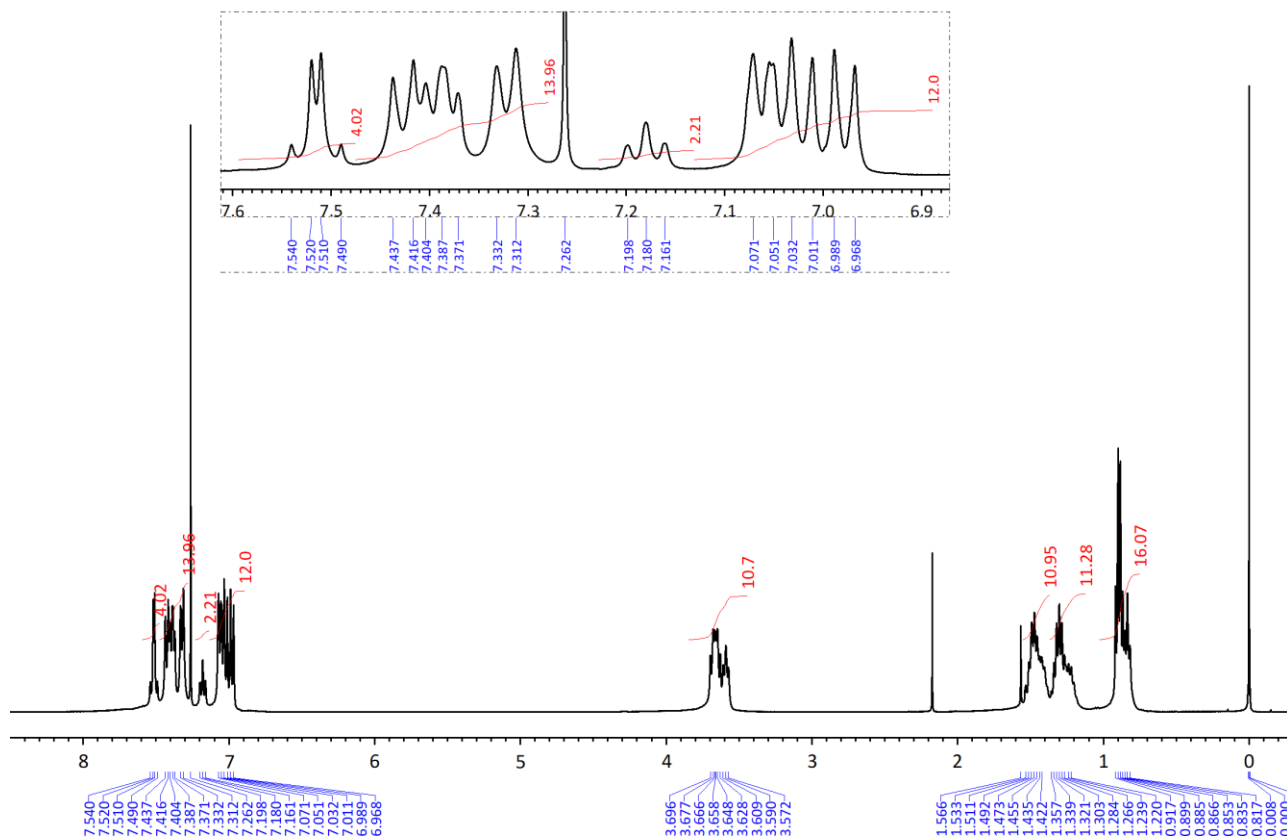

$^1\text{H}$  NMR spectrum (400 MHz) of pr-**8B**, measured in  $\text{CDCl}_3$  at room temperature.

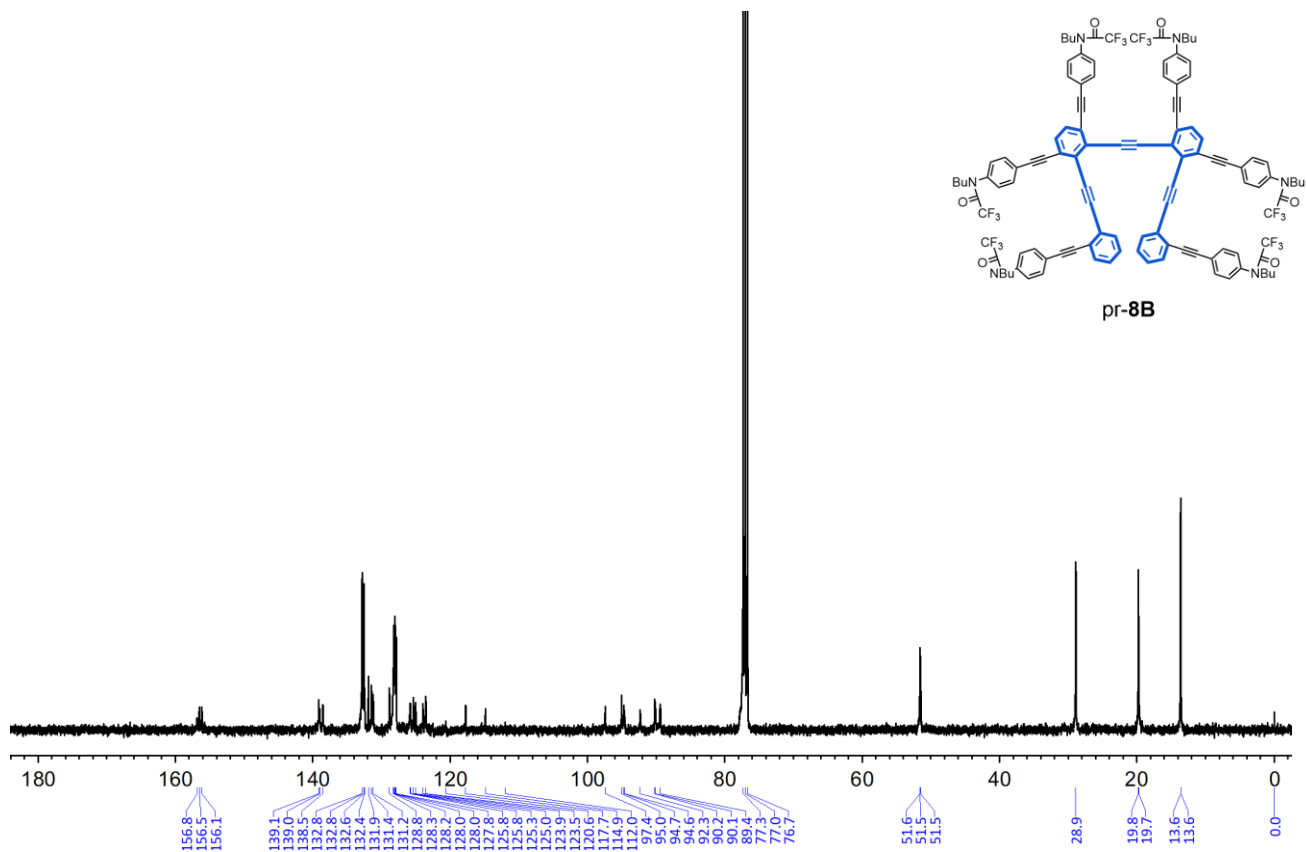

$^{13}\text{C}$  NMR spectrum (100 MHz) of pr-**8B**, measured in  $\text{CDCl}_3$  at room temperature.

Data: common/Jan25\_a00578-1  
Sample: 3396 Sakamoto / 320data  
Experiment Date/Time: 2019/01/25 10:44:51  
Average(MS[1] Time:0.31)

Instrument Configuration: FDプローブ,JMS-T100GCV  
Ionization Mode: FD+  
Acquired m/z Range: 50.00..3200.00  
Detector Volt: 2400[V]

MS Tune Method Name: FD  
Agilent7890A Method Name: -

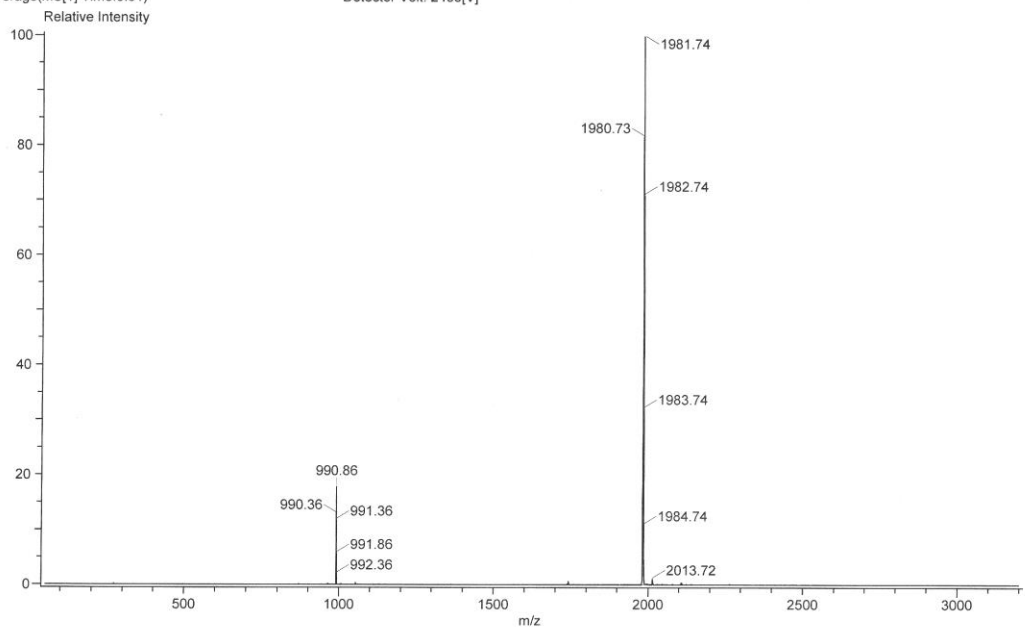

LRMS (FD) of pr-8B.

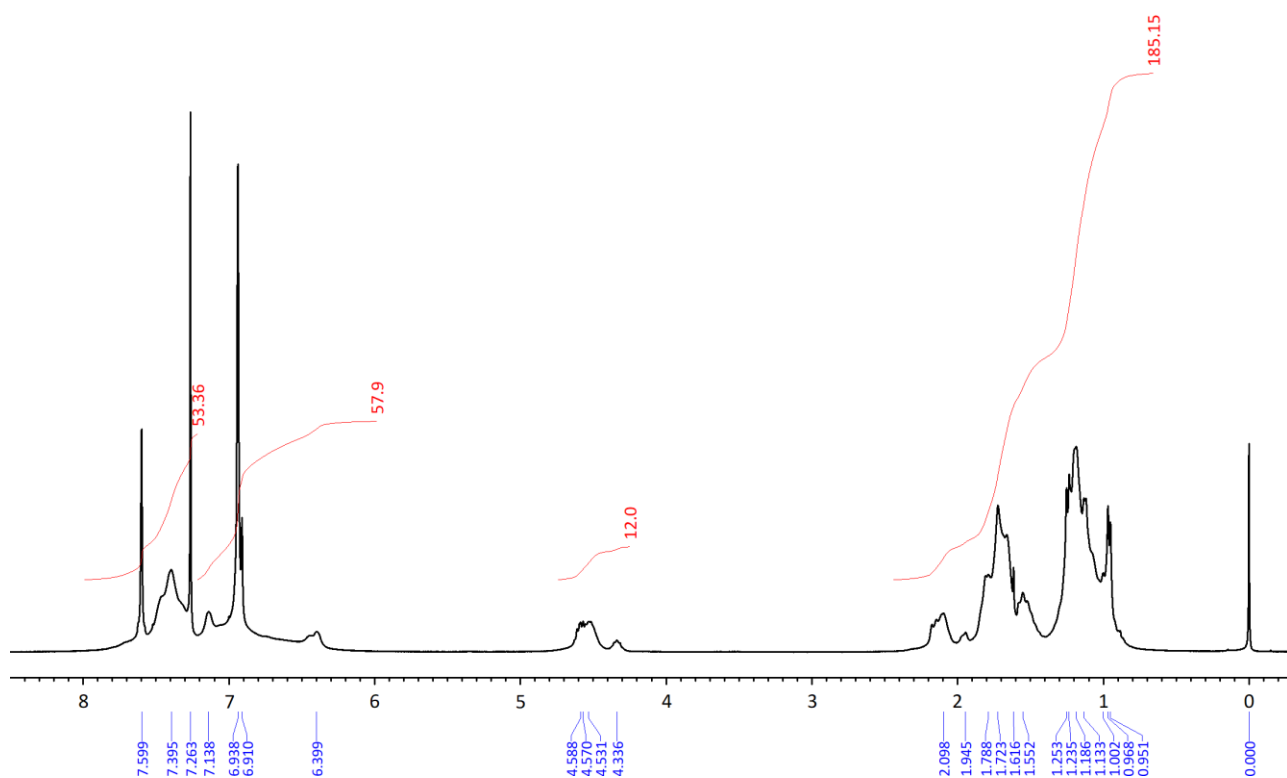

$^1\text{H}$  NMR spectrum (400 MHz) of **8**, measured in  $\text{CDCl}_3$  at room temperature.

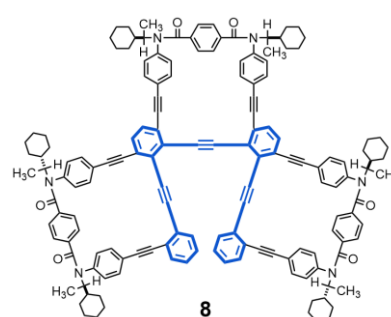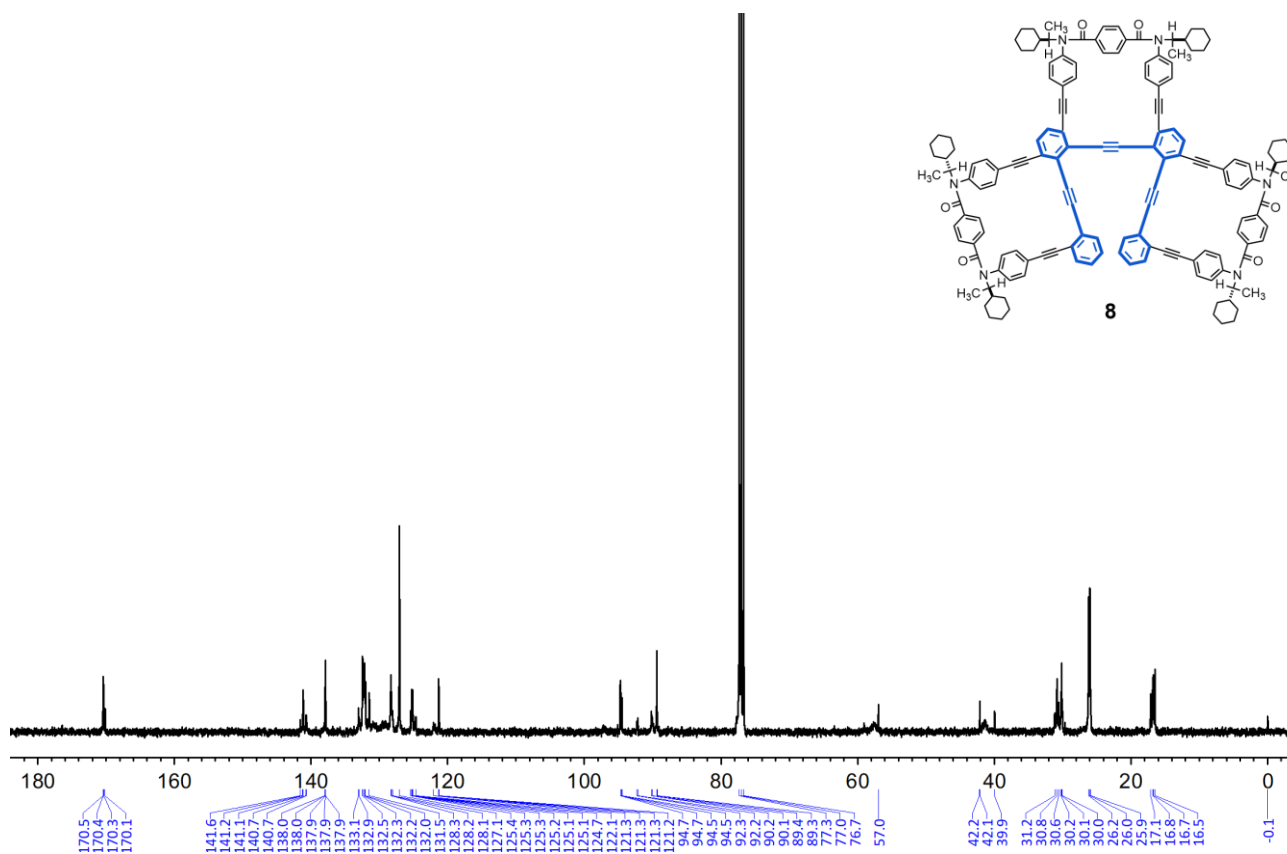

$^{13}\text{C}$  NMR spectrum (100 MHz) of **8**, measured in  $\text{CDCl}_3$  at room temperature.

Data: common/Jan25:a00577-2  
Sample: 3396 Sakamoto / 324data  
Experiment Date/Time: 2019/01/25 11:08:45  
Average(MS[1] Time:0.50)

Instrument Configuration: FDプローブ,JMS-T100GCV  
Ionization Mode: FD+  
Acquired m/z Range: 50.00..3200.00  
Detector Volt: 2400[V]

MS Tune Method Name: FD  
Agilent7890A Method Name: -

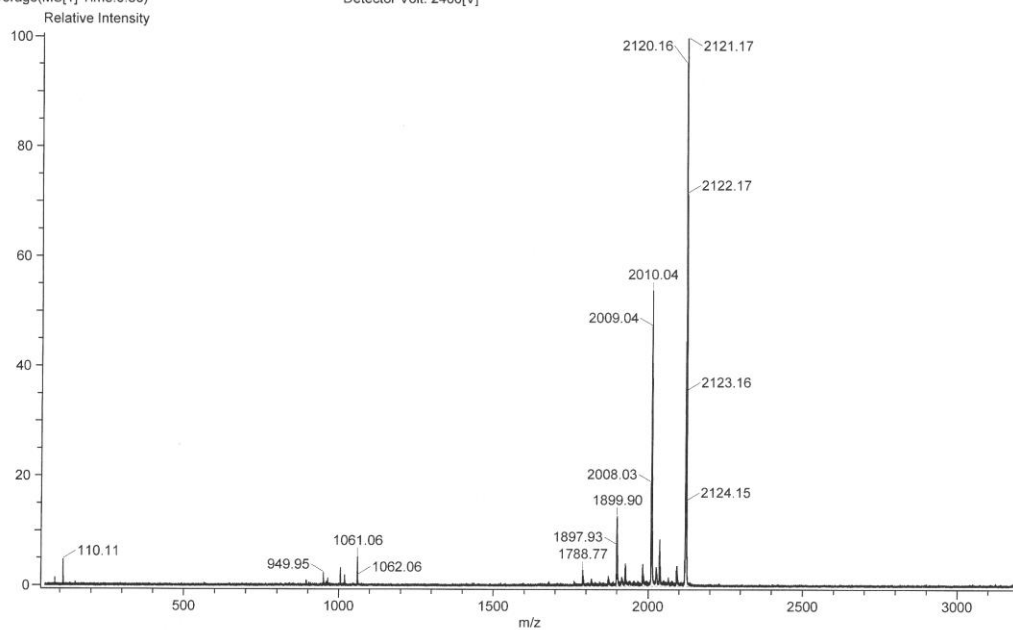

LRMS (FD) of 8.

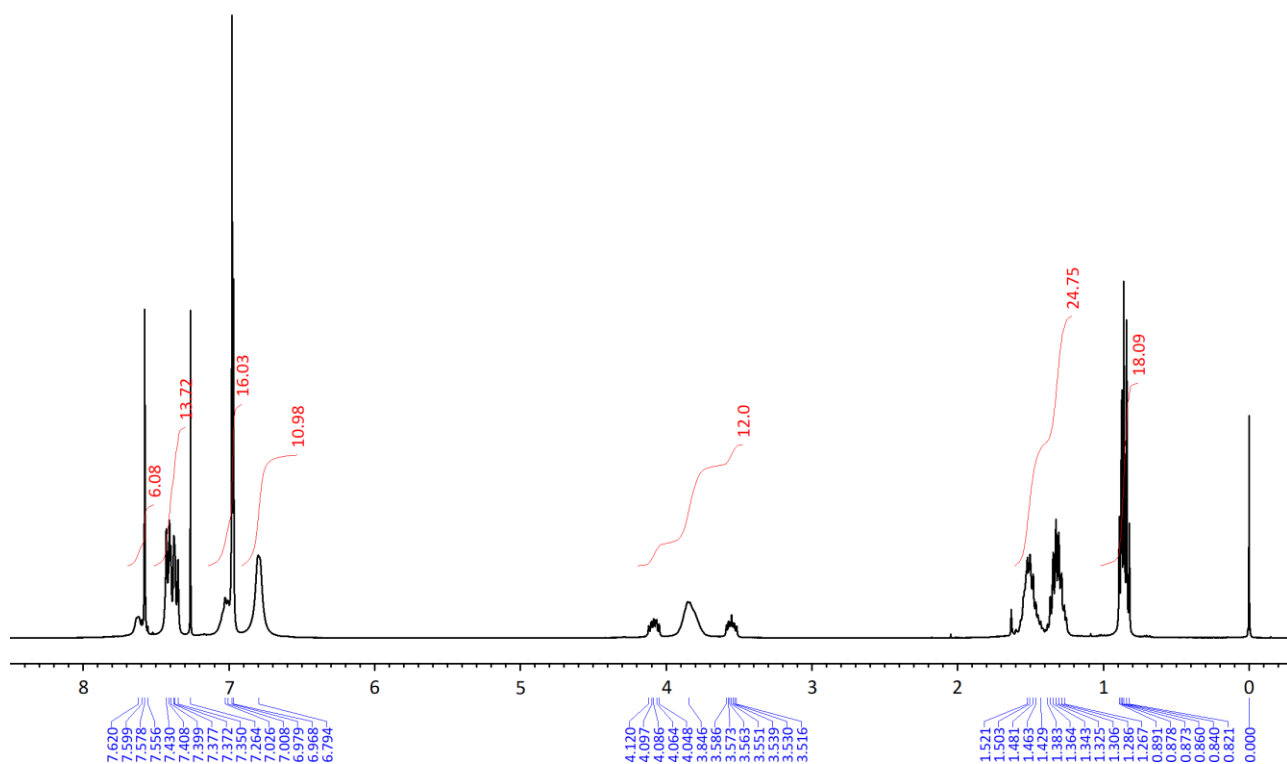

$^1\text{H}$  NMR spectrum (400 MHz) of **8B**, measured in  $\text{CDCl}_3$  at room temperature.

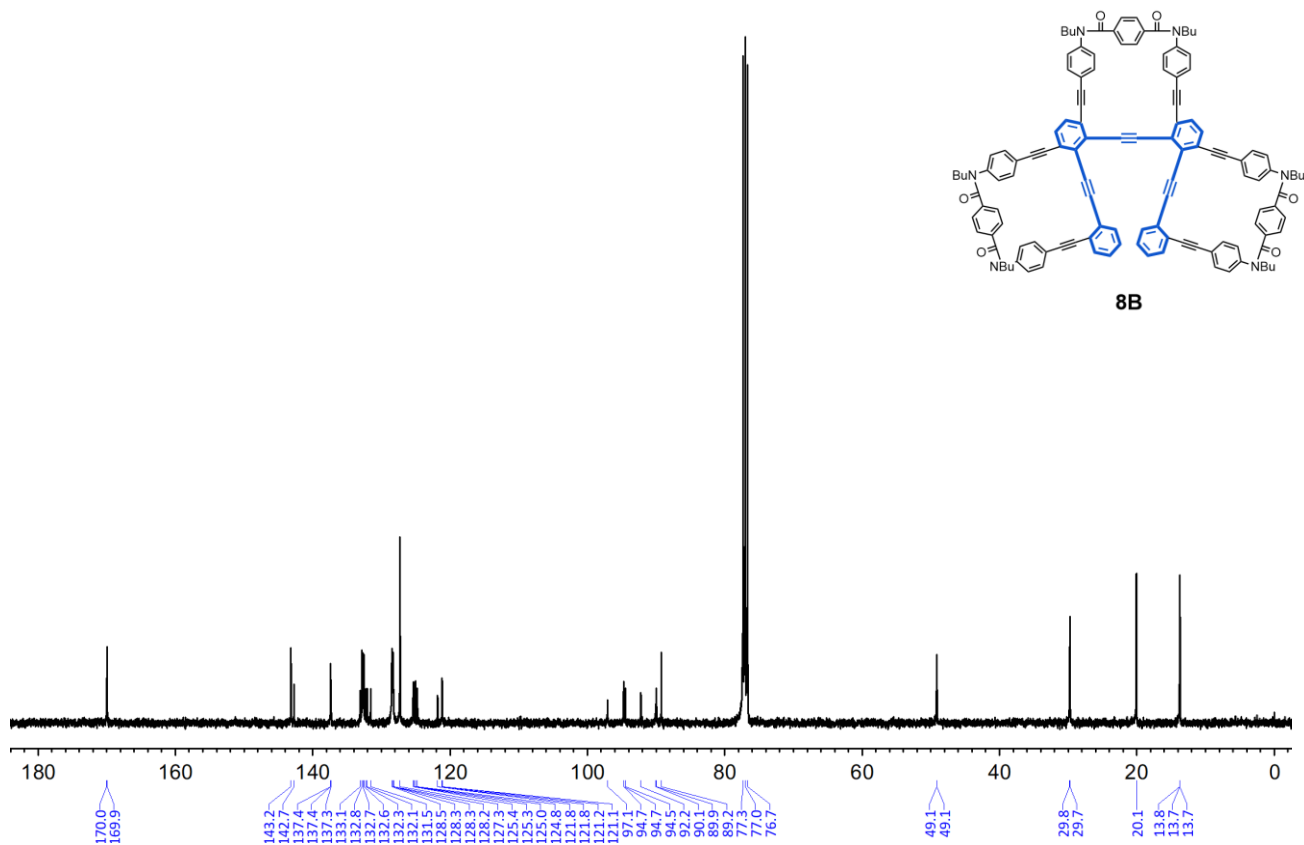

$^{13}\text{C}$  NMR spectrum (100 MHz) of **8B**, measured in  $\text{CDCl}_3$  at room temperature.

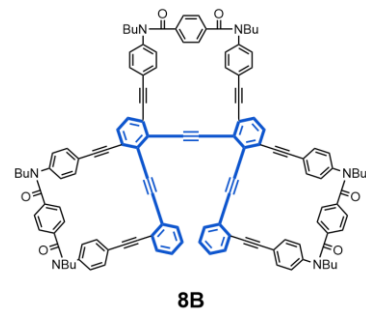



Data: common/Jan25.a00574-1  
Sample: 3396 Sakamoto / 322data  
Experiment Date/Time: 2019/01/25 10:22:02  
Average(MS[1] Time:0.47)

Instrument Configuration: FDプロ-フ,JMS-T100GCV  
Ionization Mode: FD+  
Acquired m/z Range: 50.00..3200.00  
Detector Volt: 2400[V]

MS Tune Method Name: FD  
Agilent7890A Method Name: -

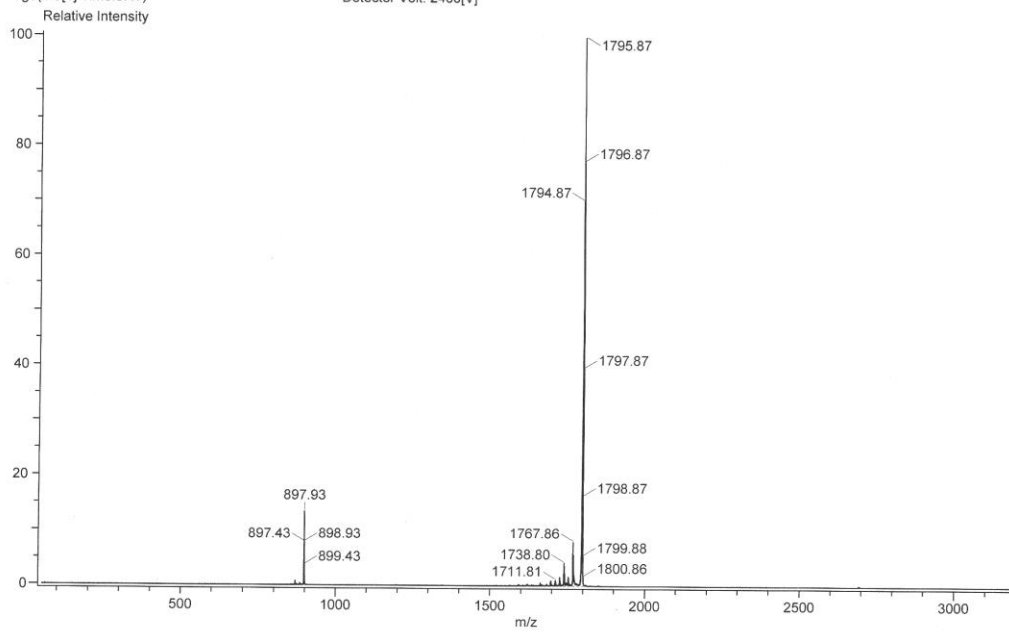

LRMS (FD) of **8B**.
